# Supplementary material for: Defective peripheral B cell tolerance leads to dysregulated B cell responses in Fibromyalgia Syndrome
Source: Research Square preprint supplement (doi:10.21203/rs.3.rs-6836742/v1), 2025-06-18
Supplement: Supplementary file 1 [file eeb1166711c5530c3d191ce5.xlsx]

## Sheet: Table S1
Table S1. Patient group characteristics
		BCR analysis				FACS analysis
		Controls (n=19)	Patients (n=15)	P		Controls (n=14)	Patients (n=14)	P
Age	Mean	41.911	51.8587	0.003		44.3592	51.4201	0.059
	Range	30.1-61.72	39-64			30.1-61.72	39-64
Sex	Male	2	2	1		2	2	1
	Female	17	13			12	12
BMI (kg/m2)	Mean	26.4	31.7	0.042		25.7668	30.1227	0.054
Race	Caucasian	19	15	1		14	14	1
Pain score	Mean	0	7.46667	<0.001		0	7.5	<0.001
Pressure pain threshold (kPa)	Mean	468.421	176.087	<0.001		488.571	180.571	<0.001
Other comorbidities	No	6	0	0.024		5	0	0.041
	Yes	13	15			9	14
Current medications	No	10	0	<0.001		7	0	0.0058
	Yes	9	15			7	14
Children birthed	Mean	1.31579	1.6	0.59		1.42857	1.57143	0.81

## Sheet: Table S2
Table S2. BCR sequence depth
Sample	Number of BCRs obtained after filtering	Number of unique BCRs obtained after filtering
FMSH13	21859	16188
FMSH14	62312	44252
FMSH15	34179	28805
FMSH16	43986	38108
FMSH17	11457	10336
FMSH18	18139	14269
FMSH19	11267	10285
FMSH20	16882	15368
FMSH21	34932	27523
FMSH22	47521	37343
FMSH23	45801	39960
FMSH24	28161	23875
FMSH25	84298	62315
FMSH26	28392	22428
FMSH27	32279	28995
FMSH28	33392	29319
FMSH29	29139	22976
FMSH30	34087	28854
FMSH31	42743	38837
FMSP054	7191	7067
FMSP055	42693	38052
FMSP056	50338	37867
FMSP057	25477	23613
FMSP058	8047	6658
FMSP059	27686	26409
FMSP060	10728	8892
FMSP061	13697	11968
FMSP062	22071	15480
FMSP063	41511	19760
FMSP064	39460	36428
FMSP065	52617	42428
FMSP066	23332	20777
FMSP067	4588	4438
FMSP068	3293	3109
FMSP069	9168	8712
FMSP070	11731	10912
FMSP071	18573	15794
FMSP072	32296	29512

## Sheet: Table S3
Table S3. Panel of antibodies used in the Flow Cytometry experiments.
Marker	Fluorophore	Clone	Company
IgM	BUV395	G20-127	BD Biosciences
Proliferation Dye	eFluor450		ThermoFisher
CD19	Super Bright 600	HIB19	Invitrogen
CD38	BV711	HIT2	BioLegend
IgD	FITC	IA6-2	Biolegend
CD3	PerCP/Cy5.5	OKT3	BioLegend
CD10	PerCP/Cy5.5	Hi10a	Biolegend
CD21	PE	B-ly4	BD Biosciences
CD14	PE-TexasRed	TuK4	Invitrogen
CD27	PE-Cy7	323	Invitrogen
CD22	APC	RFB-4	Invitrogen
CD24	AF700	eBioSN3	Biolegend
LIVE/DEAD Fixable Amine Stain	Near IR (780)		ThermoFisher

## Sheet: Table S4
Table S4. Genetic and epigenetic associations with FMS
Gene	Method of detection	Clinical relevance	Reference
SLC6A4	SNPs associated with FMS	Temporal mandibular joint disorder,Depression,Psychological disorders	https://pmc.ncbi.nlm.nih.gov/articles/PMC6322092/
COMT	SNPs associated with FMS	Depression,Anxiety,Disability	https://pmc.ncbi.nlm.nih.gov/articles/PMC6322092/
HTR2A	SNPs associated with FMS	FIQ disability, Fibromyalgia onset	https://pmc.ncbi.nlm.nih.gov/articles/PMC6322092/
MYT1L	SNPs associated with FMS	Cognitive disability	https://pmc.ncbi.nlm.nih.gov/articles/PMC6322092/
NRXN3	SNPs associated with FMS	Autism	https://pmc.ncbi.nlm.nih.gov/articles/PMC6322092/
TAAR1	SNPs associated with FMS	Impaired dopamine availability,Enhanced pain sensitivity	https://pmc.ncbi.nlm.nih.gov/articles/PMC6322092/
RGS4	SNPs associated with FMS	Alteration in the descending inhibition of pain perception	https://pmc.ncbi.nlm.nih.gov/articles/PMC6322092/
CNR1	SNPs associated with FMS	MigraineIrritable bowel syndrome,Post-traumatic stress disorder	https://pmc.ncbi.nlm.nih.gov/articles/PMC6322092/
GRIA4	SNPs associated with FMS	Central sensitization	https://pmc.ncbi.nlm.nih.gov/articles/PMC6322092/
BDNF	Genes differentially methylated in FM women	Mood disordersAlzheimerParkinson Huntington’s disease	https://pmc.ncbi.nlm.nih.gov/articles/PMC6322092/
NAT15	Genes differentially methylated in FM women	Acetylation processFacilitation of transcription process	https://pmc.ncbi.nlm.nih.gov/articles/PMC6322092/
HDAC4	Genes differentially methylated in FM women	Deacetylation’s process, Gene silencing	https://pmc.ncbi.nlm.nih.gov/articles/PMC6322092/
PRKCA	Genes differentially methylated in FM women	Post-traumatic stress syndromeEmotional memory formationCancer	https://pmc.ncbi.nlm.nih.gov/articles/PMC6322092/
RTN1	Genes differentially methylated in FM women	Neurological diseases Cancer	https://pmc.ncbi.nlm.nih.gov/articles/PMC6322092/
PRKG1	Genes differentially methylated in FM women	Aortic aneurysm, Phosphoglycerate kinase deficiency	https://pmc.ncbi.nlm.nih.gov/articles/PMC6322092/
SLC17A9	Genes differentially methylated in FM women	Neuronal plasticity	https://pmc.ncbi.nlm.nih.gov/articles/PMC6322092/
TFAP2A	Genes differentially methylated in FM women	Neuronal circuits	https://pmc.ncbi.nlm.nih.gov/articles/PMC6322092/

## Sheet: Table S5
Relevent	DATE ADDED TO CATALOG	PUBMEDID	FIRST AUTHOR	DATE	JOURNAL	LINK	STUDY	DISEASE/TRAIT	INITIAL SAMPLE SIZE	REPLICATION SAMPLE SIZE	REGION	CHR_ID	CHR_POS	REPORTED GENE(S)	MAPPED_GENE	UPSTREAM_GENE_ID	DOWNSTREAM_GENE_ID	SNP_GENE_IDS	UPSTREAM_GENE_DISTANCE	DOWNSTREAM_GENE_DISTANCE	STRONGEST SNP-RISK ALLELE	SNPS	MERGED	SNP_ID_CURRENT	CONTEXT	INTERGENIC	RISK ALLELE FREQUENCY	P-VALUE	PVALUE_MLOG	P-VALUE (TEXT)	OR or BETA	95% CI (TEXT)	PLATFORM [SNPS PASSING QC]	CNV	MAPPED_TRAIT	MAPPED_TRAIT_URI	STUDY ACCESSION	GENOTYPING TECHNOLOGY
	2017-11-30	29059683	Michailidou K	2017-10-23	Nature	www.ncbi.nlm.nih.gov/pubmed/29059683	Association analysis identifies 65 new breast cancer risk loci.	Breast cancer	76,192 European ancestry cases, 63,082 European ancestry controls	46,785 European ancestry cases, 42,892 European ancestry controls, 14,068 East Asian ancestry cases, 13,104 East Asian ancestry controls	10q21.1	10	51918266	NR	PRKG1			ENSG00000185532			rs1937680-A	rs1937680	0	1937680	intron_variant	0	0.6658	3e-07	6.52288	(EA)	0.0341	[0.021-0.047] unit decrease	Illumina [~ 11800000] (imputed)	N	breast carcinoma	http://www.ebi.ac.uk/efo/EFO_0000305	GCST004988	Genome-wide genotyping array
	2017-12-01	28928442	Tian C	2017-09-19	Nat Commun	www.ncbi.nlm.nih.gov/pubmed/28928442	Genome-wide association and HLA region fine-mapping studies identify susceptibility loci for multiple common infections.	Shingles	16,711 European ancestry cases, 118,152 European ancestry controls	NA	10q21.1	10	52088917	NR	PRKG1			ENSG00000185532			rs186074538-?	rs186074538	0	186074538	intron_variant	0	NR	2e-06	5.69897		0.6424	[0.36-0.93] unit decrease	Illumina [at least 560000] (imputed)	N	susceptibility to shingles measurement	http://www.ebi.ac.uk/efo/EFO_0008401	GCST005001	Genome-wide genotyping array
	2019-11-05	30239722	Pulit SL	2018-09-14	Hum Mol Genet	www.ncbi.nlm.nih.gov/pubmed/30239722	Meta-analysis of genome-wide association studies for body fat distribution in 694,649 individuals of European ancestry.	Body mass index	434,794 European ancestry female individuals	NA	10q21.1	10	51917553	NA	PRKG1			ENSG00000185532			rs10823893-A	rs10823893	0	10823893	intron_variant	0	0.407	2e-10	9.69897		0.0124	[0.0087-0.0161] unit increase	NR [~ 27400000] (imputed)	N	body mass index	http://www.ebi.ac.uk/efo/EFO_0004340	GCST009003	Genome-wide genotyping array
	2019-11-05	30239722	Pulit SL	2018-09-14	Hum Mol Genet	www.ncbi.nlm.nih.gov/pubmed/30239722	Meta-analysis of genome-wide association studies for body fat distribution in 694,649 individuals of European ancestry.	Body mass index	806,834 European ancestry individuals	NA	10q21.1	10	51917553	NA	PRKG1			ENSG00000185532			rs10823893-A	rs10823893	0	10823893	intron_variant	0	0.407	2e-10	9.69897		0.0124	[0.0087-0.0161] unit increase	NR [~ 27400000] (imputed)	N	body mass index	http://www.ebi.ac.uk/efo/EFO_0004340	GCST009004	Genome-wide genotyping array
	2019-02-06	30595370	Kichaev G	2018-12-27	Am J Hum Genet	www.ncbi.nlm.nih.gov/pubmed/30595370	Leveraging Polygenic Functional Enrichment to Improve GWAS Power.	Body mass index	approximately 458,000 European ancestry individuals	NA	10q21.1	10	51913526		PRKG1			ENSG00000185532			rs4595495-?	rs4595495	0	4595495	intron_variant	0	NR	2e-10	9.69897				NR [~ 8900000] (imputed)	N	body mass index	http://www.ebi.ac.uk/efo/EFO_0004340	GCST007039	Genome-wide genotyping array
	2019-01-31	29274321	Chung J	2017-12-20	Alzheimers Dement	www.ncbi.nlm.nih.gov/pubmed/29274321	Genome-wide association study of Alzheimer's disease endophenotypes at prediagnosis stages.	Logical memory (delayed recall) in normal cognition	305 European ancestry cognitively normal individuals	NA	10q21.1	10	52058389	CSTF2T, DKK1, PRKG1	PRKG1			ENSG00000185532			rs12268753-C	rs12268753	0	12268753	intron_variant	0	0.21	2e-08	7.69897		0.3	[0.2-0.4] unit increase	Illumina [7797256] (imputed)	N	memory performance	http://www.ebi.ac.uk/efo/EFO_0004874	GCST007006	Genome-wide genotyping array
	2019-05-21	30595370	Kichaev G	2018-12-27	Am J Hum Genet	www.ncbi.nlm.nih.gov/pubmed/30595370	Leveraging Polygenic Functional Enrichment to Improve GWAS Power.	Height	approximately 458,000 European ancestry individuals	NA	10q21.1	10	51531231		PRKG1			ENSG00000185532			rs61849823-?	rs61849823	0	61849823	intron_variant	0	NR	4e-27	26.3979				NR [~ 8900000] (imputed)	N	body height	http://purl.obolibrary.org/obo/OBA_VT0001253	GCST007841	Genome-wide genotyping array
	2019-02-08	30595370	Kichaev G	2018-12-27	Am J Hum Genet	www.ncbi.nlm.nih.gov/pubmed/30595370	Leveraging Polygenic Functional Enrichment to Improve GWAS Power.	Lung function (FVC)	approximately 372,000 European ancestry individuals	NA	10q11.23	10	51002206		PRKG1			ENSG00000185532			rs6479841-?	rs6479841	0	6479841	intron_variant	0	NR	3e-14	13.5229				NR [~ 8900000] (imputed)	N	vital capacity	http://www.ebi.ac.uk/efo/EFO_0004312	GCST007081	Genome-wide genotyping array
	2020-12-24	28322283	Chibnik LB	2017-03-21	Mol Psychiatry	www.ncbi.nlm.nih.gov/pubmed/28322283	Susceptibility to neurofibrillary tangles: role of the PTPRD locus and limited pleiotropy with other neuropathologies.	Neuritic plaque	909 European ancestry individuals	369 individuals	10q21.1	10	52029907		PRKG1			ENSG00000185532			rs10762540-C	rs10762540	0	10762540	intron_variant	0	0.45	2e-06	5.69897	(EA)			Affymetrix, Illumina [NR] (imputed)	N	neuritic plaque measurement	http://www.ebi.ac.uk/efo/EFO_0006798	GCST90012825	Genome-wide genotyping array
	2019-02-08	30595370	Kichaev G	2018-12-27	Am J Hum Genet	www.ncbi.nlm.nih.gov/pubmed/30595370	Leveraging Polygenic Functional Enrichment to Improve GWAS Power.	Systolic blood pressure	approximately 422,000 European ancestry individuals	NA	10q21.1	10	51909130		PRKG1			ENSG00000185532			rs11000060-?	rs11000060	0	11000060	intron_variant	0	NR	4e-09	8.39794				NR [~ 8900000] (imputed)	N	systolic blood pressure	http://www.ebi.ac.uk/efo/EFO_0006335	GCST007087	Genome-wide genotyping array
Yes	2013-06-14	23382691	Lauc G	2013-01-31	PLoS Genet	www.ncbi.nlm.nih.gov/pubmed/23382691	Loci associated with N-glycosylation of human immunoglobulin G show pleiotropy with autoimmune diseases and haematological cancers.	IgG glycosylation	2,247 European ancestry individuals	NA	10q21.1	10	51502873	NR	PRKG1			ENSG00000185532			rs1952138-C	rs1952138	0	1952138	intron_variant	0	0.766987	3e-06	5.52288	(IGP47)	0.1724	[0.1-0.24] unit decrease	Illumina [~ 2500000] (imputed)	N	serum IgG glycosylation measurement	http://www.ebi.ac.uk/efo/EFO_0005193	GCST001848	Genome-wide genotyping array
	2013-04-09	23251661	Comuzzie AG	2012-12-04	PLoS One	www.ncbi.nlm.nih.gov/pubmed/23251661	Novel genetic loci identified for the pathophysiology of childhood obesity in the Hispanic population.	Obesity-related traits	815 Hispanic children from 263 families	NA	10q21.1	10	51482943	PRKG1	PRKG1			ENSG00000185532			rs293314-G	rs293314	0	293314	intron_variant	0	0.056	7e-06	5.1549	(Sitting height )	0.03	[NR] cm increase	Illumina [899892]	N	body height	http://purl.obolibrary.org/obo/OBA_VT0001253	GCST001762	Genome-wide genotyping array
	2011-09-30	21907864	Ferreira MA	2011-09-10	Lancet	www.ncbi.nlm.nih.gov/pubmed/21907864	Identification of IL6R and chromosome 11q13.5 as risk loci for asthma.	Asthma	12,475 European ancestry cases, 19,967 European ancestry controls	3,322 European ancestry cases, 22,036 European ancestry controls	10q21.1	10	51733713	PRKG1	PRKG1			ENSG00000185532			rs7922491-A	rs7922491	0	7922491	intron_variant	0	0.11	5e-07	6.30103		1.13	[1.08-1.19]	Illumina [NR] (imputed)	N	asthma	http://purl.obolibrary.org/obo/MONDO_0004979	GCST001226	Genome-wide genotyping array
	2016-07-20	26219847	Adams HH	2015-07-28	J Gerontol A Biol Sci Med Sci	www.ncbi.nlm.nih.gov/pubmed/26219847	Heritability and Genome-Wide Association Analyses of Human Gait Suggest Contribution of Common Variants.	Gait rhythm	2,946 individuals	NA	10q21.1	10	52034772	PRKG1	PRKG1			ENSG00000185532			rs10823991-A	rs10823991	0	10823991	intron_variant	0	0.27	1e-06	6		0.138	[0.083-0.193] unit increase	Illumina [6200000] (imputed)	N	gait quality	http://purl.obolibrary.org/obo/OBA_1000869	GCST003054	Genome-wide genotyping array
	2017-03-20	27629369	Gao J	2016-09-15	Neuropsychopharmacology	www.ncbi.nlm.nih.gov/pubmed/27629369	Genome-Wide Association Study of Loneliness Demonstrates a Role for Common Variation.	Loneliness (multivariate analysis)	8,490 European ancestry individuals, 1,228 African American individuals, 867 Hispanic American individuals, 175 individuals	NA	10q21.1	10	51495239	PRKG1	PRKG1			ENSG00000185532			rs147455943-?	rs147455943	0	147455943	intron_variant	0	NR	5e-06	5.30103	(EA)			Illumina [7205781] (imputed)	N	loneliness measurement	http://www.ebi.ac.uk/efo/EFO_0007865	GCST003773	Genome-wide genotyping array
Yes	2015-06-22	25338677	Kariuki SN	2014-10-23	Genes Immun	www.ncbi.nlm.nih.gov/pubmed/25338677	Genetic analysis of the pathogenic molecular sub-phenotype interferon-alpha identifies multiple novel loci involved in systemic lupus erythematosus.	Interferon alpha levels in systemic lupus erythematosus	88 European ancestry high interferon alpha cases, 322 European ancestry low interferon alpha cases	715 European ancestry cases, 450 African American cases	10q21.1	10	51197961	PRKG1, A1CF, CSTF2T	PRKG1			ENSG00000185532			rs7897633-?	rs7897633	0	7897633	intron_variant	0	NR	3e-08	7.52288	(EA)	1.69492	[1.28-2.27]	Illumina [291943]	N	interferon alpha measurement	http://www.ebi.ac.uk/efo/EFO_0006517	GCST002666	Genome-wide genotyping array
	2014-01-08	23793025	Anttila V	2013-06-23	Nat Genet	www.ncbi.nlm.nih.gov/pubmed/23793025	Genome-wide meta-analysis identifies new susceptibility loci for migraine.	Migraine	23,285 European ancestry cases, 95,425 European ancestry controls	NA	10q11.23	10	51029595	intergenic	PRKG1			ENSG00000185532			rs6479874-T	rs6479874	0	6479874	intron_variant	0	0.14	3e-07	6.52288		1.09	[1.05-1.12]	Affymetrix, Illumina [~ 2300000] (imputed)	N	migraine disorder	http://purl.obolibrary.org/obo/MONDO_0005277	GCST002081	Genome-wide genotyping array
	2014-01-08	23793025	Anttila V	2013-06-23	Nat Genet	www.ncbi.nlm.nih.gov/pubmed/23793025	Genome-wide meta-analysis identifies new susceptibility loci for migraine.	Migraine	23,285 European ancestry cases, 95,425 European ancestry controls	NA	10q21.1	10	51922034	intergenic	PRKG1			ENSG00000185532			rs11000137-T	rs11000137	0	11000137	intron_variant	0	0.17	3e-06	5.52288		1.07	[1.04-1.10]	Affymetrix, Illumina [~ 2300000] (imputed)	N	migraine disorder	http://purl.obolibrary.org/obo/MONDO_0005277	GCST002081	Genome-wide genotyping array
	2024-10-18	39349817	Park S	2024-09-30	Nat Genet	www.ncbi.nlm.nih.gov/pubmed/39349817	Multivariate genomic analysis of 5‚Äâmillion people elucidates the genetic architecture of shared components of the metabolic syndrome.	Metabolic syndrome	1,384,348 European ancestry individuals	NA	10q21.1	10	51884764		PRKG1			ENSG00000185532			rs10999927-?	rs10999927	0	10999927	intron_variant	0	NR	3e-08	7.52288		0.00748284	[0.0049-0.01] unit decrease	NR [2265555] (imputed)	N	metabolic syndrome	http://www.ebi.ac.uk/efo/EFO_0000195	GCST90444487	Genome-wide genotyping array
	2018-07-04	29771307	Aponte JL	2018-05-16	Hum Mol Genet	www.ncbi.nlm.nih.gov/pubmed/29771307	Assessment of rosacea symptom severity by genome-wide association study and expression analysis highlights immuno-inflammatory and skin pigmentation genes.	Rosacea symptom severity	73,265 European ancestry individuals	NA	10q21.1	10	51648366	PRKG1	PRKG1			ENSG00000185532			rs118006792-C	rs118006792	0	118006792	intron_variant	0	NR	3e-06	5.52288		1.33594	[0.78-1.89] unit increase	Illumina [at least 950000] (imputed)	N	rosacea severity measurement	http://www.ebi.ac.uk/efo/EFO_0009180	GCST005790	Genome-wide genotyping array
Yes	2021-07-27	34101054	Nikopensius T	2021-06-08	Clin Rheumatol	www.ncbi.nlm.nih.gov/pubmed/34101054	Association analysis of juvenile idiopathic arthritis genetic susceptibility factors in Estonian patients.	Arthritis (juvenile idiopathic)	263 Estonian ancestry cases, 6,956 Estonian ancestry controls	NA	10q21.1	10	52003161	PRKG1	PRKG1			ENSG00000185532			rs2454539-?	rs2454539	0	2454539	intron_variant	0	NR	3e-06	5.52288		1.501	[1.261-1.787] unit increase	Illumina [16583468] (imputed)	N	juvenile idiopathic arthritis	http://www.ebi.ac.uk/efo/EFO_0002609	GCST012103	Genome-wide genotyping array
	2024-10-04	38965376	Carey CE	2024-07-04	Nat Hum Behav	www.ncbi.nlm.nih.gov/pubmed/38965376	Principled distillation of UK Biobank phenotype data reveals underlying structure in human variation.	BMI and adiposity (confirmatory factor analysis Factor 7)	338,590 European ancestry individuals	NA	10q21.1	10	51920325		PRKG1			ENSG00000185532			rs1937684-?	rs1937684	0	1937684	intron_variant	0	NR	1e-08	8				Affymetrix [13176603] (imputed)	N	body mass index	http://www.ebi.ac.uk/efo/EFO_0004340	GCST90309342	Genome-wide genotyping array
	2024-10-04	38965376	Carey CE	2024-07-04	Nat Hum Behav	www.ncbi.nlm.nih.gov/pubmed/38965376	Principled distillation of UK Biobank phenotype data reveals underlying structure in human variation.	Body size (confirmatory factor analysis Factor 21)	329,172 European ancestry individuals	NA	10q11.23	10	50993120		PRKG1			ENSG00000185532			rs10822055-?	rs10822055	0	10822055	intron_variant	0	NR	1e-12	12				Affymetrix [13176603] (imputed)	N	size	http://www.ebi.ac.uk/efo/EFO_0001695	GCST90309355	Genome-wide genotyping array
	2024-10-04	38965376	Carey CE	2024-07-04	Nat Hum Behav	www.ncbi.nlm.nih.gov/pubmed/38965376	Principled distillation of UK Biobank phenotype data reveals underlying structure in human variation.	Body size (confirmatory factor analysis Factor 21)	329,172 European ancestry individuals	NA	10q21.1	10	51531231		PRKG1			ENSG00000185532			rs61849823-?	rs61849823	0	61849823	intron_variant	0	NR	8e-14	13.0969				Affymetrix [13176603] (imputed)	N	size	http://www.ebi.ac.uk/efo/EFO_0001695	GCST90309355	Genome-wide genotyping array
	2021-01-26	32376654	Richardson TG	2020-05-06	BMJ	www.ncbi.nlm.nih.gov/pubmed/32376654	Use of genetic variation to separate the effects of early and later life adiposity on disease risk: mendelian randomisation study.	Adult body size	453,169 European ancestry individuals		10q21.1	10	51889671	PRKG1	PRKG1			ENSG00000185532			rs10823826-C	rs10823826	0	10823826	intron_variant	0	0.751302	2e-08	7.69897		0.00897916	[0.0059-0.0121] unit decrease	Affymetrix [12370749]	N	body height	http://purl.obolibrary.org/obo/OBA_VT0001253	GCST010988	Genome-wide genotyping array
	2022-02-15	35078996	Gudjonsson A	2022-01-25	Nat Commun	www.ncbi.nlm.nih.gov/pubmed/35078996	A genome-wide association study of serum proteins reveals shared loci with common diseases.	Serum levels of protein DKK4	5,349 Icelandic ancestry individuals	NA	10q21.1	10	51875766		PRKG1			ENSG00000185532			rs75580312-A	rs75580312	0	75580312	intron_variant	0	0.01414	7e-85	84.1549		1.49151	[1.34-1.64] unit increase	Illumina [7506463] (imputed)	N	Dickkopf-related protein 4 measurement	http://www.ebi.ac.uk/efo/EFO_0008110	GCST90088345	Genome-wide genotyping array
	2022-02-15	35078996	Gudjonsson A	2022-01-25	Nat Commun	www.ncbi.nlm.nih.gov/pubmed/35078996	A genome-wide association study of serum proteins reveals shared loci with common diseases.	Serum levels of protein DKK1	5,352 Icelandic ancestry individuals	NA	10q21.1	10	51875766		PRKG1			ENSG00000185532			rs75580312-A	rs75580312	0	75580312	intron_variant	0	0.01414	2e-95	94.699		1.58209	[1.43-1.73] unit increase	Illumina [7506463] (imputed)	N	dickkopf‚Äêrelated protein 1 measurement	http://www.ebi.ac.uk/efo/EFO_0010620	GCST90088437	Genome-wide genotyping array
	2021-09-08	33817668	Curtis SW	2021-04-01	HGG Adv	www.ncbi.nlm.nih.gov/pubmed/33817668	The PAX1 locus at 20p11 is a potential genetic modifier for bilateral cleft lip.	Bilateral cleft lip	15 Asian ancestry cases, 13 European ancestry cases, 15 Hispanic cases, 1 case, 161 Asian ancestry controls, 835 European ancestry controls, 626 Hispanic controls, 4 controls	NA	10q21.1	10	52051671	NR	PRKG1			ENSG00000185532			rs10824002-?	rs10824002	0	10824002	intron_variant	0	NR	4e-06	5.39794		3.7	[2.92-4.69]	Illumina [539000] (imputed)	N	cleft lip	http://www.ebi.ac.uk/efo/EFO_0003959	GCST012352	Genome-wide genotyping array
	2021-01-13	33414549	Demange PA	2021-01-07	Nat Genet	www.ncbi.nlm.nih.gov/pubmed/33414549	Investigating the genetic architecture of noncognitive skills using GWAS-by-subtraction.	Noncognitive aspects of educational attainment	510,795 European ancestry individuals	NA	10q21.1	10	51717197	NR	PRKG1			ENSG00000185532			rs74632204-G	rs74632204	0	74632204	intron_variant	0	0.0218688	5e-08	7.30103		0.130934	[0.084-0.178] unit decrease	Affymetrix, Illumina, Perlegen [7305956] (imputed)	N	self reported educational attainment	http://www.ebi.ac.uk/efo/EFO_0004784	GCST90011874	Genome-wide genotyping array
	2021-11-02	34446935	Karlsson Linner R	2021-08-26	Nat Neurosci	www.ncbi.nlm.nih.gov/pubmed/34446935	Multivariate analysis of 1.5 million people identifies genetic associations with traits related to self-regulation and addiction.	Externalizing behaviour (multivariate analysis)	up to 53,293 European ancestry Attention-deficit/hyperactivity disorder individuals, up to 164,684 European ancestry problematic alcohol use individuals, up to 186,875 European ancestry lifetime cannabis use individuals, up to 357,187 European ancestry individuals measuring reverse-coded age at first sexual intercourse, up to 336,121 European ancestry individuals measuring number of sexual partne…	NA	10q21.1	10	51331332		PRKG1			ENSG00000185532			rs72803194-C	rs72803194	0	72803194	intron_variant	0	0.709	2e-08	7.69897		0.007	[0.005-0.009] unit increase	NR [NR] (imputed)	N	social inhibition quality, attention deficit hyperactivity disorder, substance abuse	http://purl.obolibrary.org/obo/OBA_1000278, http://www.ebi.ac.uk/efo/EFO_0003888, http://purl.obolibrary.org/obo/MONDO_0002491	GCST90061435	Genome-wide genotyping array
	2018-11-12	30038396	Lee JJ	2018-07-23	Nat Genet	www.ncbi.nlm.nih.gov/pubmed/30038396	Gene discovery and polygenic prediction from a genome-wide association study of educational attainment in 1.1 million individuals.	Educational attainment (MTAG)	1,311,438 European ancestry individuals	NA	10q21.1	10	51920347	Intergenic	PRKG1			ENSG00000185532			rs12245197-T	rs12245197	0	12245197	intron_variant	0	0.4835	2e-08	7.69897	(MTAG)	0.0074	[0.0049-0.0099] unit decrease	Affymetrix, Illumina [7100000] (imputed)	N	self reported educational attainment	http://www.ebi.ac.uk/efo/EFO_0004784	GCST006571	Genome-wide genotyping array
	2018-11-12	30038396	Lee JJ	2018-07-23	Nat Genet	www.ncbi.nlm.nih.gov/pubmed/30038396	Gene discovery and polygenic prediction from a genome-wide association study of educational attainment in 1.1 million individuals.	Highest math class taken (MTAG)	811,539 European ancestry individuals	NA	10q21.1	10	51907683	Intergenic	PRKG1			ENSG00000185532			rs10823860-T	rs10823860	0	10823860	intron_variant	0	0.6998	3e-09	8.52288	(MTAG)	0.0107	[0.0072-0.0142] unit decrease	Affymetrix, Illumina [7100000] (imputed)	N	mathematical ability	http://www.ebi.ac.uk/efo/EFO_0004875	GCST006568	Genome-wide genotyping array
	2020-11-04	33097823	Pei YF	2020-10-23	Commun Biol	www.ncbi.nlm.nih.gov/pubmed/33097823	The genetic architecture of appendicular lean mass characterized by association analysis in the UK Biobank study.	Appendicular lean mass	450,243 European ancestry individuals	NA	10q11.23	10	50993120	PRKG1	PRKG1			ENSG00000185532			rs10822055-A	rs10822055	0	10822055	intron_variant	0	0.2349	2e-15	14.699		0.0177	[0.013-0.022] unit decrease	Affymetrix [18391927] (imputed)	N	appendicular lean mass	http://www.ebi.ac.uk/efo/EFO_0004980	GCST90000025	Genome-wide genotyping array
	2020-11-04	33097823	Pei YF	2020-10-23	Commun Biol	www.ncbi.nlm.nih.gov/pubmed/33097823	The genetic architecture of appendicular lean mass characterized by association analysis in the UK Biobank study.	Appendicular lean mass	450,243 European ancestry individuals	NA	10q21.1	10	51531231	PRKG1	PRKG1			ENSG00000185532			rs61849823-T	rs61849823	0	61849823	intron_variant	0	0.8357	3e-14	13.5229		0.0195	[0.014-0.025] unit decrease	Affymetrix [18391927] (imputed)	N	appendicular lean mass	http://www.ebi.ac.uk/efo/EFO_0004980	GCST90000025	Genome-wide genotyping array
	2020-11-04	33097823	Pei YF	2020-10-23	Commun Biol	www.ncbi.nlm.nih.gov/pubmed/33097823	The genetic architecture of appendicular lean mass characterized by association analysis in the UK Biobank study.	Appendicular lean mass	450,243 European ancestry individuals	NA	10q21.1	10	52062091	PRKG1	PRKG1			ENSG00000185532			rs77974561-A	rs77974561	0	77974561	intron_variant	0	0.0546	2e-11	10.699		0.0281	[0.02-0.036] unit decrease	Affymetrix [18391927] (imputed)	N	appendicular lean mass	http://www.ebi.ac.uk/efo/EFO_0004980	GCST90000025	Genome-wide genotyping array
Yes	2017-03-24	27723758	Bronson PG	2016-10-10	Nat Genet	www.ncbi.nlm.nih.gov/pubmed/27723758	Common variants at PVT1, ATG13-AMBRA1, AHI1 and CLEC16A are associated with selective IgA deficiency.	Selective IgA deficiency	1,635 European ancestry cases, 4,852 European ancestry controls	NA	10q21.1	10	51320749	MIR605	PRKG1			ENSG00000185532			rs12249467-A	rs12249467	0	12249467	intron_variant	0	NR	3e-06	5.52288		1.33	[NR]	Illumina [up to 9464381] (imputed)	N	selective IgA deficiency disease	http://www.ebi.ac.uk/efo/EFO_1001929	GCST003814	Genome-wide genotyping array
	2019-07-17	28552196	Tachmazidou I	2017-06-01	Am J Hum Genet	www.ncbi.nlm.nih.gov/pubmed/28552196	Whole-Genome Sequencing Coupled to Imputation Discovers Genetic Signals for Anthropometric Traits.	Body mass index	1,249 whole genome sequenced European ancestry individuals, 3,538 whole genome sequenced individuals, 46,635 European ancestry individuals, 472 Carlantino (founder/genetic isolate) individuals, 1,170 Friuli Venezia Giulia (founder/genetic isolate) individuals, 1,019 Mylopotamos (founder/genetic isolate) individuals, 932 Pomak (founder/genetic isolate) individuals, 1,778 Val Borbera (founder/genet…	209,191 European ancestry individuals	10q21.1	10	51102365	PRKG1	PRKG1			ENSG00000185532			rs762599689-A	rs762599689	0	762599689	intron_variant	0	0.0132	6e-06	5.22185		0.6985	[0.4-1] unit increase	Affymetrix, Illumina, Perlegen [15844966] (imputed)	N	body mass index	http://www.ebi.ac.uk/efo/EFO_0004340	GCST008158	Genome-wide genotyping array
	2019-07-17	28552196	Tachmazidou I	2017-06-01	Am J Hum Genet	www.ncbi.nlm.nih.gov/pubmed/28552196	Whole-Genome Sequencing Coupled to Imputation Discovers Genetic Signals for Anthropometric Traits.	Height	1,249 whole genome sequenced European ancestry individuals, 3,541 whole genome sequenced individuals, 46,910 European ancestry individuals, 471 Carlantino (founder/genetic isolate) individuals, 1,197 Friuli Venezia Giulia (founder/genetic isolate) individuals, 1,043 Mylopotamos (founder/genetic isolate) individuals, 933 Pomak (founder/genetic isolate) individuals, 1,785 Val Borbera (founder/genet…	205,003 European ancestry individuals	10q21.1	10	51530121	PRKG1	PRKG1			ENSG00000185532			rs10823137-A	rs10823137	0	10823137	intron_variant	0	0.7258	5e-06	5.30103		0.0329	[0.019-0.047] unit decrease	Affymetrix, Illumina, Perlegen [15844966] (imputed)	N	body height	http://purl.obolibrary.org/obo/OBA_VT0001253	GCST008163	Genome-wide genotyping array
	2018-01-29	29212778	van der Harst P	2017-12-06	Circ Res	www.ncbi.nlm.nih.gov/pubmed/29212778	Identification of 64 Novel Genetic Loci Provides an Expanded View on the Genetic Architecture of Coronary Artery Disease.	Coronary artery disease	88,192 cases, 162,544 controls	34,541 cases, 261,984 controls	10q21.1	10	51923587	PRKG1	PRKG1			ENSG00000185532			rs2879627-A	rs2879627	0	2879627	intron_variant	0	0.1961	3e-06	5.52288		0.0348	[0.02-0.05] unit increase	NR [8041861] (imputed)	N	coronary artery disease	http://www.ebi.ac.uk/efo/EFO_0001645	GCST005196	Genome-wide genotyping array
	2018-09-06	29967566	Roberts CH	2018-06-03	Mediators Inflamm	www.ncbi.nlm.nih.gov/pubmed/29967566	Pathway-Wide Genetic Risks in Chlamydial Infections Overlap between Tissue Tropisms: A Genome-Wide Association Scan.	Anti-chlamydia trachomatis IgG seropositivity	71 Dutch ancestry cases, 169 Dutch ancestry controls	NA	10q21.1	10	52129495	PRKG1	PRKG1			ENSG00000185532			rs12259288-A	rs12259288	0	12259288	intron_variant	0	0.667	6e-07	6.22185		1.23457		Illumina [9443221] (imputed)	N	Chlamydia trachomatis seropositivity	http://www.ebi.ac.uk/efo/EFO_0009330	GCST006225	Genome-wide genotyping array
	2020-09-16	32573913	Sherva R	2020-06-23	Alzheimers Dement	www.ncbi.nlm.nih.gov/pubmed/32573913	Genome-wide association study of rate of cognitive decline in Alzheimer's disease patients identifies novel genes and pathways.	Rate of cognitive decline in Alzheimer's disease	3,946 European ancestry cases	NA	10q21.1	10	51756590	NR	PRKG1			ENSG00000185532			rs181259817-C	rs181259817	0	181259817	intron_variant	0	NR	4e-06	5.39794	(GEE model)	0.92002	[0.53-1.31] unit decrease	NR [NR] (imputed)	N	cognitive decline measurement	http://www.ebi.ac.uk/efo/EFO_0007710	GCST010567	Genome-wide genotyping array
	2020-09-04	32472697	Verma SS	2020-05-30	Clin Pharmacol Ther	www.ncbi.nlm.nih.gov/pubmed/32472697	Genome-wide association study of platelet reactivity and cardiovascular response in patients treated with clopidogrel: a study by the International Clopidogrel Pharmacogenomics Consortium (ICPC).	Cardiovascular death, myocardial infarction or stroke in response to clopidogrel treatment	72 European ancestry cases, 1,375 European ancestry controls	NA	10q21.1	10	51474417	NA	PRKG1			ENSG00000185532			rs7086422-T	rs7086422	0	7086422	intron_variant	0	0.737762	8e-06	5.09691		2.26193	NR	Illumina [5009928] (imputed)	N	stroke, response to clopidogrel, cardiovascular event measurement	http://www.ebi.ac.uk/efo/EFO_0000712, http://purl.obolibrary.org/obo/GO_1903493, http://www.ebi.ac.uk/efo/EFO_0006919	GCST010483	Genome-wide genotyping array
	2021-05-27	33109212	Chang H	2020-10-28	BMC Med	www.ncbi.nlm.nih.gov/pubmed/33109212	Genetic architecture of cardiometabolic risks in people living with HIV.	LDL cholesterol levels in HIV infection	3,095 European ancestry individuals, 3,189 African American individuals	NA	10q21.1	10	52110815	PRKG1	PRKG1			ENSG00000185532			rs3862583-?	rs3862583	0	3862583	intron_variant	0	NR	6e-06	5.22185	(EA)	0.222631	[0.13-0.32] unit decrease	Illumina [13620258] (imputed)	N	low density lipoprotein cholesterol measurement	http://www.ebi.ac.uk/efo/EFO_0004611	GCST011741	Genome-wide genotyping array
	2021-05-27	33109212	Chang H	2020-10-28	BMC Med	www.ncbi.nlm.nih.gov/pubmed/33109212	Genetic architecture of cardiometabolic risks in people living with HIV.	LDL cholesterol levels in HIV infection	3,095 European ancestry individuals, 3,189 African American individuals	NA	10q21.1	10	52110815	PRKG1	PRKG1			ENSG00000185532			rs3862583-?	rs3862583	0	3862583	intron_variant	0	NR	6e-06	5.22185	(African American)	0.222631	[0.13-0.32] unit decrease	Illumina [13620258] (imputed)	N	low density lipoprotein cholesterol measurement	http://www.ebi.ac.uk/efo/EFO_0004611	GCST011741	Genome-wide genotyping array
	2024-10-23	39375568	Sidorenko J	2024-10-07	Nat Genet	www.ncbi.nlm.nih.gov/pubmed/39375568	Genetic architecture reconciles linkage and association studies of complex traits.	Body mass index	650,000 European ancestry individuals	NA	10q21.1	10	51920325		PRKG1			ENSG00000185532			rs1937684-T	rs1937684	0	1937684	intron_variant	0	0.3407	2e-08	7.69897		0.0109	[0.0072-0.0146] unit decrease	NR [1008385] (imputed)	N	body mass index	http://www.ebi.ac.uk/efo/EFO_0004340	GCST90446645	Genome-wide genotyping array
	2023-02-13	36502284	Yu XH	2022-12-10	Obesity (Silver Spring)	www.ncbi.nlm.nih.gov/pubmed/36502284	Body surface area is a potential obesity index: Its genetic determination and its causality for later-life diseases.	Body surface area	337,198 British ancestry individuals	NA	10q11.23	10	51002489		PRKG1			ENSG00000185532			rs10995318-?	rs10995318	0	10995318	intron_variant	0	NR	4e-10	9.39794		0.00295347	[0.002-0.0039] unit decrease	NR [9428408] (imputed)	N	body surface area	http://www.ebi.ac.uk/efo/EFO_0022196	GCST90245995	Genome-wide genotyping array
	2023-02-13	36502284	Yu XH	2022-12-10	Obesity (Silver Spring)	www.ncbi.nlm.nih.gov/pubmed/36502284	Body surface area is a potential obesity index: Its genetic determination and its causality for later-life diseases.	Body surface area	337,198 British ancestry individuals	NA	10q21.1	10	51531231		PRKG1			ENSG00000185532			rs61849823-?	rs61849823	0	61849823	intron_variant	0	NR	5e-10	9.30103		0.0034409	[0.0024-0.0045] unit increase	NR [9428408] (imputed)	N	body surface area	http://www.ebi.ac.uk/efo/EFO_0022196	GCST90245995	Genome-wide genotyping array
	2022-12-14	36477530	Saunders GRB	2022-12-07	Nature	www.ncbi.nlm.nih.gov/pubmed/36477530	Genetic diversity fuels gene discovery for tobacco and alcohol use.	Smoking initiation	3,382,012 European ancestry, East Asian ancestry, Hispanic or Latin American, African ancestry individuals	NA	10q21.1	10	51336356		PRKG1			ENSG00000185532			rs11818460-C	rs11818460	0	11818460	intron_variant	0	0.298	3e-14	13.5229		0.00665	[0.0049-0.0084] unit decrease	NR [NR] (imputed)	N	smoking initiation	http://www.ebi.ac.uk/efo/EFO_0005670	GCST90243985	Genome-wide genotyping array, Genome-wide sequencing
	2022-12-14	36477530	Saunders GRB	2022-12-07	Nature	www.ncbi.nlm.nih.gov/pubmed/36477530	Genetic diversity fuels gene discovery for tobacco and alcohol use.	Smoking initiation	3,382,012 European ancestry, East Asian ancestry, Hispanic or Latin American, African ancestry individuals	NA	10q21.1	10	51961416		PRKG1			ENSG00000185532			rs1903960-G	rs1903960	0	1903960	intron_variant	0	0.252	7e-15	14.1549		0.0069	[0.0052-0.0086] unit decrease	NR [NR] (imputed)	N	smoking initiation	http://www.ebi.ac.uk/efo/EFO_0005670	GCST90243985	Genome-wide genotyping array, Genome-wide sequencing
	2022-12-21	36477530	Saunders GRB	2022-12-07	Nature	www.ncbi.nlm.nih.gov/pubmed/36477530	Genetic diversity fuels gene discovery for tobacco and alcohol use.	Smoking initiation	2,669,029 European ancestry individuals	NA	10q21.1	10	51336356		PRKG1			ENSG00000185532			rs11818460-C	rs11818460	0	11818460	intron_variant	0	0.299	8e-12	11.0969		0.00656	[0.0047-0.0084] unit decrease	NR [NR] (imputed)	N	smoking initiation	http://www.ebi.ac.uk/efo/EFO_0005670	GCST90243968	Genome-wide genotyping array, Genome-wide sequencing
	2022-12-21	36477530	Saunders GRB	2022-12-07	Nature	www.ncbi.nlm.nih.gov/pubmed/36477530	Genetic diversity fuels gene discovery for tobacco and alcohol use.	Smoking initiation	2,669,029 European ancestry individuals	NA	10q21.1	10	51915035		PRKG1			ENSG00000185532			rs1892368-A	rs1892368	0	1892368	intron_variant	0	0.669	1e-14	14		0.00708	[0.0053-0.0089] unit increase	NR [NR] (imputed)	N	smoking initiation	http://www.ebi.ac.uk/efo/EFO_0005670	GCST90243968	Genome-wide genotyping array, Genome-wide sequencing
	2023-02-09	36224396	Yengo L	2022-10-12	Nature	www.ncbi.nlm.nih.gov/pubmed/36224396	A saturated map of common genetic variants associated with human height.	Height	472,730 East Asian ancestry individuals	NA	10q11.23	10	51007414		PRKG1			ENSG00000185532			rs10995339-C	rs10995339	0	10995339	intron_variant	0	0.4931	2e-11	10.699		0.0159	[0.011-0.021] unit increase	Affymetrix, Illumina [1385132] (imputed)	N	body height	http://purl.obolibrary.org/obo/OBA_VT0001253	GCST90245845	Genome-wide genotyping array
	2023-05-11	37106081	Schoeler T	2023-04-27	Nat Hum Behav	www.ncbi.nlm.nih.gov/pubmed/37106081	Participation bias in the UK Biobank distorts genetic associations and downstream analyses.	Age when finished full-time education (standard GWA)	283,749 European ancestry individuals	NA	10q21.1	10	51920339		PRKG1			ENSG00000185532			rs12259464-A	rs12259464	0	12259464	intron_variant	0	NR	2e-08	7.69897		0.024851	[0.016-0.034] unit decrease	NR [7296935] (imputed)	N	self reported educational attainment	http://www.ebi.ac.uk/efo/EFO_0004784	GCST90267280	Genome-wide genotyping array
	2023-03-09	36566681	Haghighatfard A	2022-12-23	Res Dev Disabil	www.ncbi.nlm.nih.gov/pubmed/36566681	The first genome-wide association study of internet addiction; Revealed substantial shared risk factors with neurodevelopmental psychiatric disorders.	Internet addiction disorder	16,520 Persian, Kurdish, Arab or Armenian ancestry cases, 18,000 Persian, Kurdish, Arab or Armenian ancestry controls	NA	10q21.1	10	51311193		PRKG1			ENSG00000185532			rs7898516-?	rs7898516	0	7898516	intron_variant	0	NR	3e-08	7.52288	(GC-adjusted)	1.12		NR [183649]	N	internet addiction disorder	http://www.ebi.ac.uk/efo/EFO_0803368	GCST90255366	Genome-wide genotyping array
	2023-03-09	36566681	Haghighatfard A	2022-12-23	Res Dev Disabil	www.ncbi.nlm.nih.gov/pubmed/36566681	The first genome-wide association study of internet addiction; Revealed substantial shared risk factors with neurodevelopmental psychiatric disorders.	Internet addiction disorder	16,520 Persian, Kurdish, Arab or Armenian ancestry cases, 18,000 Persian, Kurdish, Arab or Armenian ancestry controls	NA	10q21.1	10	51922034		PRKG1			ENSG00000185532			rs11000137-?	rs11000137	0	11000137	intron_variant	0	NR	4e-08	7.39794	(GC-adjusted)	0.55		NR [183649]	N	internet addiction disorder	http://www.ebi.ac.uk/efo/EFO_0803368	GCST90255366	Genome-wide genotyping array
	2023-05-11	37106081	Schoeler T	2023-04-27	Nat Hum Behav	www.ncbi.nlm.nih.gov/pubmed/37106081	Participation bias in the UK Biobank distorts genetic associations and downstream analyses.	Height (standard GWA)	283,749 European ancestry individuals	NA	10q21.1	10	51488446		PRKG1			ENSG00000185532			rs10997777-T	rs10997777	0	10997777	intron_variant	0	NR	2e-11	10.699		0.13245	[0.094-0.171] unit increase	NR [7296935] (imputed)	N	body height	http://purl.obolibrary.org/obo/OBA_VT0001253	GCST90267284	Genome-wide genotyping array
	2023-03-08	36581621	Huang J	2022-12-29	Nat Commun	www.ncbi.nlm.nih.gov/pubmed/36581621	Genomics and phenomics of body mass index reveals a complex disease network.	Body mass index	1,122,049 European ancestry individuals	NA	10q21.1	10	51920325		PRKG1			ENSG00000185532			rs1937684-T	rs1937684	0	1937684	intron_variant	0	NR	3e-10	9.52288		0.0101	[0.007-0.0132] unit decrease	Affymetrix [NR] (imputed)	N	body mass index	http://www.ebi.ac.uk/efo/EFO_0004340	GCST90255621	Genome-wide genotyping array
	2023-03-08	36581621	Huang J	2022-12-29	Nat Commun	www.ncbi.nlm.nih.gov/pubmed/36581621	Genomics and phenomics of body mass index reveals a complex disease network.	Body mass index	1,122,049 European ancestry individuals	NA	10q21.1	10	51924211		PRKG1			ENSG00000185532			rs79782488-C	rs79782488	0	79782488	intron_variant	0	NR	1e-09	9		0.0211	[0.014-0.028] unit decrease	Affymetrix [NR] (imputed)	N	body mass index	http://www.ebi.ac.uk/efo/EFO_0004340	GCST90255621	Genome-wide genotyping array
	2023-01-06	36210801	Asiimwe IG	2022-09-23	Front Pharmacol	www.ncbi.nlm.nih.gov/pubmed/36210801	A genome-wide association study of plasma concentrations of warfarin enantiomers and metabolites in sub-Saharan black-African patients.	S-6-hydroxywarfarin levels	260 Sub-Saharan African ancestry individuals	NA	10q21.1	10	52023485		PRKG1			ENSG00000185532			rs183328674-?	rs183328674	0	183328674	intron_variant	0	NR	8e-07	6.09691		1.74248	[1.07-2.42] unit increase	Illumina [17259403] (imputed)	N	S-6-hydroxywarfarin measurement	http://www.ebi.ac.uk/efo/EFO_0803326	GCST90129565	Genome-wide genotyping array
	2023-01-06	36210801	Asiimwe IG	2022-09-23	Front Pharmacol	www.ncbi.nlm.nih.gov/pubmed/36210801	A genome-wide association study of plasma concentrations of warfarin enantiomers and metabolites in sub-Saharan black-African patients.	RS-6-hydroxywarfarin levels	233 Sub-Saharan African ancestry individuals	NA	10q21.1	10	51533143		PRKG1			ENSG00000185532			rs73339939-?	rs73339939	0	73339939	intron_variant	0	NR	7e-06	5.1549		1.07804	[0.62-1.54] unit increase	Illumina [17245627] (imputed)	N	RS-6-hydroxywarfarin measurement	http://www.ebi.ac.uk/efo/EFO_0803328	GCST90129567	Genome-wide genotyping array
	2023-01-09	35224516	Thibord F	2022-02-22	HGG Adv	www.ncbi.nlm.nih.gov/pubmed/35224516	A year of COVID-19 GWAS results from the GRASP portal reveals potential genetic risk factors.	COVID-19 (covid vs negative)	1,930 South Asian, African or unknown ancestry cases, 4,609 South Asian, African or unknown ancestry controls	NA	10q21.1	10	51130138		PRKG1			ENSG00000185532			rs58268608-C	rs58268608	0	58268608	intron_variant	0	0.0433685	1e-05	5		0.43482	[0.24-0.63] unit decrease	NR [13780021] (imputed)	N	COVID-19	http://purl.obolibrary.org/obo/MONDO_0100096	GCST90104733	Genome-wide genotyping array
	2022-12-12	36376304	Koskeridis F	2022-11-14	Nat Commun	www.ncbi.nlm.nih.gov/pubmed/36376304	Pleiotropic genetic architecture and novel loci for C-reactive protein levels.	Body mass index (MTAG)	694,649 European ancestry individuals	NA	10q21.1	10	51917553		PRKG1			ENSG00000185532			rs10823893-A	rs10823893	0	10823893	intron_variant	0	NR	1e-10	10		0.013536	[0.0094-0.0177] unit increase	NR [6206408] (imputed)	N	body mass index	http://www.ebi.ac.uk/efo/EFO_0004340	GCST90179150	Genome-wide genotyping array
	2023-01-09	35224516	Thibord F	2022-02-22	HGG Adv	www.ncbi.nlm.nih.gov/pubmed/35224516	A year of COVID-19 GWAS results from the GRASP portal reveals potential genetic risk factors.	COVID-19 (severe vs population)	387 European ancestry female cases, 248,912 European ancestry female controls, 52 female cases, 14,878 female controls	NA	10q21.1	10	51487814		PRKG1			ENSG00000185532			rs17540215-G	rs17540215	0	17540215	intron_variant	0	0.109445	6e-06	5.22185		0.52084	[0.29-0.75] unit increase	NR [9866514] (imputed)	N	COVID-19	http://purl.obolibrary.org/obo/MONDO_0100096	GCST90104756	Genome-wide genotyping array
	2020-04-17	31669095	Zhu Z	2019-10-24	J Allergy Clin Immunol	www.ncbi.nlm.nih.gov/pubmed/31669095	Shared Genetic and Experimental Links between Obesity-Related Traits and Asthma Subtypes in UK Biobank.	Body mass index	457,822 European ancestry individuals	NA	10q21.1	10	51913526	NR	PRKG1			ENSG00000185532			rs4595495-?	rs4595495	0	4595495	intron_variant	0	NR	7e-12	11.1549				Affymetrix [~ 8270000] (imputed)	N	body mass index	http://www.ebi.ac.uk/efo/EFO_0004340	GCST009871	Genome-wide genotyping array
	2020-04-17	31669095	Zhu Z	2019-10-24	J Allergy Clin Immunol	www.ncbi.nlm.nih.gov/pubmed/31669095	Shared Genetic and Experimental Links between Obesity-Related Traits and Asthma Subtypes in UK Biobank.	Body mass index	457,822 European ancestry individuals	NA	10q21.1	10	51924211	NR	PRKG1			ENSG00000185532			rs79782488-?	rs79782488	0	79782488	intron_variant	0	NR	1e-08	8				Affymetrix [~ 8270000] (imputed)	N	body mass index	http://www.ebi.ac.uk/efo/EFO_0004340	GCST009871	Genome-wide genotyping array
	2019-03-25	30704525	Guyatt AL	2019-01-31	Hum Genomics	www.ncbi.nlm.nih.gov/pubmed/30704525	A genome-wide association study of mitochondrial DNA copy number in two population-based cohorts.	Mitochondrial DNA copy number	3,647 European ancestry children	NA	10q21.1	10	51442584	PRKG1	PRKG1			ENSG00000185532			rs16918171-C	rs16918171	0	16918171	intron_variant	0	NR	6e-07	6.22185		0.448	[0.27-0.62] unit decrease	Illumina [7410776] (imputed)	N	mitochondrial DNA measurement	http://www.ebi.ac.uk/efo/EFO_0006312	GCST007393	Genome-wide genotyping array
	2021-07-01	33037222	Sieh W	2020-10-09	Nat Commun	www.ncbi.nlm.nih.gov/pubmed/33037222	Identification of 31 loci for mammographic density phenotypes and their associations with breast cancer risk.	Mammographic density (dense area)	24,192 European ancestry individuals	NA	10q21.1	10	51915035		PRKG1			ENSG00000185532			rs1892368-?	rs1892368	0	1892368	intron_variant	0	NR	2e-08	7.69897		0.051	[0.033-0.069] unit decrease	Affymetrix [9906178] (imputed)	N	mammographic density measurement	http://www.ebi.ac.uk/efo/EFO_0005941	GCST90011731	Genome-wide genotyping array
	2021-07-01	33037222	Sieh W	2020-10-09	Nat Commun	www.ncbi.nlm.nih.gov/pubmed/33037222	Identification of 31 loci for mammographic density phenotypes and their associations with breast cancer risk.	Percent mammographic density	24,192 European ancestry individuals	NA	10q21.1	10	51915035		PRKG1			ENSG00000185532			rs1892368-?	rs1892368	0	1892368	intron_variant	0	NR	3e-06	5.52288		0.035	[0.019-0.051] unit decrease	Affymetrix [9906178] (imputed)	N	mammographic density percentage	http://www.ebi.ac.uk/efo/EFO_0006502	GCST90011733	Genome-wide genotyping array
	2021-05-18	32902719	Hebbar P	2020-09-09	Hum Genet	www.ncbi.nlm.nih.gov/pubmed/32902719	Genome-wide landscape establishes novel association signals for metabolic traits in the Arab population.	Systolic blood pressure	2,732 Kuwaiti ancestry individuals	NA	10q21.1	10	51562944	PRKG1	PRKG1			ENSG00000185532			rs113532758-?	rs113532758	0	113532758	intron_variant	0	NR	9e-08	7.04576		5.339	NR unit decrease	Illumina [up to 1520000] (imputed)	N	systolic blood pressure	http://www.ebi.ac.uk/efo/EFO_0006335	GCST011687	Genome-wide genotyping array, Targeted genotyping array
	2024-08-30	39134668	Shi S	2024-08-12	Nat Genet	www.ncbi.nlm.nih.gov/pubmed/39134668	A Genomics England haplotype reference panel and imputation of UK Biobank.	Height	404,900 European ancestry individuals	NA	10q21.1	10	51531231		PRKG1			ENSG00000185532			rs61849823-?	rs61849823	0	61849823	intron_variant	0	NR	1e-21	21		0.0223435	[0.018-0.027] unit increase	Affymetrix [162050642] (imputed)	N	body height	http://purl.obolibrary.org/obo/OBA_VT0001253	GCST90435412	Genome-wide genotyping array
	2024-08-30	39134668	Shi S	2024-08-12	Nat Genet	www.ncbi.nlm.nih.gov/pubmed/39134668	A Genomics England haplotype reference panel and imputation of UK Biobank.	Height	404,900 European ancestry individuals	NA	10q11.23	10	51023552		PRKG1			ENSG00000185532			rs16912746-?	rs16912746	0	16912746	intron_variant	0	NR	2e-24	23.699		0.0201604	[0.016-0.024] unit decrease	Affymetrix [162050642] (imputed)	N	body height	http://purl.obolibrary.org/obo/OBA_VT0001253	GCST90435412	Genome-wide genotyping array
	2022-07-13	35501403	Yang W	2022-05-02	Commun Biol	www.ncbi.nlm.nih.gov/pubmed/35501403	Genome-wide association and Mendelian randomization study of blood copper levels and 213 deep phenotypes in humans.	Plasma selenium levels	688 East Asian ancestry individuals	NA	10q21.1	10	51726962		PRKG1			ENSG00000185532			rs10740328-A	rs10740328	0	10740328	intron_variant	0	0.251	6e-06	5.22185		0.308	[0.17-0.44] unit decrease	Illumina [4338913] (imputed)	N	serum selenium amount	http://purl.obolibrary.org/obo/OBA_2050059	GCST90100553	Genome-wide genotyping array
	2022-09-01	31882771	Al-Khelaifi F	2019-12-27	Sci Rep	www.ncbi.nlm.nih.gov/pubmed/31882771	Metabolic GWAS of elite athletes reveals novel genetically-influenced metabolites associated with athletic performance.	Glycosyl ceramide (d18:2/24:1, d18:1/24:2) levels in elite athletes	490 individuals	NA	10q21.1	10	51616113		PRKG1			ENSG00000185532			rs12769516-?	rs12769516	0	12769516	intron_variant	0	NR	5e-07	6.30103		1.26671	[0.78-1.75] unit decrease	Illumina [275016]	N	lipid measurement	http://www.ebi.ac.uk/efo/EFO_0004529	GCST90133961	Genome-wide genotyping array
	2022-09-01	31882771	Al-Khelaifi F	2019-12-27	Sci Rep	www.ncbi.nlm.nih.gov/pubmed/31882771	Metabolic GWAS of elite athletes reveals novel genetically-influenced metabolites associated with athletic performance.	5-oxoproline levels in elite athletes	490 individuals	NA	10q21.1	10	51675677		PRKG1			ENSG00000185532			rs60886099-?	rs60886099	0	60886099	intron_variant	0	NR	1e-07	7		0.469288	[0.3-0.64] unit decrease	Illumina [275016]	N	5-oxoproline measurement	http://www.ebi.ac.uk/efo/EFO_0010988	GCST90133729	Genome-wide genotyping array
	2022-09-01	31882771	Al-Khelaifi F	2019-12-27	Sci Rep	www.ncbi.nlm.nih.gov/pubmed/31882771	Metabolic GWAS of elite athletes reveals novel genetically-influenced metabolites associated with athletic performance.	Gamma-glutamylleucine levels in elite athletes	490 individuals	NA	10q21.1	10	52045600		PRKG1			ENSG00000185532			rs6480687-?	rs6480687	0	6480687	intron_variant	0	NR	1e-05	5		0.258061	[0.14-0.37] unit increase	Illumina [275016]	N	gamma-glutamylleucine measurement	http://www.ebi.ac.uk/efo/EFO_0021140	GCST90133889	Genome-wide genotyping array
	2022-09-01	31882771	Al-Khelaifi F	2019-12-27	Sci Rep	www.ncbi.nlm.nih.gov/pubmed/31882771	Metabolic GWAS of elite athletes reveals novel genetically-influenced metabolites associated with athletic performance.	Arachidonoylcarnitine (C20:4) levels in elite athletes	490 individuals	NA	10q21.1	10	51115518		PRKG1			ENSG00000185532			rs150615394-?	rs150615394	0	150615394	intron_variant	0	NR	9e-06	5.04576		1.26176	[0.71-1.81] unit increase	Illumina [275016]	N	lipid measurement	http://www.ebi.ac.uk/efo/EFO_0004529	GCST90133874	Genome-wide genotyping array
	2022-09-01	31882771	Al-Khelaifi F	2019-12-27	Sci Rep	www.ncbi.nlm.nih.gov/pubmed/31882771	Metabolic GWAS of elite athletes reveals novel genetically-influenced metabolites associated with athletic performance.	Isovalerylcarnitine (C5) levels in elite athletes	490 individuals	NA	10q21.1	10	51859782		PRKG1			ENSG00000185532			rs7920387-?	rs7920387	0	7920387	intron_variant	0	NR	7e-06	5.1549		0.593137	[0.34-0.85] unit decrease	Illumina [275016]	N	amino acid measurement	http://www.ebi.ac.uk/efo/EFO_0005134	GCST90133566	Genome-wide genotyping array
	2022-09-01	31882771	Al-Khelaifi F	2019-12-27	Sci Rep	www.ncbi.nlm.nih.gov/pubmed/31882771	Metabolic GWAS of elite athletes reveals novel genetically-influenced metabolites associated with athletic performance.	Maleate levels in elite athletes	490 individuals	NA	10q21.1	10	51675677		PRKG1			ENSG00000185532			rs60886099-?	rs60886099	0	60886099	intron_variant	0	NR	8e-06	5.09691		0.426247	[0.24-0.61] unit increase	Illumina [275016]	N	maleate measurement	http://www.ebi.ac.uk/efo/EFO_0010509	GCST90133996	Genome-wide genotyping array
	2022-09-01	31882771	Al-Khelaifi F	2019-12-27	Sci Rep	www.ncbi.nlm.nih.gov/pubmed/31882771	Metabolic GWAS of elite athletes reveals novel genetically-influenced metabolites associated with athletic performance.	Lactosyl-N-nervonoyl-sphingosine (d18:1/24:1) levels in elite athletes	490 individuals	NA	10q21.1	10	51156413		PRKG1			ENSG00000185532			rs7893773-?	rs7893773	0	7893773	intron_variant	0	NR	6e-06	5.22185		0.286951	[0.16-0.41] unit decrease	Illumina [275016]	N	lipid measurement	http://www.ebi.ac.uk/efo/EFO_0004529	GCST90133978	Genome-wide genotyping array
	2023-11-10	37673066	Chen WC	2023-08-29	Am J Hum Genet	www.ncbi.nlm.nih.gov/pubmed/37673066	Genome-wide association study of esophageal squamous cell cancer identifies shared and distinct risk variants in African and Chinese populations.	Esophageal squamous cell carcinoma	1,686 Sub-Saharan African ancestry cases, 3,217 Sub-Saharan African ancestry controls	NA	10q21.1	10	51553698		PRKG1			ENSG00000185532			rs143380404-G	rs143380404	0	143380404	intron_variant	0	0.02	3e-06	5.52288		1.75	[1.596-1.904]	Illumina [13256833] (imputed)	N	esophageal squamous cell carcinoma	http://www.ebi.ac.uk/efo/EFO_0005922	GCST90271955	Genome-wide genotyping array
	2022-10-24	36168886	Thareja G	2022-09-28	Hum Mol Genet	www.ncbi.nlm.nih.gov/pubmed/36168886	Differences and commonalities in the genetic architecture of protein quantitative trait loci in European and Arab populations.	Neutral ceramidase levels	2,935 Qatari ancestry individuals	NA	10q21.1	10	51240396		PRKG1			ENSG00000185532			rs139632655-A	rs139632655	0	139632655	intron_variant	0	0.0115843	3e-15	14.5229		0.973987	[0.73-1.22] unit increase	NR [10004359]	N	neutral ceramidase measurement	http://www.ebi.ac.uk/efo/EFO_0008247	GCST90161676	Genome-wide sequencing
	2022-10-24	36168886	Thareja G	2022-09-28	Hum Mol Genet	www.ncbi.nlm.nih.gov/pubmed/36168886	Differences and commonalities in the genetic architecture of protein quantitative trait loci in European and Arab populations.	Neutral ceramidase levels	2,935 Qatari ancestry individuals	NA	10q21.1	10	51571501		PRKG1			ENSG00000185532			rs187358946-T	rs187358946	0	187358946	intron_variant	0	0.0127768	3e-11	10.5229		0.826052	[0.58-1.07] unit decrease	NR [10004359]	N	neutral ceramidase measurement	http://www.ebi.ac.uk/efo/EFO_0008247	GCST90161676	Genome-wide sequencing
	2024-01-09	37492107	Wu Y	2023-06-05	Cell Genom	www.ncbi.nlm.nih.gov/pubmed/37492107	150 risk variants for diverticular disease of intestine prioritize cell types and enable polygenic prediction of disease susceptibility.	Diverticular disease	56,355 European ancestry cases, 398,413 European ancestry controls	NA	10q21.1	10	51492420		PRKG1			ENSG00000185532			rs1926209-T	rs1926209	0	1926209	intron_variant	0	0.68	5e-10	9.30103		0.04	[0.028-0.052] unit increase	NR [7462386] (imputed)	N	diverticular disease	http://www.ebi.ac.uk/efo/EFO_0009959	GCST90301393	Genome-wide genotyping array
	2023-12-07	35915156	Tcheandjieu C	2022-08-01	Nat Med	www.ncbi.nlm.nih.gov/pubmed/35915156	Large-scale genome-wide association study of coronary artery disease in genetically diverse populations.	Coronary artery disease	27,021 African American or Afro-Caribbean cases, 102,305 African American or Afro-Caribbean controls	NA	10q21.1	10	51714986		PRKG1			ENSG00000185532			rs113926709-?	rs113926709	0	113926709	intron_variant	0	NR	5e-06	5.30103		0.209	[0.12-0.3] unit increase	Affymetrix [NR] (imputed)	N	coronary artery disease	http://www.ebi.ac.uk/efo/EFO_0001645	GCST90132304	Genome-wide genotyping array
	2023-12-11	37280435	Hawkes G	2023-06-06	Diabetologia	www.ncbi.nlm.nih.gov/pubmed/37280435	Genetic evidence that high BMI in childhood has a protective effect on intermediate diabetes traits, including measures of insulin sensitivity and secretion, after accounting for BMI in adulthood.	Body mass index	441,761 European ancestry individuals	NA	10q21.1	10	51913526		PRKG1			ENSG00000185532			rs4595495-A	rs4595495	0	4595495	intron_variant	0	NR	4e-12	11.3979		0.0134956	[0.0097-0.0173] unit decrease	NR [NR] (imputed)	N	body mass index	http://www.ebi.ac.uk/efo/EFO_0004340	GCST90301650	Genome-wide genotyping array
	2023-12-12	37359372	Nardone GG	2023-06-09	Front Genet	www.ncbi.nlm.nih.gov/pubmed/37359372	Identifying missing pieces in color vision defects: a genome-wide association study in Silk Road populations.	Color vision defects (Tritan)	12 Silk Road (founder/genetic isolate) cases, 508 Silk Road (founder/genetic isolate) controls	NA	10q21.1	10	51211800		PRKG1			ENSG00000185532			rs147734981-C	rs147734981	0	147734981	intron_variant	0	0.983	3e-07	6.52288		0.218864	[0.14-0.3] unit decrease	Illumina [7783479] (imputed)	N	color vision disorder	http://purl.obolibrary.org/obo/MONDO_0001703	GCST90301671	Genome-wide genotyping array
	2025-03-26	36810956	Foss-Skiftesvik J	2023-02-22	Neuro Oncol	www.ncbi.nlm.nih.gov/pubmed/36810956	Multi-ancestry genome-wide association study of 4,069 children with glioma identifies 9p21.3 risk locus.	Oligodendroglioma	90 European ancestry cases, 7,183 European ancestry controls, 28 Hispanic or Latin American cases, 1,177 Hispanic or Latin American controls, 6 African American or Afro-Caribbean cases, 196 African American or Afro-Caribbean controls, 6 African ancestry cases, 196 African ancestry controls, 2 Asian ancestry cases, 222 Asian ancestry controls	NA	10q21.1	10	51680700		PRKG1			ENSG00000185532			rs10998875-?	rs10998875	0	10998875	intron_variant	0	NR	6e-06	5.22185		4.16243	[2.245427666-7.716060995]	Affymetrix, Illumina [11212017] (imputed)	N	oligodendroglioma	http://www.ebi.ac.uk/efo/EFO_0000632	GCST90296472	Genome-wide genotyping array
	2024-12-11	38317187	Akinyemi RO	2024-02-05	Genome Med	www.ncbi.nlm.nih.gov/pubmed/38317187	Novel functional insights into ischemic stroke biology provided by the first genome-wide association study of stroke in indigenous Africans.	Ischemic stroke	1,683 West African ancestry cases, 1,738 West African ancestry controls, 2,051 African American cases, 16,579 African American controls	NA	10q21.1	10	51787504		PRKG1			ENSG00000185532			rs74469072-?	rs74469072	0	74469072	intron_variant	0	NR	7e-07	6.1549				Illumina [14053108] (imputed)	N	Ischemic stroke	http://purl.obolibrary.org/obo/HP_0002140	GCST90482715	Genome-wide genotyping array
	2025-01-08	39715877	Akimova ET	2024-12-23	Nat Hum Behav	www.ncbi.nlm.nih.gov/pubmed/39715877	Polygenic prediction of occupational status GWAS elucidates genetic and environmental interplay in intergenerational transmission, careers and health in UK Biobank.	CAMSIS occupational score (MTAG)	273,157 British ancestry individuals	NA	10q21.1	10	51920347		PRKG1			ENSG00000185532			rs12245197-?	rs12245197	0	12245197	intron_variant	0	NR	5e-08	7.30103		0.00926655	[0.0059-0.0126] unit decrease	NR [NR] (imputed)	N	socioeconomic status	http://www.ebi.ac.uk/efo/EFO_0022866	GCST90492678	Genome-wide genotyping array
	2025-01-06	39024449	Verma A	2024-07-19	Science	www.ncbi.nlm.nih.gov/pubmed/39024449	Diversity and scale: Genetic architecture of 2068 traits in the VA Million Veteran Program.	Height (maximum, inv-normal transformed)	119,011 African American or Afro-Caribbean individuals, 57,810 Hispanic or Latin American individuals, 6,384 East Asian ancestry individuals, 424,305 European ancestry individuals	NA	10q21.1	10	51531231		PRKG1			ENSG00000185532			rs61849823-T	rs61849823	0	61849823	intron_variant	0	0.8672	5e-14	13.301		0.042	[0.031-0.053] unit decrease	NR [44300000] (imputed)	N	body height	http://purl.obolibrary.org/obo/OBA_VT0001253	GCST90479634	Genome-wide genotyping array
	2025-01-06	39024449	Verma A	2024-07-19	Science	www.ncbi.nlm.nih.gov/pubmed/39024449	Diversity and scale: Genetic architecture of 2068 traits in the VA Million Veteran Program.	height (mean, inv-normal transformed)	119,012 African American or Afro-Caribbean individuals, 57,810 Hispanic or Latin American individuals, 6,384 East Asian ancestry individuals, 424,305 European ancestry individuals	NA	10q21.1	10	51531231		PRKG1			ENSG00000185532			rs61849823-T	rs61849823	0	61849823	intron_variant	0	0.8672	3e-14	13.5229		0.04297	[0.032-0.054] unit decrease	NR [44300000] (imputed)	N	body height	http://purl.obolibrary.org/obo/OBA_VT0001253	GCST90479635	Genome-wide genotyping array
	2025-01-06	39024449	Verma A	2024-07-19	Science	www.ncbi.nlm.nih.gov/pubmed/39024449	Diversity and scale: Genetic architecture of 2068 traits in the VA Million Veteran Program.	height (minimum, inv-normal transformed)	119,012 African American or Afro-Caribbean individuals, 57,810 Hispanic or Latin American individuals, 6,384 East Asian ancestry individuals, 424,306 European ancestry individuals	NA	10q21.1	10	51531231		PRKG1			ENSG00000185532			rs61849823-T	rs61849823	0	61849823	intron_variant	0	0.8672	9e-14	13.0458		0.04055	[0.03-0.051] unit decrease	NR [44300000] (imputed)	N	body height	http://purl.obolibrary.org/obo/OBA_VT0001253	GCST90479636	Genome-wide genotyping array
	2025-01-08	39715877	Akimova ET	2024-12-23	Nat Hum Behav	www.ncbi.nlm.nih.gov/pubmed/39715877	Polygenic prediction of occupational status GWAS elucidates genetic and environmental interplay in intergenerational transmission, careers and health in UK Biobank.	ISEI occupational score (MTAG)	271,769 British ancestry individuals	NA	10q21.1	10	51920347		PRKG1			ENSG00000185532			rs12245197-?	rs12245197	0	12245197	intron_variant	0	NR	4e-08	7.39794		0.0086181	[0.0055-0.0117] unit decrease	NR [NR] (imputed)	N	socioeconomic status	http://www.ebi.ac.uk/efo/EFO_0022866	GCST90492677	Genome-wide genotyping array
	2024-03-28	37500982	He D	2023-07-27	Osteoporos Int	www.ncbi.nlm.nih.gov/pubmed/37500982	A longitudinal genome-wide association study of bone mineral density mean and variability in the UK Biobank.	Bone mineral density mean	5,862 South Asian ancestry individuals	NA	10q21.1	10	51558357		PRKG1			ENSG00000185532			rs192370094-?	rs192370094	0	192370094	intron_variant	0	NR	1e-09	9				NR [NR] (imputed)	N	bone density	http://purl.obolibrary.org/obo/OBA_1000110	GCST90321120	Genome-wide genotyping array
Yes	2025-02-04	39749473	Crouch DJM	2025-01-01	Genet Epidemiol	www.ncbi.nlm.nih.gov/pubmed/39749473	Bayesian Effect Size Ranking to Prioritise Genetic Risk Variants in Common Diseases for Follow-Up Studies.	Type 1 diabetes	15,573 European ancestry cases, 158,408 European ancestry controls	NA	10q21.1	10	51860491		PRKG1			ENSG00000185532			rs12764113-G	rs12764113	0	12764113	intron_variant	0	0.1028	2e-06	5.69897		1.13	[1.08-1.19]	Affymetrix, Illumina [6294828] (imputed)	N	type 1 diabetes mellitus	http://purl.obolibrary.org/obo/MONDO_0005147	GCST90013791	Genome-wide genotyping array
	2024-04-25	38242899	Clifford RE	2024-01-19	Nat Commun	www.ncbi.nlm.nih.gov/pubmed/38242899	Genetic architecture distinguishes tinnitus from hearing loss.	Tinnitus	481,874 European ancestry individuals, 11,819 Hispanic cases, 20,869 Hispanic controls, 18,216 African ancestry cases, 64,127 African ancestry controls	NA	10q21.1	10	51253904		PRKG1			ENSG00000185532			rs16915908-T	rs16915908	0	16915908	intron_variant	0	0.9734	7e-09	8.1549		5.788	z score increase	Affymetrix [NR] (imputed)	N	Tinnitus	http://purl.obolibrary.org/obo/HP_0000360	GCST90428113	Genome-wide genotyping array
	2024-03-28	37500982	He D	2023-07-27	Osteoporos Int	www.ncbi.nlm.nih.gov/pubmed/37500982	A longitudinal genome-wide association study of bone mineral density mean and variability in the UK Biobank.	Bone mineral density mean	5,862 South Asian ancestry individuals	NA	10q11.23	10	51013026		PRKG1			ENSG00000185532			rs117386201-?	rs117386201	0	117386201	intron_variant	0	NR	2e-14	13.699				NR [NR] (imputed)	N	bone density	http://purl.obolibrary.org/obo/OBA_1000110	GCST90321120	Genome-wide genotyping array
	2024-03-28	37500982	He D	2023-07-27	Osteoporos Int	www.ncbi.nlm.nih.gov/pubmed/37500982	A longitudinal genome-wide association study of bone mineral density mean and variability in the UK Biobank.	Bone mineral density mean	5,862 South Asian ancestry individuals	NA	10q21.1	10	51583953		PRKG1			ENSG00000185532			rs141129075-?	rs141129075	0	141129075	intron_variant	0	NR	3e-10	9.52288				NR [NR] (imputed)	N	bone density	http://purl.obolibrary.org/obo/OBA_1000110	GCST90321120	Genome-wide genotyping array
	2024-04-30	38538606	Harris BHL	2024-03-27	Sci Rep	www.ncbi.nlm.nih.gov/pubmed/38538606	New role of fat-free mass in cancer risk linked with genetic predisposition.	Whole body fat free mass (UKB data field 23101)	337,739 European ancestry individuals	NA	10q21.1	10	51531231		PRKG1			ENSG00000185532			rs61849823-C	rs61849823	0	61849823	intron_variant	0	NR	3e-08	7.52288		0.00991857	[0.0064-0.0134] unit increase	Affymetrix [18893866] (imputed)	N	lean body mass	http://www.ebi.ac.uk/efo/EFO_0004995	GCST90428120	Genome-wide genotyping array
	2024-04-30	38538606	Harris BHL	2024-03-27	Sci Rep	www.ncbi.nlm.nih.gov/pubmed/38538606	New role of fat-free mass in cancer risk linked with genetic predisposition.	Whole body fat mass (UKB data field 23100)	337,196 European ancestry individuals	NA	10q21.1	10	51920325		PRKG1			ENSG00000185532			rs1937684-A	rs1937684	0	1937684	intron_variant	0	NR	3e-09	8.52288		0.0147237	[0.0098-0.0196] unit decrease	Affymetrix [18893691] (imputed)	N	fat pad mass	http://purl.obolibrary.org/obo/OBA_0004528	GCST90428121	Genome-wide genotyping array
	2024-05-16	38689001	Keaton JM	2024-04-30	Nat Genet	www.ncbi.nlm.nih.gov/pubmed/38689001	Genome-wide analysis in over 1 million individuals of European ancestry yields improved polygenic risk scores for blood pressure traits.	Systolic blood pressure	1,028,980 European ancestry individuals	40,204 African ancestry individuals, 21,843 African American individuals	10q21.1	10	51909130		PRKG1			ENSG00000185532			rs11000060-C	rs11000060	0	11000060	intron_variant	0	NR	3e-06	5.52288	(EA)	0.1448	[0.084-0.205] unit increase	NR [7568459] (imputed)	N	systolic blood pressure	http://www.ebi.ac.uk/efo/EFO_0006335	GCST90310294	Genome-wide genotyping array
	2024-05-16	38689001	Keaton JM	2024-04-30	Nat Genet	www.ncbi.nlm.nih.gov/pubmed/38689001	Genome-wide analysis in over 1 million individuals of European ancestry yields improved polygenic risk scores for blood pressure traits.	Systolic blood pressure	1,028,980 European ancestry individuals	40,204 African ancestry individuals, 21,843 African American individuals	10q21.1	10	51921036		PRKG1			ENSG00000185532			rs11000132-T	rs11000132	0	11000132	intron_variant	0	NR	4e-09	8.39794	(EA)	0.1931	[0.13-0.26] unit decrease	NR [7568459] (imputed)	N	systolic blood pressure	http://www.ebi.ac.uk/efo/EFO_0006335	GCST90310294	Genome-wide genotyping array
	2024-05-16	38689001	Keaton JM	2024-04-30	Nat Genet	www.ncbi.nlm.nih.gov/pubmed/38689001	Genome-wide analysis in over 1 million individuals of European ancestry yields improved polygenic risk scores for blood pressure traits.	Diastolic blood pressure	1,028,980 European ancestry individuals	62,047 African ancestry individuals, 21,843 African American individuals	10q21.1	10	51921036		PRKG1			ENSG00000185532			rs11000132-T	rs11000132	0	11000132	intron_variant	0	NR	3e-07	6.52288	(EA)	0.104	[0.064-0.144] unit decrease	NR [7582263] (imputed)	N	diastolic blood pressure	http://www.ebi.ac.uk/efo/EFO_0006336	GCST90310295	Genome-wide genotyping array
	2024-08-30	39134668	Shi S	2024-08-12	Nat Genet	www.ncbi.nlm.nih.gov/pubmed/39134668	A Genomics England haplotype reference panel and imputation of UK Biobank.	Body mass index	403,610 European ancestry individuals	NA	10q21.1	10	51913526		PRKG1			ENSG00000185532			rs4595495-?	rs4595495	0	4595495	intron_variant	0	NR	8e-10	9.09691		0.0129138	[0.0088-0.017] unit increase	Affymetrix [161917644] (imputed)	N	body mass index	http://www.ebi.ac.uk/efo/EFO_0004340	GCST90435413	Genome-wide genotyping array
	2022-09-28	34282934	Fan W	2021-07-20	mSystems	www.ncbi.nlm.nih.gov/pubmed/34282934	Association between Human Genetic Variants and the Vaginal Bacteriome of Pregnant Women.	Vaginal microbiome MetaCyc pathway (FUCCAT-PWY|fucose degradation)	315 Chinese ancestry individuals	NA	10q21.1	10	51332033		PRKG1			ENSG00000185532			rs148950863-G	rs148950863	0	148950863	intron_variant	0	NR	1e-06	6		0.9887	[0.59-1.38] unit increase	Illumina [492582]	N	vaginal microbiome measurement	http://www.ebi.ac.uk/efo/EFO_0011013	GCST90026732	Genome-wide genotyping array
	2022-09-28	34282934	Fan W	2021-07-20	mSystems	www.ncbi.nlm.nih.gov/pubmed/34282934	Association between Human Genetic Variants and the Vaginal Bacteriome of Pregnant Women.	Vaginal microbiome MetaCyc pathway (P221-PWY|octane oxidation)	315 Chinese ancestry individuals	NA	10q21.1	10	51332033		PRKG1			ENSG00000185532			rs148950863-G	rs148950863	0	148950863	intron_variant	0	NR	9e-08	7.04576		1.076	[0.69-1.46] unit increase	Illumina [492582]	N	vaginal microbiome measurement	http://www.ebi.ac.uk/efo/EFO_0011013	GCST90026768	Genome-wide genotyping array
	2022-09-28	34282934	Fan W	2021-07-20	mSystems	www.ncbi.nlm.nih.gov/pubmed/34282934	Association between Human Genetic Variants and the Vaginal Bacteriome of Pregnant Women.	Vaginal microbiome MetaCyc pathway (P562-PWY|myo-inositol degradation I)	315 Chinese ancestry individuals	NA	10q21.1	10	51332033		PRKG1			ENSG00000185532			rs148950863-G	rs148950863	0	148950863	intron_variant	0	NR	2e-06	5.69897		1.05	[0.63-1.47] unit increase	Illumina [492582]	N	vaginal microbiome measurement	http://www.ebi.ac.uk/efo/EFO_0011013	GCST90026774	Genome-wide genotyping array
	2023-05-16	36707530	Kim J	2023-01-27	Sci Rep	www.ncbi.nlm.nih.gov/pubmed/36707530	Investigation of genetic variants and causal biomarkers associated with brain aging.	Brain age (difference between predicted and chronological age)	34,129 British ancestry individuals	NA	10q21.1	10	51111389		PRKG1			ENSG00000185532			rs535001460-?	rs535001460	0	535001460	intron_variant	0	NR	6e-09	8.22185		1.552	[1.03-2.08] unit increase	NR [38000000] (imputed)	N	brain age measurement	http://www.ebi.ac.uk/efo/EFO_0010602	GCST90269833	Genome-wide genotyping array
	2022-07-01	35361970	Okbay A	2022-03-31	Nat Genet	www.ncbi.nlm.nih.gov/pubmed/35361970	Polygenic prediction of educational attainment within and between families from genome-wide association analyses in 3 million individuals.	Educational attainment	3,037,499 European ancestry individuals	NA	10q21.1	10	51140687		PRKG1			ENSG00000185532			rs10995839-A	rs10995839	0	10995839	intron_variant	0	0.8424	5e-09	8.30103		0.0084191	[0.0056-0.0112] unit decrease	Illumina [10675380] (imputed)	N	educational attainment	http://www.ebi.ac.uk/efo/EFO_0011015	GCST90105038	Genome-wide genotyping array
	2022-07-01	35361970	Okbay A	2022-03-31	Nat Genet	www.ncbi.nlm.nih.gov/pubmed/35361970	Polygenic prediction of educational attainment within and between families from genome-wide association analyses in 3 million individuals.	Educational attainment	3,037,499 European ancestry individuals	NA	10q21.1	10	51538015		PRKG1			ENSG00000185532			rs6480307-C	rs6480307	0	6480307	intron_variant	0	0.1398	4e-10	9.39794	(conditional)	0.00948846	[0.0065-0.0125] unit increase	Illumina [10675380] (imputed)	N	educational attainment	http://www.ebi.ac.uk/efo/EFO_0011015	GCST90105038	Genome-wide genotyping array
	2022-07-01	35361970	Okbay A	2022-03-31	Nat Genet	www.ncbi.nlm.nih.gov/pubmed/35361970	Polygenic prediction of educational attainment within and between families from genome-wide association analyses in 3 million individuals.	Educational attainment	3,037,499 European ancestry individuals	NA	10q21.1	10	51767345		PRKG1			ENSG00000185532			rs116193437-A	rs116193437	0	116193437	intron_variant	0	0.0258	2e-08	7.69897		0.0190304	[0.012-0.026] unit increase	Illumina [10675380] (imputed)	N	educational attainment	http://www.ebi.ac.uk/efo/EFO_0011015	GCST90105038	Genome-wide genotyping array
	2022-07-01	35361970	Okbay A	2022-03-31	Nat Genet	www.ncbi.nlm.nih.gov/pubmed/35361970	Polygenic prediction of educational attainment within and between families from genome-wide association analyses in 3 million individuals.	Educational attainment	3,037,499 European ancestry individuals	NA	10q21.1	10	51903555		PRKG1			ENSG00000185532			rs7097348-T	rs7097348	0	7097348	intron_variant	0	0.7168	6e-15	14.2218		0.00905386	[0.0068-0.0113] unit decrease	Illumina [10675380] (imputed)	N	educational attainment	http://www.ebi.ac.uk/efo/EFO_0011015	GCST90105038	Genome-wide genotyping array
	2022-07-01	35361970	Okbay A	2022-03-31	Nat Genet	www.ncbi.nlm.nih.gov/pubmed/35361970	Polygenic prediction of educational attainment within and between families from genome-wide association analyses in 3 million individuals.	Educational attainment	3,037,499 European ancestry individuals	NA	10q21.1	10	52002909		PRKG1			ENSG00000185532			rs2447643-A	rs2447643	0	2447643	intron_variant	0	0.5257	8e-10	9.09691		0.0064449	[0.0044-0.0085] unit increase	Illumina [10675380] (imputed)	N	educational attainment	http://www.ebi.ac.uk/efo/EFO_0011015	GCST90105038	Genome-wide genotyping array
	2025-01-06	39024449	Verma A	2024-07-19	Science	www.ncbi.nlm.nih.gov/pubmed/39024449	Diversity and scale: Genetic architecture of 2068 traits in the VA Million Veteran Program.	Other specified peripheral vascular disease (PheCode 443.8)	769 African American or Afro-Caribbean cases, 119,831 African American or Afro-Caribbean controls, 2,685 European ancestry cases, 444,110 European ancestry controls, 252 Hispanic or Latin American cases, 59,193 Hispanic or Latin American controls	NA	10q21.1	10	51691878		PRKG1			ENSG00000185532			rs149511772-A	rs149511772	0	149511772	intron_variant	0	0.9996	5e-12	11.301		3.345	[3.32-3.37] unit decrease	NR [44300000] (imputed)	N	peripheral vascular disease	http://www.ebi.ac.uk/efo/EFO_0003875	GCST90480208	Genome-wide genotyping array
	2023-02-09	36224396	Yengo L	2022-10-12	Nature	www.ncbi.nlm.nih.gov/pubmed/36224396	A saturated map of common genetic variants associated with human height.	Height	5,314,291 European ancestry, Hispanic or Latin American, East Asian ancestry, African ancestry, South Asian ancestry individuals	NA	10q11.23	10	51053973		PRKG1			ENSG00000185532			rs16913257-C	rs16913257	0	16913257	intron_variant	0	0.2368	2e-47	46.699		0.0106	[0.0092-0.012] unit increase	Affymetrix, Illumina [1385132] (imputed)	N	body height	http://purl.obolibrary.org/obo/OBA_VT0001253	GCST90245848	Genome-wide genotyping array
	2023-02-09	36224396	Yengo L	2022-10-12	Nature	www.ncbi.nlm.nih.gov/pubmed/36224396	A saturated map of common genetic variants associated with human height.	Height	5,314,291 European ancestry, Hispanic or Latin American, East Asian ancestry, African ancestry, South Asian ancestry individuals	NA	10q21.1	10	51156176		PRKG1			ENSG00000185532			rs1904692-A	rs1904692	0	1904692	intron_variant	0	0.4692	9e-23	22.0458		0.0062	[0.005-0.0074] unit decrease	Affymetrix, Illumina [1385132] (imputed)	N	body height	http://purl.obolibrary.org/obo/OBA_VT0001253	GCST90245848	Genome-wide genotyping array
	2023-02-09	36224396	Yengo L	2022-10-12	Nature	www.ncbi.nlm.nih.gov/pubmed/36224396	A saturated map of common genetic variants associated with human height.	Height	5,314,291 European ancestry, Hispanic or Latin American, East Asian ancestry, African ancestry, South Asian ancestry individuals	NA	10q21.1	10	51249710		PRKG1			ENSG00000185532			rs10996323-G	rs10996323	0	10996323	intron_variant	0	0.0693	8e-07	6.09691		0.006	[0.0036-0.0084] unit increase	Affymetrix, Illumina [1385132] (imputed)	N	body height	http://purl.obolibrary.org/obo/OBA_VT0001253	GCST90245848	Genome-wide genotyping array
	2023-02-09	36224396	Yengo L	2022-10-12	Nature	www.ncbi.nlm.nih.gov/pubmed/36224396	A saturated map of common genetic variants associated with human height.	Height	5,314,291 European ancestry, Hispanic or Latin American, East Asian ancestry, African ancestry, South Asian ancestry individuals	NA	10q21.1	10	51275532		PRKG1			ENSG00000185532			rs4086289-A	rs4086289	0	4086289	intron_variant	0	0.3629	3e-09	8.52288		0.0038	[0.0026-0.005] unit decrease	Affymetrix, Illumina [1385132] (imputed)	N	body height	http://purl.obolibrary.org/obo/OBA_VT0001253	GCST90245848	Genome-wide genotyping array
	2023-02-09	36224396	Yengo L	2022-10-12	Nature	www.ncbi.nlm.nih.gov/pubmed/36224396	A saturated map of common genetic variants associated with human height.	Height	5,314,291 European ancestry, Hispanic or Latin American, East Asian ancestry, African ancestry, South Asian ancestry individuals	NA	10q21.1	10	51366706		PRKG1			ENSG00000185532			rs1189316-G	rs1189316	0	1189316	intron_variant	0	0.0944	2e-11	10.699		0.0072	[0.005-0.0094] unit decrease	Affymetrix, Illumina [1385132] (imputed)	N	body height	http://purl.obolibrary.org/obo/OBA_VT0001253	GCST90245848	Genome-wide genotyping array
	2023-02-09	36224396	Yengo L	2022-10-12	Nature	www.ncbi.nlm.nih.gov/pubmed/36224396	A saturated map of common genetic variants associated with human height.	Height	5,314,291 European ancestry, Hispanic or Latin American, East Asian ancestry, African ancestry, South Asian ancestry individuals	NA	10q21.1	10	51429317		PRKG1			ENSG00000185532			rs10997502-G	rs10997502	0	10997502	intron_variant	0	0.2471	6e-30	29.2218		0.0082	[0.0068-0.0096] unit increase	Affymetrix, Illumina [1385132] (imputed)	N	body height	http://purl.obolibrary.org/obo/OBA_VT0001253	GCST90245848	Genome-wide genotyping array
	2023-02-09	36224396	Yengo L	2022-10-12	Nature	www.ncbi.nlm.nih.gov/pubmed/36224396	A saturated map of common genetic variants associated with human height.	Height	5,314,291 European ancestry, Hispanic or Latin American, East Asian ancestry, African ancestry, South Asian ancestry individuals	NA	10q21.1	10	51529668		PRKG1			ENSG00000185532			rs9988728-A	rs9988728	0	9988728	intron_variant	0	0.2573	1e-96	96		0.0149	[0.014-0.016] unit increase	Affymetrix, Illumina [1385132] (imputed)	N	body height	http://purl.obolibrary.org/obo/OBA_VT0001253	GCST90245848	Genome-wide genotyping array
	2023-02-09	36224396	Yengo L	2022-10-12	Nature	www.ncbi.nlm.nih.gov/pubmed/36224396	A saturated map of common genetic variants associated with human height.	Height	5,314,291 European ancestry, Hispanic or Latin American, East Asian ancestry, African ancestry, South Asian ancestry individuals	NA	10q21.1	10	52011325		PRKG1			ENSG00000185532			rs726195-G	rs726195	0	726195	intron_variant	0	0.2399	2e-31	30.699		0.0084	[0.007-0.0098] unit increase	Affymetrix, Illumina [1385132] (imputed)	N	body height	http://purl.obolibrary.org/obo/OBA_VT0001253	GCST90245848	Genome-wide genotyping array
	2023-02-09	36224396	Yengo L	2022-10-12	Nature	www.ncbi.nlm.nih.gov/pubmed/36224396	A saturated map of common genetic variants associated with human height.	Height	5,314,291 European ancestry, Hispanic or Latin American, East Asian ancestry, African ancestry, South Asian ancestry individuals	NA	10q21.1	10	52061478		PRKG1			ENSG00000185532			rs4411238-T	rs4411238	0	4411238	intron_variant	0	0.657	8e-32	31.0969		0.008	[0.0066-0.0094] unit increase	Affymetrix, Illumina [1385132] (imputed)	N	body height	http://purl.obolibrary.org/obo/OBA_VT0001253	GCST90245848	Genome-wide genotyping array
	2023-02-09	36224396	Yengo L	2022-10-12	Nature	www.ncbi.nlm.nih.gov/pubmed/36224396	A saturated map of common genetic variants associated with human height.	Height	5,314,291 European ancestry, Hispanic or Latin American, East Asian ancestry, African ancestry, South Asian ancestry individuals	NA	10q21.1	10	52066922		PRKG1			ENSG00000185532			rs10824010-C	rs10824010	0	10824010	intron_variant	0	0.3628	1e-11	11		0.0045	[0.0031-0.0059] unit decrease	Affymetrix, Illumina [1385132] (imputed)	N	body height	http://purl.obolibrary.org/obo/OBA_VT0001253	GCST90245848	Genome-wide genotyping array
	2025-01-06	39024449	Verma A	2024-07-19	Science	www.ncbi.nlm.nih.gov/pubmed/39024449	Diversity and scale: Genetic architecture of 2068 traits in the VA Million Veteran Program.	Cancer of larynx (PheCode 149.4)	546 African American or Afro-Caribbean cases, 121,214 African American or Afro-Caribbean controls, 2,291 European ancestry cases, 448,301 European ancestry controls	NA	10q21.1	10	51703813		PRKG1			ENSG00000185532			rs148595717-G	rs148595717	0	148595717	intron_variant	0	0.9969	2e-11	10.699		1.408	[1.33-1.49] unit decrease	NR [44300000] (imputed)	N	laryngeal carcinoma	http://purl.obolibrary.org/obo/MONDO_0002358	GCST90479778	Genome-wide genotyping array
	2025-02-14	38326779	Boahen CK	2024-02-08	BMC Genomics	www.ncbi.nlm.nih.gov/pubmed/38326779	Sex-biased genetic regulation of inflammatory proteins in the Dutch population.	TRANCE levels	318 European ancestry males	NA	10q21.1	10	51919440		PRKG1			ENSG00000185532			rs2186146-?	rs2186146	0	2186146	intron_variant	0	NR	8e-06	5.09691		4.464	z score decrease	Illumina [4296841] (imputed)	N	TNF-related activation-induced cytokine measurement	http://www.ebi.ac.uk/efo/EFO_0010929	GCST90503399	Genome-wide genotyping array
	2025-01-06	39024449	Verma A	2024-07-19	Science	www.ncbi.nlm.nih.gov/pubmed/39024449	Diversity and scale: Genetic architecture of 2068 traits in the VA Million Veteran Program.	Melanomas of skin, dx or hx (PheCode 172.1)	256 African American or Afro-Caribbean cases, 121,283 African American or Afro-Caribbean controls, 45,274 European ancestry cases, 389,597 European ancestry controls, 1,032 Hispanic or Latin American cases, 58,328 Hispanic or Latin American controls	NA	10q21.1	10	51593435		PRKG1			ENSG00000185532			rs139761953-T	rs139761953	0	139761953	intron_variant	0	0.9988	1e-12	12		2.608	[2.57-2.65] unit decrease	NR [44300000] (imputed)	N	cutaneous melanoma	http://www.ebi.ac.uk/efo/EFO_0000389	GCST90479794	Genome-wide genotyping array
	2025-01-06	39024449	Verma A	2024-07-19	Science	www.ncbi.nlm.nih.gov/pubmed/39024449	Diversity and scale: Genetic architecture of 2068 traits in the VA Million Veteran Program.	What is your height? (cm, inv-normal transformed)	283,251 European ancestry individuals	NA	10q21.1	10	51531231		PRKG1			ENSG00000185532			rs61849823-T	rs61849823	0	61849823	intron_variant	0	0.8443	6e-20	19.2218		0.04123	[0.032-0.05] unit decrease	NR [44300000] (imputed)	N	body height	http://purl.obolibrary.org/obo/OBA_VT0001253	GCST90475368	Genome-wide genotyping array
	2019-10-16	31562340	Akiyama M	2019-09-27	Nat Commun	www.ncbi.nlm.nih.gov/pubmed/31562340	Characterizing rare and low-frequency height-associated variants in the Japanese population.	Height	159,095 Japanese ancestry individuals	32,692 Japanese ancestry individuals	10q11.23	10	51020675	PRKG1	PRKG1			ENSG00000185532			rs76442815-?	rs76442815	0	76442815	intron_variant	0	NR	1e-09	9		0.0287606	[0.019-0.038] unit increase	Illumina [27896057] (imputed)	N	body height	http://purl.obolibrary.org/obo/OBA_VT0001253	GCST008839	Genome-wide genotyping array
	2023-02-09	36224396	Yengo L	2022-10-12	Nature	www.ncbi.nlm.nih.gov/pubmed/36224396	A saturated map of common genetic variants associated with human height.	Height	5,314,291 European ancestry, Hispanic or Latin American, East Asian ancestry, African ancestry, South Asian ancestry individuals	NA	10q11.23	10	51029595		PRKG1			ENSG00000185532			rs6479874-T	rs6479874	0	6479874	intron_variant	0	0.1266	3e-12	11.5229	(conditional)	0.0078	[0.0056-0.01] unit increase	Affymetrix, Illumina [1385132] (imputed)	N	body height	http://purl.obolibrary.org/obo/OBA_VT0001253	GCST90245848	Genome-wide genotyping array
	2023-02-09	36224396	Yengo L	2022-10-12	Nature	www.ncbi.nlm.nih.gov/pubmed/36224396	A saturated map of common genetic variants associated with human height.	Height	5,314,291 European ancestry, Hispanic or Latin American, East Asian ancestry, African ancestry, South Asian ancestry individuals	NA	10q11.23	10	51089969		PRKG1			ENSG00000185532			rs2879548-A	rs2879548	0	2879548	intron_variant	0	0.0297	5e-26	25.301	(conditional)	0.0201	[0.016-0.024] unit increase	Affymetrix, Illumina [1385132] (imputed)	N	body height	http://purl.obolibrary.org/obo/OBA_VT0001253	GCST90245848	Genome-wide genotyping array
	2023-02-09	36224396	Yengo L	2022-10-12	Nature	www.ncbi.nlm.nih.gov/pubmed/36224396	A saturated map of common genetic variants associated with human height.	Height	5,314,291 European ancestry, Hispanic or Latin American, East Asian ancestry, African ancestry, South Asian ancestry individuals	NA	10q21.1	10	51560953		PRKG1			ENSG00000185532			rs10998122-A	rs10998122	0	10998122	intron_variant	0	0.1341	2e-30	29.699	(conditional)	0.0123	[0.01-0.014] unit decrease	Affymetrix, Illumina [1385132] (imputed)	N	body height	http://purl.obolibrary.org/obo/OBA_VT0001253	GCST90245848	Genome-wide genotyping array
	2021-12-14	34594039	Sakaue S	2021-09-30	Nat Genet	www.ncbi.nlm.nih.gov/pubmed/34594039	A cross-population atlas of genetic associations for 220 human phenotypes.	Height	360,388 European ancestry individuals, 165,056 East Asian ancestry individuals	NA	10q11.23	10	51006278		PRKG1			ENSG00000185532			rs2339686-A	rs2339686	0	2339686	intron_variant	0	NR	3e-21	20.5229		0.0155	[0.012-0.019] unit decrease	Affymetrix, Illumina [20538915] (imputed)	N	body height	http://purl.obolibrary.org/obo/OBA_VT0001253	GCST90018959	Genome-wide genotyping array
	2021-12-14	34594039	Sakaue S	2021-09-30	Nat Genet	www.ncbi.nlm.nih.gov/pubmed/34594039	A cross-population atlas of genetic associations for 220 human phenotypes.	Height	165,056 East Asian ancestry individuals	NA	10q11.23	10	51020675		PRKG1			ENSG00000185532			rs76442815-C	rs76442815	0	76442815	intron_variant	0	0.125079	2e-08	7.69897		0.0189462	[0.012-0.026] unit increase	Illumina [13479295] (imputed)	N	body height	http://purl.obolibrary.org/obo/OBA_VT0001253	GCST90018739	Genome-wide genotyping array
	2021-12-14	34594039	Sakaue S	2021-09-30	Nat Genet	www.ncbi.nlm.nih.gov/pubmed/34594039	A cross-population atlas of genetic associations for 220 human phenotypes.	Calcium levels	315,153 European ancestry individuals, 83,980 East Asian ancestry individuals	NA	10q11.23	10	51065672		PRKG1			ENSG00000185532			rs10740127-A	rs10740127	0	10740127	intron_variant	0	NR	2e-10	9.69897		0.0194	[0.014-0.025] unit decrease	Affymetrix, Illumina [20528270] (imputed)	N	calcium measurement	http://www.ebi.ac.uk/efo/EFO_0004838	GCST90018951	Genome-wide genotyping array
	2021-12-14	34594039	Sakaue S	2021-09-30	Nat Genet	www.ncbi.nlm.nih.gov/pubmed/34594039	A cross-population atlas of genetic associations for 220 human phenotypes.	Body mass index	359,983 European ancestry individuals, 163,835 East Asian ancestry individuals	NA	10q21.1	10	51913526		PRKG1			ENSG00000185532			rs4595495-G	rs4595495	0	4595495	intron_variant	0	NR	8e-09	8.09691		0.013	[0.0087-0.0173] unit increase	Affymetrix, Illumina [20538802] (imputed)	N	body mass index	http://www.ebi.ac.uk/efo/EFO_0004340	GCST90018947	Genome-wide genotyping array
Yes	2016-07-23	26198764	Goes FS	2015-07-21	Am J Med Genet B Neuropsychiatr Genet	www.ncbi.nlm.nih.gov/pubmed/26198764	Genome-wide association study of schizophrenia in Ashkenazi Jews.	Schizophrenia	592 Ashkenazi Jewish ancestry cases, 505 Ashkenazi Jewish ancestry controls, 36,989 cases, 113,075 controls	NA	10q21.1	10	52184682	NR	PRKG1, PRKG1-AS1			ENSG00000185532, ENSG00000236671			rs61847307-C	rs61847307	0	61847307	intron_variant	0	NR	4e-07	6.39794		1.06383	[NR]	Illumina [7158791] (imputed)	N	schizophrenia	http://purl.obolibrary.org/obo/MONDO_0005090	GCST003048	Genome-wide genotyping array
	2019-02-08	30595370	Kichaev G	2018-12-27	Am J Hum Genet	www.ncbi.nlm.nih.gov/pubmed/30595370	Leveraging Polygenic Functional Enrichment to Improve GWAS Power.	Heel bone mineral density	approximately 446,000 European ancestry individuals	NA	10q21.1	10	52206364		PRKG1-AS1, PRKG1			ENSG00000236671, ENSG00000185532			rs1194491-?	rs1194491	0	1194491	intron_variant	0	NR	3e-13	12.5229				NR [~ 8900000] (imputed)	N	heel bone mineral density	http://www.ebi.ac.uk/efo/EFO_0009270	GCST007066	Genome-wide genotyping array
Yes	2019-12-23	31740837	Lam M	2019-11-18	Nat Genet	www.ncbi.nlm.nih.gov/pubmed/31740837	Comparative genetic architectures of schizophrenia in East Asian and European populations.	Schizophrenia	22,778 East Asian ancestry cases, 35,362 East Asian ancestry controls, 33,640 European ancestry cases, 43,456 European ancestry controls	NA	10q21.1	10	52180766	NR	PRKG1, PRKG1-AS1			ENSG00000185532, ENSG00000236671			rs61847303-?	rs61847303	0	61847303	intron_variant	0	NR	2e-08	7.69897		1.063	[1.04-1.08]	Affymetrix, Illumina [12447948] (imputed)	N	schizophrenia	http://purl.obolibrary.org/obo/MONDO_0005090	GCST009337	Genome-wide genotyping array
	2017-06-23	28265120	Polimanti R	2017-03-07	Mol Psychiatry	www.ncbi.nlm.nih.gov/pubmed/28265120	A genome-wide gene-by-trauma interaction study of alcohol misuse in two independent cohorts identifies PRKG1 as a risk locus.	Alcohol misuse (trauma interaction)	1,748 African American trauma-exposed individuals, 643 African American trauma-unexposed individuals, 10,732 European ancestry trauma-exposed and unexposed individuals, 3,238 Hispanic trauma-exposed and unexposed individuals	2,738 African American trauma-exposed individuals, 1,591 African American trauma-unexposed individuals, 3,755 European ancestry trauma-exposed and unexposed individuals	10q21.1	10	52223498	PRKG1	PRKG1-AS1, PRKG1			ENSG00000236671, ENSG00000185532			rs1729578-C	rs1729578	0	1729578	intron_variant	0	0.23	2e-08	7.69897	(AA)	5.64	z score increase	Illumina [NR] (imputed)	N	stressful life event measurement, alcohol dependence measurement	http://www.ebi.ac.uk/efo/EFO_0007781, http://www.ebi.ac.uk/efo/EFO_0007835	GCST004225	Genome-wide genotyping array
Yes	2021-09-24	34506852	Chang X	2021-09-07	J Allergy Clin Immunol	www.ncbi.nlm.nih.gov/pubmed/34506852	A genome-wide association meta-analysis identifies new Eosinophilic esophagitis loci.	Eosinophilic esophagitis	1,930 European ancestry cases, 13,634 European ancestry controls	NA	10q21.1	10	52207157	PRKG1	PRKG1, PRKG1-AS1			ENSG00000185532, ENSG00000236671			rs185811602-T	rs185811602	0	185811602	intron_variant	0	0.0011	1e-08	8		6.37	[3.38-11.97]	Illumina [11310926] (imputed)	N	eosinophilic esophagitis	http://www.ebi.ac.uk/efo/EFO_0004232	GCST90027899	Genome-wide genotyping array
Yes	2019-02-21	30285260	Ikeda M	2018-10-03	Schizophr Bull	www.ncbi.nlm.nih.gov/pubmed/30285260	Genome-Wide Association Study Detected Novel Susceptibility Genes for Schizophrenia and Shared Trans-Populations/Diseases Genetic Effect.	Schizophrenia	14,023 East Asian ancestry cases, 33,640 European ancestry cases, 31,505 East Asian ancestry controls, 43,456 European ancestry controls	NA	10q21.1	10	52184682	PRKG1	PRKG1, PRKG1-AS1			ENSG00000185532, ENSG00000236671			rs61847307-C	rs61847307	0	61847307	intron_variant	0	NR	1e-06	6	(EA)	1.06168	[1.04-1.09]	Illumina [6627481] (imputed)	N	schizophrenia	http://purl.obolibrary.org/obo/MONDO_0005090	GCST007201	Genome-wide genotyping array
Yes	2019-02-21	30285260	Ikeda M	2018-10-03	Schizophr Bull	www.ncbi.nlm.nih.gov/pubmed/30285260	Genome-Wide Association Study Detected Novel Susceptibility Genes for Schizophrenia and Shared Trans-Populations/Diseases Genetic Effect.	Schizophrenia	14,023 East Asian ancestry cases, 33,640 European ancestry cases, 31,505 East Asian ancestry controls, 43,456 European ancestry controls	NA	10q21.1	10	52184682	PRKG1	PRKG1, PRKG1-AS1			ENSG00000185532, ENSG00000236671			rs61847307-C	rs61847307	0	61847307	intron_variant	0	NR	5e-07	6.30103		1.06045	[1.04-1.08]	Illumina [6627481] (imputed)	N	schizophrenia	http://purl.obolibrary.org/obo/MONDO_0005090	GCST007201	Genome-wide genotyping array
Yes	2017-08-16	28540026	Anney RJL	2017-05-22	Mol Autism	www.ncbi.nlm.nih.gov/pubmed/28540026	Meta-analysis of GWAS of over 16,000 individuals with autism spectrum disorder highlights a novel locus at 10q24.32 and a significant overlap with schizophrenia.	Autism spectrum disorder or schizophrenia	schizophrenia cases and controls (see Ripke, 2014), up to 6,197 European ancestry ASD cases, up to 7,377 European ancestry controls, up to 1,190 ASD cases, up to 1,190 controls	NA	10q21.1	10	52184682	PRKG1	PRKG1, PRKG1-AS1			ENSG00000185532, ENSG00000236671			rs61847307-?	rs61847307	0	61847307	intron_variant	0	NR	3e-08	7.52288		1.06383	[1.04-1.09]	Affymetrix, Illumina [NR]	N	autism spectrum disorder, schizophrenia	http://www.ebi.ac.uk/efo/EFO_0003756, http://purl.obolibrary.org/obo/MONDO_0005090	GCST004521	Genome-wide genotyping array
Yes	2017-11-10	28991256	Li Z	2017-10-09	Nat Genet	www.ncbi.nlm.nih.gov/pubmed/28991256	Genome-wide association analysis identifies 30 new susceptibility loci for schizophrenia.	Schizophrenia	7,699 Chinese ancestry cases, 35,476 European ancestry cases, 18,327 Chinese ancestry controls, 46,839 European ancestry controls	4,384 Chinese ancestry cases, 5,770 Chinese ancestry controls	10q21.1	10	52184682	intergenic	PRKG1, PRKG1-AS1			ENSG00000185532, ENSG00000236671			rs61847307-C	rs61847307	0	61847307	intron_variant	0	NR	4e-07	6.39794		1.06045	[1.04-1.08]	Affymetrix, Illumina [up to 5107227] (imputed)	N	schizophrenia	http://purl.obolibrary.org/obo/MONDO_0005090	GCST004946	Genome-wide genotyping array
	2022-12-13	34620218	Meeks KAC	2021-10-07	Genome Med	www.ncbi.nlm.nih.gov/pubmed/34620218	Genome-wide analyses of multiple obesity-related cytokines and hormones informs biology of cardiometabolic traits.	Insulin levels in lean individuals	974 Sub-Saharan African ancestry individuals	1,563 African American individuals	10q21.1	10	52190941		PRKG1, PRKG1-AS1			ENSG00000185532, ENSG00000236671			rs142108645-T	rs142108645	0	142108645	intron_variant	0	NR	2e-08	7.69897	(Sub-Saharan African)	0.894	[0.58-1.2] unit decrease	Affymetrix, Illumina [NR] (imputed)	N	insulin measurement	http://www.ebi.ac.uk/efo/EFO_0004467	GCST90091171	Genome-wide genotyping array
	2022-09-01	31882771	Al-Khelaifi F	2019-12-27	Sci Rep	www.ncbi.nlm.nih.gov/pubmed/31882771	Metabolic GWAS of elite athletes reveals novel genetically-influenced metabolites associated with athletic performance.	Oleoyl-oleoyl-glycerol (18:1/18:1) [2] levels in elite athletes	490 individuals	NA	10q21.1	10	52169628		PRKG1, PRKG1-AS1			ENSG00000185532, ENSG00000236671			rs61847297-?	rs61847297	0	61847297	intron_variant	0	NR	5e-06	5.30103		1.12061	[0.64-1.6] unit increase	Illumina [275016]	N	lipid measurement	http://www.ebi.ac.uk/efo/EFO_0004529	GCST90134036	Genome-wide genotyping array
	2023-10-12	37688361	Tavares LC	2023-09-08	United European Gastroenterol J	www.ncbi.nlm.nih.gov/pubmed/37688361	A pilot genome-wide association study meta-analysis of gastroparesis.	Gastroparesis	880 European ancestry cases, 58,271 European ancestry controls	NA	10q21.1	10	52220867		PRKG1, PRKG1-AS1			ENSG00000185532, ENSG00000236671			rs58826461-T	rs58826461	0	58826461	intron_variant	0	0.1	7e-06	5.1549		0.6	[0.5-0.8]	Illumina [5811784] (imputed)	N	gastroparesis	http://www.ebi.ac.uk/efo/EFO_1000948	GCST90295922	Genome-wide genotyping array
	2023-02-09	36224396	Yengo L	2022-10-12	Nature	www.ncbi.nlm.nih.gov/pubmed/36224396	A saturated map of common genetic variants associated with human height.	Height	5,314,291 European ancestry, Hispanic or Latin American, East Asian ancestry, African ancestry, South Asian ancestry individuals	NA	10q21.1	10	52199695		PRKG1, PRKG1-AS1			ENSG00000185532, ENSG00000236671			rs2174257-A	rs2174257	0	2174257	intron_variant	0	0.5588	5e-15	14.301		0.0049	[0.0037-0.0061] unit increase	Affymetrix, Illumina [1385132] (imputed)	N	body height	http://purl.obolibrary.org/obo/OBA_VT0001253	GCST90245848	Genome-wide genotyping array
	2023-02-09	36224396	Yengo L	2022-10-12	Nature	www.ncbi.nlm.nih.gov/pubmed/36224396	A saturated map of common genetic variants associated with human height.	Height	5,314,291 European ancestry, Hispanic or Latin American, East Asian ancestry, African ancestry, South Asian ancestry individuals	NA	10q21.1	10	52277449		PRKG1-AS1, PRKG1			ENSG00000236671, ENSG00000185532			rs1919461-G	rs1919461	0	1919461	intron_variant	0	0.5657	7e-13	12.1549		0.0045	[0.0033-0.0057] unit increase	Affymetrix, Illumina [1385132] (imputed)	N	body height	http://purl.obolibrary.org/obo/OBA_VT0001253	GCST90245848	Genome-wide genotyping array
	2019-02-08	30595370	Kichaev G	2018-12-27	Am J Hum Genet	www.ncbi.nlm.nih.gov/pubmed/30595370	Leveraging Polygenic Functional Enrichment to Improve GWAS Power.	Heel bone mineral density	approximately 446,000 European ancestry individuals	NA	10q21.1	10	52309643		PRKG1-AS1			ENSG00000236671			rs7906360-?	rs7906360	0	7906360	intergenic_variant	0	NR	3e-16	15.5229				NR [~ 8900000] (imputed)	N	heel bone mineral density	http://www.ebi.ac.uk/efo/EFO_0009270	GCST007066	Genome-wide genotyping array
	2019-05-21	30595370	Kichaev G	2018-12-27	Am J Hum Genet	www.ncbi.nlm.nih.gov/pubmed/30595370	Leveraging Polygenic Functional Enrichment to Improve GWAS Power.	Height	approximately 458,000 European ancestry individuals	NA	10q11.23	10	50980049		MIX23P2 - PRKG1	ENSG00000236944	ENSG00000185532		16691	10839	rs10995225-?	rs10995225	0	10995225	intergenic_variant	1	NR	2e-25	24.699				NR [~ 8900000] (imputed)	N	body height	http://purl.obolibrary.org/obo/OBA_VT0001253	GCST007841	Genome-wide genotyping array
	2015-06-12	25342443	Lindstrom S	2014-10-24	Nat Commun	www.ncbi.nlm.nih.gov/pubmed/25342443	Genome-wide association study identifies multiple loci associated with both mammographic density and breast cancer risk.	Mammographic density (non-dense area)	7,600 European ancestry individuals	343 European ancestry individuals, 1,472 Old Order Amish individuals, 8,564 individuals	10q21.1	10	51695802	PRKG1, CSTF2T	PRKG1, CSTF2T			ENSG00000185532, ENSG00000177613			rs14168-A	rs14168	0	14168	3_prime_UTR_variant	0	0.94	3e-06	5.52288				Affymetrix, Illumina [~ 2500000] (imputed)	N	non-dense area measurement, mammographic density measurement	http://www.ebi.ac.uk/efo/EFO_0006504, http://www.ebi.ac.uk/efo/EFO_0005941	GCST002668	Genome-wide genotyping array
	2021-12-15	34560273	Shadrin AA	2021-09-21	Neuroimage	www.ncbi.nlm.nih.gov/pubmed/34560273	Vertex-wise multivariate genome-wide association study identifies 780 unique genetic loci associated with cortical morphology.	Cortical surface area	35,657 White British ancestry individuals	NA	10q11.23	10	50974953	NR	MIX23P2 - PRKG1	ENSG00000236944	ENSG00000185532		11595	15935	rs10822023-A	rs10822023	0	10822023	intergenic_variant	1	0.3424	8e-09	8.09691				NR [9056863] (imputed)	N	cerebral cortex area attribute	http://purl.obolibrary.org/obo/OBA_2045267	GCST90091060	Genome-wide genotyping array
	2023-05-11	37106081	Schoeler T	2023-04-27	Nat Hum Behav	www.ncbi.nlm.nih.gov/pubmed/37106081	Participation bias in the UK Biobank distorts genetic associations and downstream analyses.	Height (standard GWA)	283,749 European ancestry individuals	NA	10q11.23	10	50974681		MIX23P2 - PRKG1	ENSG00000236944	ENSG00000185532		11323	16207	rs10995206-A	rs10995206	0	10995206	intergenic_variant	1	NR	1e-10	10		0.11727	[0.082-0.153] unit increase	NR [7296935] (imputed)	N	body height	http://purl.obolibrary.org/obo/OBA_VT0001253	GCST90267284	Genome-wide genotyping array
	2023-05-11	37106081	Schoeler T	2023-04-27	Nat Hum Behav	www.ncbi.nlm.nih.gov/pubmed/37106081	Participation bias in the UK Biobank distorts genetic associations and downstream analyses.	Height (weighted GWA)	102,215 European ancestry individuals	NA	10q11.23	10	50974681		MIX23P2 - PRKG1	ENSG00000236944	ENSG00000185532		11323	16207	rs10995206-A	rs10995206	0	10995206	intergenic_variant	1	NR	7e-10	9.1549		0.19732	[0.13-0.26] unit increase	NR [7296935] (imputed)	N	body height	http://purl.obolibrary.org/obo/OBA_VT0001253	GCST90267285	Genome-wide genotyping array
	2022-12-21	35694926	Harper JD	2022-06-09	J Alzheimers Dis	www.ncbi.nlm.nih.gov/pubmed/35694926	Genome-Wide Association Study of Incident Dementia in a Community-Based Sample of Older Subjects.	Alzheimer's disease in non-APOE e4 carriers	232 European ancestry cases, 1,739 European ancestry controls	NA	10q11.23	10	50970067		MIX23P2 - PRKG1	ENSG00000236944	ENSG00000185532		6709	20821	rs150783484-?	rs150783484	0	150783484	intergenic_variant	1	NR	2e-06	5.69897		3.494	[2.087-5.852]	Illumina [14072053] (imputed)	N	Alzheimer disease, APOE carrier status	http://purl.obolibrary.org/obo/MONDO_0004975, http://www.ebi.ac.uk/efo/EFO_0007659	GCST90244033	Genome-wide genotyping array
	2022-12-21	35694926	Harper JD	2022-06-09	J Alzheimers Dis	www.ncbi.nlm.nih.gov/pubmed/35694926	Genome-Wide Association Study of Incident Dementia in a Community-Based Sample of Older Subjects.	Dementia in non-APOE e4 carriers	261 European ancestry cases, 1,739 European ancestry controls	NA	10q11.23	10	50970067		MIX23P2 - PRKG1	ENSG00000236944	ENSG00000185532		6709	20821	rs150783484-?	rs150783484	0	150783484	intergenic_variant	1	NR	2e-06	5.69897		3.377	[2.052-5.556]	Illumina [14072053] (imputed)	N	APOE carrier status, dementia	http://www.ebi.ac.uk/efo/EFO_0007659, http://purl.obolibrary.org/obo/MONDO_0001627	GCST90244035	Genome-wide genotyping array
	2022-08-04	35710981	Liu H	2022-06-16	Nat Genet	www.ncbi.nlm.nih.gov/pubmed/35710981	Epigenomic and transcriptomic analyses define core cell types, genes and targetable mechanisms for kidney disease.	Estimated glomerular filtration rate (creatinine)	1,205,871 European ancestry individuals, 168,300 East Asian ancestry individuals, 63,553 African ancestry individuals, 23,509 Hispanic or Latin American individuals, 22,103 African American individuals, 21,791 Central Asian or South Asian ancestry individuals, 1,502 Middle Eastern ancestry individuals, 939 other admixed ancestry individuals, 602 Native American ancestry individuals, 150 Asian anc…	NA	10q11.23	10	50974681		MIX23P2 - PRKG1	ENSG00000236944	ENSG00000185532		11323	16207	rs10995206-A	rs10995206	0	10995206	intergenic_variant	1	0.3377	1e-08	8		5.686	z score decrease	Affymetrix, Illumina [12653804] (imputed)	N	glomerular filtration rate	http://purl.obolibrary.org/obo/OBA_0003747	GCST90100220	Genome-wide genotyping array
	2022-09-01	31882771	Al-Khelaifi F	2019-12-27	Sci Rep	www.ncbi.nlm.nih.gov/pubmed/31882771	Metabolic GWAS of elite athletes reveals novel genetically-influenced metabolites associated with athletic performance.	2-pyrrolidinone levels in elite athletes	490 individuals	NA	10q21.1	10	52300341		PRKG1-AS1			ENSG00000236671			rs11815205-?	rs11815205	0	11815205	intergenic_variant	0	NR	7e-06	5.1549		0.411326	[0.23-0.59] unit increase	Illumina [275016]	N	amino acid measurement	http://www.ebi.ac.uk/efo/EFO_0005134	GCST90133524	Genome-wide genotyping array
	2022-03-07	34910505	van der Meer D	2021-12-15	Sci Adv	www.ncbi.nlm.nih.gov/pubmed/34910505	The genetic architecture of human cortical folding.	Vertex-wise cortical surface area	33,748 European ancestry individuals	NA	10q11.23	10	50974681		MIX23P2 - PRKG1	ENSG00000236944	ENSG00000185532		11323	16207	rs10995206-A	rs10995206	0	10995206	intergenic_variant	1	0.32	3e-08	7.52288		5.55	z score increase	Affymetrix [9061022] (imputed)	N	cerebral cortex area attribute	http://purl.obolibrary.org/obo/OBA_2045267	GCST90095130	Genome-wide genotyping array
	2023-12-12	36914875	Shrine N	2023-03-13	Nat Genet	www.ncbi.nlm.nih.gov/pubmed/36914875	Multi-ancestry genome-wide association analyses improve resolution of genes and pathways influencing lung function and chronic obstructive pulmonary disease risk.	Lung function (FEV1)	475,645 European ancestry individuals, 8,590 African ancestry individuals, 85,279 East Asian ancestry individuals, 4,270 South Asian ancestry individuals, 14,668 Hispanic or Latin American individuals	NA	10q11.23	10	50978258		MIX23P2 - PRKG1	ENSG00000236944	ENSG00000185532		14900	12630	rs2456758-A	rs2456758	0	2456758	intergenic_variant	1	0.115	2e-10	9.69897		6.383	z score decrease	Affymetrix, Illumina [63380712] (imputed)	N	forced expiratory volume	http://www.ebi.ac.uk/efo/EFO_0004314	GCST90244092	Genome-wide genotyping array
	2022-09-27	35396580	Trubetskoy V	2022-04-08	Nature	www.ncbi.nlm.nih.gov/pubmed/35396580	Mapping genomic loci implicates genes and synaptic biology in schizophrenia.	Schizophrenia	53,386 European ancestry cases, 77,258 European ancestry controls, 14,004 East Asian ancestry cases, 16,757 East Asian ancestry controls, 6,152 African American cases, 3,918 African American controls, 1,234 Latino cases, 3,090 Latino controls	1,979 European ancestry cases, 142,626 European ancestry controls	10q21.1	10	52303323		PRKG1-AS1			ENSG00000236671			rs12771371-G	rs12771371	0	12771371	intergenic_variant	0	0.74	3e-07	6.52288		1.0431	[1.03-1.06]	Affymetrix [7585078] (imputed)	N	schizophrenia	http://purl.obolibrary.org/obo/MONDO_0005090	GCST90128471	Genome-wide genotyping array
	2023-02-09	36224396	Yengo L	2022-10-12	Nature	www.ncbi.nlm.nih.gov/pubmed/36224396	A saturated map of common genetic variants associated with human height.	Height	5,314,291 European ancestry, Hispanic or Latin American, East Asian ancestry, African ancestry, South Asian ancestry individuals	NA	10q11.23	10	50972159		MIX23P2 - PRKG1	ENSG00000236944	ENSG00000185532		8801	18729	rs7096841-T	rs7096841	0	7096841	intergenic_variant	1	0.0334	3e-44	43.5229		0.0255	[0.022-0.029] unit increase	Affymetrix, Illumina [1385132] (imputed)	N	body height	http://purl.obolibrary.org/obo/OBA_VT0001253	GCST90245848	Genome-wide genotyping array
	2023-02-09	36224396	Yengo L	2022-10-12	Nature	www.ncbi.nlm.nih.gov/pubmed/36224396	A saturated map of common genetic variants associated with human height.	Height	5,314,291 European ancestry, Hispanic or Latin American, East Asian ancestry, African ancestry, South Asian ancestry individuals	NA	10q11.23	10	50987863		MIX23P2 - PRKG1	ENSG00000236944	ENSG00000185532		24505	3025	rs6479835-T	rs6479835	0	6479835	intergenic_variant	1	0.3399	1e-75	75		0.012	[0.011-0.013] unit increase	Affymetrix, Illumina [1385132] (imputed)	N	body height	http://purl.obolibrary.org/obo/OBA_VT0001253	GCST90245848	Genome-wide genotyping array
	2020-07-28	32450446	Wang H	2020-04-29	Neurobiol Aging	www.ncbi.nlm.nih.gov/pubmed/32450446	Genome-wide interaction analysis of pathological hallmarks in Alzheimer's disease.	Total PHF-tau (SNP x SNP interaction)	1,285 individuals	NA	10q21.1 x 8p23.1	10 x 8	52227002 x 6597563	NR x NR	PRKG1-AS1, PRKG1 x MCPH1						rs7909343-? x rs17631156-?	rs7909343 x rs17631156	0		intron_variant x intron_variant		NR	1e-08	8				Affymetrix, Illumina [279409] (imputed)	N	PHF-tau measurement	http://www.ebi.ac.uk/efo/EFO_0010750	GCST010340	Genome-wide genotyping array
	2020-07-28	32450446	Wang H	2020-04-29	Neurobiol Aging	www.ncbi.nlm.nih.gov/pubmed/32450446	Genome-wide interaction analysis of pathological hallmarks in Alzheimer's disease.	Total PHF-tau (SNP x SNP interaction)	1,285 individuals	NA	14q23.1 x 10q21.1	14 x 10	58790173 x 51472348	NR x NR	LINC01500 x PRKG1						rs413584-? x rs10823056-?	rs413584 x rs10823056	0		intergenic_variant x intron_variant		NR	3e-09	8.52288				Affymetrix, Illumina [279409] (imputed)	N	PHF-tau measurement	http://www.ebi.ac.uk/efo/EFO_0010750	GCST010340	Genome-wide genotyping array
	2015-02-20	24939585	Fransen E	2014-06-18	Eur J Hum Genet	www.ncbi.nlm.nih.gov/pubmed/24939585	Genome-wide association analysis demonstrates the highly polygenic character of age-related hearing impairment.	Age-related hearing impairment (SNP x SNP interaction)	1,489 European ancestry individuals	NA	10q21.1 x 12q24.31	10 x 12	52010479 x 120627474	NR x NR	PRKG1 x RPL11P5 - CABP1-DT						rs1903989-? x rs4767920-?	rs1903989 x rs4767920	0		intron_variant x intergenic_variant		NR	1e-09	9				Illumina [629437] (imputed)	N	age-related hearing impairment	http://www.ebi.ac.uk/efo/EFO_0005782	GCST002487	Genome-wide genotyping array
	2016-04-12	25948407	Kertai MD	2015-05-06	BMJ Open	www.ncbi.nlm.nih.gov/pubmed/25948407	Genome-wide association study of perioperative myocardial infarction after coronary artery bypass surgery.	Perioperative myocardial infarction in coronary artery bypass surgery	112 cases, 1,321 controls	113 European ancestry cases, 509 European ancestry controls	2q37.3	2	239313206	HDAC4	HDAC4			ENSG00000068024			rs10200850-?	rs10200850	0	10200850	intron_variant	0	NR	8e-06	5.09691		2.23	[1.57-3.17]	Illumina [534390]	N	myocardial infarction	http://www.ebi.ac.uk/efo/EFO_0000612	GCST002892	Genome-wide genotyping array
	2017-12-18	29077507	Chen H	2017-10-27	Am J Respir Cell Mol Biol	www.ncbi.nlm.nih.gov/pubmed/29077507	Multi-ethnic Meta-analysis Identifies RAI1 as a Possible Obstructive Sleep Apnea Related Quantitative Trait Locus in Men.	Obstructive sleep apnea trait (apnea hypopnea index)	677 African American women, 544 African American men, 115 Asian women, 113 Asian men, 1,825 European ancestry women, 3,902 European ancestry men, 7,492 Hispanic women, 5,065 Hispanic men	NA	2q37.3	2	239061180	HDAC4	HDAC4			ENSG00000068024			rs62189527-C	rs62189527	0	62189527	intron_variant	0	NR	7e-07	6.1549	(men)	0.32	[NR] unit increase	Affymetrix, Illumina [NR] (imputed)	N	sleep apnea measurement	http://www.ebi.ac.uk/efo/EFO_0007817	GCST005051	Genome-wide genotyping array
	2019-05-02	30487518	Takeuchi F	2018-11-28	Nat Commun	www.ncbi.nlm.nih.gov/pubmed/30487518	Interethnic analyses of blood pressure loci in populations of East Asian and European descent.	Systolic blood pressure	130,777 Japanese ancestry individuals	53,008 East Asian individuals, 105,253 European ancestry individuals	2q37.3	2	239286459	HDAC4	HDAC4			ENSG00000068024			rs2048765-A	rs2048765	0	2048765	intron_variant	0	0.65	2e-06	5.69897	(Japanese)	0.3691	[0.22-0.52] unit decrease	Illumina [6200000] (imputed)	N	systolic blood pressure	http://www.ebi.ac.uk/efo/EFO_0006335	GCST007703	Genome-wide genotyping array
	2019-02-08	30595370	Kichaev G	2018-12-27	Am J Hum Genet	www.ncbi.nlm.nih.gov/pubmed/30595370	Leveraging Polygenic Functional Enrichment to Improve GWAS Power.	Heel bone mineral density	approximately 446,000 European ancestry individuals	NA	2q37.3	2	239323842		HDAC4			ENSG00000068024			rs59022814-?	rs59022814	0	59022814	intron_variant	0	NR	4e-08	7.39794				NR [~ 8900000] (imputed)	N	heel bone mineral density	http://www.ebi.ac.uk/efo/EFO_0009270	GCST007066	Genome-wide genotyping array
	2019-05-02	30487518	Takeuchi F	2018-11-28	Nat Commun	www.ncbi.nlm.nih.gov/pubmed/30487518	Interethnic analyses of blood pressure loci in populations of East Asian and European descent.	Mean arterial pressure	130,777 Japanese ancestry individuals	53,008 East Asian individuals, 105,253 European ancestry individuals	2q37.3	2	239286459	HDAC4	HDAC4			ENSG00000068024			rs2048765-A	rs2048765	0	2048765	intron_variant	0	0.6489	2e-07	6.69897	(Japanese)	0.2895	[0.18-0.4] unit decrease	Illumina [6200000] (imputed)	N	mean arterial pressure	http://www.ebi.ac.uk/efo/EFO_0006340	GCST007706	Genome-wide genotyping array
	2019-04-03	30429480	Duffy DL	2018-11-14	Nat Commun	www.ncbi.nlm.nih.gov/pubmed/30429480	Novel pleiotropic risk loci for melanoma and nevus density implicate multiple biological pathways.	Nevus count or cutaneous melanoma	52,506 European ancestry individuals, 12,874 European ancestry cases, 23,203 European ancestry controls	NA	2q37.3	2	239154306	HDAC4	HDAC4			ENSG00000068024			rs55875066-?	rs55875066	0	55875066	intron_variant	0	NR	1e-09	9				Affymetrix, Illumina [7850345] (imputed)	N	nevus count, cutaneous melanoma	http://www.ebi.ac.uk/efo/EFO_0004632, http://www.ebi.ac.uk/efo/EFO_0000389	GCST007505	Genome-wide genotyping array
	2019-04-03	30429480	Duffy DL	2018-11-14	Nat Commun	www.ncbi.nlm.nih.gov/pubmed/30429480	Novel pleiotropic risk loci for melanoma and nevus density implicate multiple biological pathways.	Nevus count	52,506 European ancestry individuals	NA	2q37.3	2	239154306	HDAC4	HDAC4			ENSG00000068024			rs55875066-?	rs55875066	0	55875066	intron_variant	0	NR	8e-07	6.09691	(fixed effects)			Affymetrix, Illumina [up to 31337615] (imputed)	N	nevus count	http://www.ebi.ac.uk/efo/EFO_0004632	GCST007504	Genome-wide genotyping array
	2019-05-02	30487518	Takeuchi F	2018-11-28	Nat Commun	www.ncbi.nlm.nih.gov/pubmed/30487518	Interethnic analyses of blood pressure loci in populations of East Asian and European descent.	Diastolic blood pressure	130,777 Japanese ancestry individuals	53,008 East Asian individuals, 105,253 European ancestry individuals	2q37.3	2	239286459	HDAC4	HDAC4			ENSG00000068024			rs2048765-A	rs2048765	0	2048765	intron_variant	0	0.6489	7e-07	6.1549	(Japanese)	0.2482	[0.15-0.35] unit decrease	Illumina [6200000] (imputed)	N	diastolic blood pressure	http://www.ebi.ac.uk/efo/EFO_0006336	GCST007704	Genome-wide genotyping array
	2019-02-01	30573740	Yap CX	2018-12-20	Nat Commun	www.ncbi.nlm.nih.gov/pubmed/30573740	Dissection of genetic variation and evidence for pleiotropy in male pattern baldness.	Male-pattern baldness	205,327 European ancestry males	NA	2q37.3	2	239093078	NR	HDAC4			ENSG00000068024			rs4852018-A	rs4852018	0	4852018	intron_variant	0	0.459875	5e-09	8.30103		0.0179154	[0.012-0.024] unit increase	NR [19129689] (imputed)	N	balding measurement	http://www.ebi.ac.uk/efo/EFO_0007825	GCST007020	Genome-wide genotyping array
	2019-02-01	30573740	Yap CX	2018-12-20	Nat Commun	www.ncbi.nlm.nih.gov/pubmed/30573740	Dissection of genetic variation and evidence for pleiotropy in male pattern baldness.	Male-pattern baldness	205,327 European ancestry males	NA	2q37.3	2	239163978	NR	HDAC4			ENSG00000068024			rs13010577-C	rs13010577	0	13010577	intron_variant	0	0.426856	2e-10	9.69897		0.0199069	[0.014-0.026] unit increase	NR [19129689] (imputed)	N	balding measurement	http://www.ebi.ac.uk/efo/EFO_0007825	GCST007020	Genome-wide genotyping array
	2019-02-08	30595370	Kichaev G	2018-12-27	Am J Hum Genet	www.ncbi.nlm.nih.gov/pubmed/30595370	Leveraging Polygenic Functional Enrichment to Improve GWAS Power.	Lung function (FEV1/FVC)	approximately 370,000 European ancestry individuals	NA	2q37.3	2	239187781		HDAC4			ENSG00000068024			rs3791553-?	rs3791553	0	3791553	intron_variant	0	NR	7e-10	9.1549				NR [~ 8900000] (imputed)	N	FEV/FVC ratio	http://www.ebi.ac.uk/efo/EFO_0004713	GCST007080	Genome-wide genotyping array
	2019-02-08	30595370	Kichaev G	2018-12-27	Am J Hum Genet	www.ncbi.nlm.nih.gov/pubmed/30595370	Leveraging Polygenic Functional Enrichment to Improve GWAS Power.	Morning person	approximately 410,000 European ancestry individuals	NA	2q37.3	2	239345610		HDAC4			ENSG00000068024			rs62182135-?	rs62182135	0	62182135	intron_variant	0	NR	4e-08	7.39794				NR [~ 8900000] (imputed)	N	chronotype measurement	http://www.ebi.ac.uk/efo/EFO_0008328	GCST007083	Genome-wide genotyping array
	2020-07-23	32341527	Landi MT	2020-04-27	Nat Genet	www.ncbi.nlm.nih.gov/pubmed/32341527	Genome-wide association meta-analyses combining multiple risk phenotypes provide insights into the genetic architecture of cutaneous melanoma susceptibility.	Nevus count or cutaneous melanoma	36,760 European ancestry cutaneous melanoma cases, 375,188 European ancestry controls, 12,930 European ancestry individuals, 52,847 individuals	NA	2q37.3	2	239143660	AC017028.1	HDAC4			ENSG00000068024			rs11677464-A	rs11677464	0	11677464	intron_variant	0	0.904327	1e-09	9				Affymetrix, Illumina [NR] (imputed)	N	nevus count, cutaneous melanoma	http://www.ebi.ac.uk/efo/EFO_0004632, http://www.ebi.ac.uk/efo/EFO_0000389	GCST010303	Genome-wide genotyping array
	2013-06-06	23453885	Smoller JW	2013-02-27	Lancet	www.ncbi.nlm.nih.gov/pubmed/23453885	Identification of risk loci with shared effects on five major psychiatric disorders: a genome-wide analysis.	Autism spectrum disorder, attention deficit-hyperactivity disorder, bipolar disorder, major depressive disorder, and schizophrenia (combined)	6,990 European ancestry Bipolar disorder cases, 9,227 European ancestry Major depressive disorder cases, 9,379 European ancestry Schizophrenia cases, 161 European ancestry Autism spectrum disorder cases, 4,788 European ancestry Autism spectrum disorder trio cases, 840 European ancestry Attention deficit-hyperactivity disorder cases, 1,947 European ancestry Attention defcit-hyperactivity disorder …	NA	2q37.3	2	239191276	HDAC4, MGC16025	HDAC4			ENSG00000068024			rs3791556-A	rs3791556	0	3791556	intron_variant	0	NR	8e-06	5.09691	(Modelling analysis)	1.08	[1.04-1.11]	NR [1252901] (imputed)	N	attention deficit hyperactivity disorder, bipolar disorder, autism spectrum disorder, schizophrenia, major depressive disorder	http://www.ebi.ac.uk/efo/EFO_0003888, http://purl.obolibrary.org/obo/MONDO_0004985, http://www.ebi.ac.uk/efo/EFO_0003756, http://purl.obolibrary.org/obo/MONDO_0005090, http://purl.obolibrary.org/obo/MONDO_0002009	GCST001877	Genome-wide genotyping array
	2020-01-09	23823483	Rhee EP	2013-07-02	Cell Metab	www.ncbi.nlm.nih.gov/pubmed/23823483	A genome-wide association study of the human metabolome in a community-based cohort.	Metabolite levels	2,076 European ancestry individuals	NA	2q37.3	2	239295342	NDUFA10	HDAC4			ENSG00000068024			rs11883563-?	rs11883563	0	11883563	intron_variant	0	NR	4e-06	5.39794	(ornithine)	1.26453	[0.73-1.8] unit increase	Affymetrix [at least 2500000] (imputed)	N	ornithine measurement	http://www.ebi.ac.uk/efo/EFO_0009776	GCST009391	Genome-wide genotyping array
	2020-01-09	23823483	Rhee EP	2013-07-02	Cell Metab	www.ncbi.nlm.nih.gov/pubmed/23823483	A genome-wide association study of the human metabolome in a community-based cohort.	Metabolite levels	2,076 European ancestry individuals	NA	2q37.3	2	239098926	ASB1	HDAC4			ENSG00000068024			rs4852019-?	rs4852019	0	4852019	intron_variant	0	NR	9e-07	6.04576	(anthranilic acid)	0.164542	[0.099-0.23] unit increase	Affymetrix [at least 2500000] (imputed)	N	anthranilic acid measurement	http://www.ebi.ac.uk/efo/EFO_0010460	GCST009391	Genome-wide genotyping array
	2019-02-28	30287865	Pinar A	2018-10-04	Transl Psychiatry	www.ncbi.nlm.nih.gov/pubmed/30287865	Genome-wide association study reveals novel genetic locus associated with intra-individual variability in response time.	Intra-individual response time variability (selective attention)	857 European ancestry individuals	NA	2q37.3	2	239283800	HDAC4	HDAC4			ENSG00000068024			rs62182100-G	rs62182100	0	62182100	intron_variant	0	0.05525	3e-08	7.52288	(intra-individual coefficient of variation)	0.62	[NR] unit increase	Illumina [5408162] (imputed)	N	intra-individual reaction time variability measurement	http://www.ebi.ac.uk/efo/EFO_0009702	GCST007243	Genome-wide genotyping array
	2019-02-28	30287865	Pinar A	2018-10-04	Transl Psychiatry	www.ncbi.nlm.nih.gov/pubmed/30287865	Genome-wide association study reveals novel genetic locus associated with intra-individual variability in response time.	Intra-individual response time variability (selective attention)	857 European ancestry individuals	NA	2q37.3	2	239283800	HDAC4	HDAC4			ENSG00000068024			rs62182100-G	rs62182100	0	62182100	intron_variant	0	0.05525	3e-08	7.52288	(standard deviation)	0.63	unit increase	Illumina [5408162] (imputed)	N	intra-individual reaction time variability measurement	http://www.ebi.ac.uk/efo/EFO_0009702	GCST007243	Genome-wide genotyping array
	2018-10-19	30038396	Lee JJ	2018-07-23	Nat Genet	www.ncbi.nlm.nih.gov/pubmed/30038396	Gene discovery and polygenic prediction from a genome-wide association study of educational attainment in 1.1 million individuals.	Educational attainment (years of education)	up to 1,131,881 European ancestry individuals	NA	2q37.3	2	239343922		HDAC4			ENSG00000068024			rs6706275-T	rs6706275	0	6706275	intron_variant	0	0.3246	3e-08	7.52288		0.0083	[0.0054-0.0112] unit increase	Affymetrix, Illumina [10000000] (imputed)	N	self reported educational attainment	http://www.ebi.ac.uk/efo/EFO_0004784	GCST006442	Genome-wide genotyping array
	2018-10-19	30038396	Lee JJ	2018-07-23	Nat Genet	www.ncbi.nlm.nih.gov/pubmed/30038396	Gene discovery and polygenic prediction from a genome-wide association study of educational attainment in 1.1 million individuals.	Educational attainment (years of education)	up to 1,131,881 European ancestry individuals	NA	2q37.3	2	239399357		HDAC4			ENSG00000068024			rs72993796-T	rs72993796	0	72993796	intron_variant	0	0.8836	1e-08	8		0.0127	[0.0084-0.017] unit increase	Affymetrix, Illumina [10000000] (imputed)	N	self reported educational attainment	http://www.ebi.ac.uk/efo/EFO_0004784	GCST006442	Genome-wide genotyping array
	2019-04-15	30696823	Jones SE	2019-01-29	Nat Commun	www.ncbi.nlm.nih.gov/pubmed/30696823	Genome-wide association analyses of chronotype in 697,828 individuals provides insights into circadian rhythms.	Chronotype	449,734 European ancestry individuals	248,098 European ancestry individuals	2q37.3	2	239345610	HDAC4	HDAC4			ENSG00000068024			rs62182135-C	rs62182135	0	62182135	intron_variant	0	0.6715	1e-12	12		1.0245		Affymetrix [11880941] (imputed)	N	chronotype measurement	http://www.ebi.ac.uk/efo/EFO_0008328	GCST007576	Genome-wide genotyping array
	2019-04-25	30920136	Stapleton CP	2019-02-27	Am J Transplant	www.ncbi.nlm.nih.gov/pubmed/30920136	The impact of donor and recipient common clinical and genetic variation on estimated glomerular filtration rate in a European renal transplant population.	Estimated glomerular filtration rate after 5 years in renal transplantation (recipient effect)	Up to 2,921 European ancestry individuals	NA	2q37.3	2	239391047	HDAC4	HDAC4			ENSG00000068024			rs4852063-A	rs4852063	0	4852063	intron_variant	0	NR	8e-06	5.09691	(adjusted for clinical variables)			Illumina [up to 3935887] (imputed)	N	renal transplant outcome measurement, glomerular filtration rate	http://www.ebi.ac.uk/efo/EFO_0005199, http://purl.obolibrary.org/obo/OBA_0003747	GCST007649	Genome-wide genotyping array
	2021-09-27	33887147	Young WJ	2021-04-22	Circ Genom Precis Med	www.ncbi.nlm.nih.gov/pubmed/33887147	Genetically-Determined Serum Calcium Levels and Markers of Ventricular Repolarisation: A Mendelian Randomization Study in the UK Biobank.	Calcium levels	305,349 European ancestry individuals	NA	2q37.3	2	239363622	NR	HDAC4			ENSG00000068024			rs10197122-T	rs10197122	0	10197122	intron_variant	0	0.0721	1e-08	8		0.002422	[0.0016-0.0033] mmol/L increase	Affymetrix [NR] (imputed)	N	calcium measurement	http://www.ebi.ac.uk/efo/EFO_0004838	GCST012398	Genome-wide genotyping array
	2017-08-21	28502801	Law MH	2017-05-11	J Invest Dermatol	www.ncbi.nlm.nih.gov/pubmed/28502801	Genome-Wide Association Shows that¬†Pigmentation Genes Play a Role in Skin¬†Aging.	Skin aging (microtopography measurement)	5,087 individuals	NA	2q37.3	2	239108788	OR6B2	HDAC4			ENSG00000068024			rs3791406-A	rs3791406	0	3791406	intron_variant	0	NR	6e-06	5.22185		0.069	[NR] unit decrease	Illumina [at least 233546] (imputed)	N	aging rate	http://purl.obolibrary.org/obo/OBA_0005494	GCST004574	Genome-wide genotyping array
	2018-07-28	29403010	Kanai M	2018-02-05	Nat Genet	www.ncbi.nlm.nih.gov/pubmed/29403010	Genetic analysis of quantitative traits in the Japanese population links cell types to complex human diseases.	Mean arterial pressure	136,482 Japanese ancestry individuals	NA	2q37.3	2	239286459	HDAC4	HDAC4			ENSG00000068024			rs2048765-?	rs2048765	0	2048765	intron_variant	0	NR	5e-08	7.30103		0.02185	[0.014-0.03] unit increase novel	Illumina [6108953] (imputed)	N	mean arterial pressure	http://www.ebi.ac.uk/efo/EFO_0006340	GCST006010	Genome-wide genotyping array
	2022-03-08	35165267	Boua PR	2022-02-14	Nat Commun	www.ncbi.nlm.nih.gov/pubmed/35165267	Genetic associations with carotid intima-media thickness link to atherosclerosis with sex-specific effects in sub-Saharan Africans.	Carotid Intima-media thickness (mean of the maximum cIMT)	3,963 Sub-Saharan African ancestry females, 3,931 Sub-Saharan African ancestry males	NA	2q37.3	2	239141525		HDAC4			ENSG00000068024			rs148639441-C	rs148639441	0	148639441	intron_variant	0	0.988046	5e-06	5.30103		0.0463195	[0.022-0.071] unit increase	Illumina [7666802] (imputed)	N	carotid artery thickness	http://purl.obolibrary.org/obo/OBA_2050108	GCST90092505	Genome-wide genotyping array
	2024-08-05	39048560	Pozarickij A	2024-07-24	Nat Commun	www.ncbi.nlm.nih.gov/pubmed/39048560	Causal relevance of different blood pressure traits on risk of cardiovascular diseases: GWAS and Mendelian randomisation in 100,000 Chinese adults.	Systolic blood pressure (BMI unadjusted)	100,453 Chinese Han ancestry individuals	NA	2q37.3	2	239273605		HDAC4			ENSG00000068024			rs56137247-A	rs56137247	0	56137247	intron_variant	0	0.549	5e-10	9.30103		0.6154	[0.42-0.81] unit increase	Affymetrix [10272632] (imputed)	N	systolic blood pressure	http://www.ebi.ac.uk/efo/EFO_0006335	GCST90335162	Genome-wide genotyping array
	2024-08-05	39048560	Pozarickij A	2024-07-24	Nat Commun	www.ncbi.nlm.nih.gov/pubmed/39048560	Causal relevance of different blood pressure traits on risk of cardiovascular diseases: GWAS and Mendelian randomisation in 100,000 Chinese adults.	Diastolic blood pressure (BMI adjusted)	100,453 Chinese Han ancestry individuals	NA	2q37.3	2	239346979		HDAC4			ENSG00000068024			rs34061813-A	rs34061813	0	34061813	intron_variant	0	0.57	2e-08	7.69897		0.2941	[0.19-0.4] unit increase	Affymetrix [10272632] (imputed)	N	diastolic blood pressure	http://www.ebi.ac.uk/efo/EFO_0006336	GCST90335165	Genome-wide genotyping array
	2024-08-05	39048560	Pozarickij A	2024-07-24	Nat Commun	www.ncbi.nlm.nih.gov/pubmed/39048560	Causal relevance of different blood pressure traits on risk of cardiovascular diseases: GWAS and Mendelian randomisation in 100,000 Chinese adults.	Mean arterial pressure (BMI unadjusted)	100,453 Chinese Han ancestry individuals	NA	2q37.3	2	239273605		HDAC4			ENSG00000068024			rs56137247-A	rs56137247	0	56137247	intron_variant	0	0.549	7e-11	10.1549		0.4236	[0.3-0.55] unit increase	Affymetrix [10272632] (imputed)	N	mean arterial pressure	http://www.ebi.ac.uk/efo/EFO_0006340	GCST90335168	Genome-wide genotyping array
	2024-08-05	39048560	Pozarickij A	2024-07-24	Nat Commun	www.ncbi.nlm.nih.gov/pubmed/39048560	Causal relevance of different blood pressure traits on risk of cardiovascular diseases: GWAS and Mendelian randomisation in 100,000 Chinese adults.	Mean arterial pressure (BMI adjusted)	100,453 Chinese Han ancestry individuals	NA	2q37.3	2	239273605		HDAC4			ENSG00000068024			rs56137247-A	rs56137247	0	56137247	intron_variant	0	0.549	4e-09	8.39794		0.3635	[0.24-0.49] unit increase	Affymetrix [10272632] (imputed)	N	mean arterial pressure	http://www.ebi.ac.uk/efo/EFO_0006340	GCST90335169	Genome-wide genotyping array
	2024-08-05	39048560	Pozarickij A	2024-07-24	Nat Commun	www.ncbi.nlm.nih.gov/pubmed/39048560	Causal relevance of different blood pressure traits on risk of cardiovascular diseases: GWAS and Mendelian randomisation in 100,000 Chinese adults.	Diastolic blood pressure (BMI unadjusted)	100,453 Chinese Han ancestry individuals	NA	2q37.3	2	239346979		HDAC4			ENSG00000068024			rs34061813-A	rs34061813	0	34061813	intron_variant	0	0.57	5e-10	9.30103		0.3411	[0.23-0.45] unit increase	Affymetrix [10272632] (imputed)	N	diastolic blood pressure	http://www.ebi.ac.uk/efo/EFO_0006336	GCST90335164	Genome-wide genotyping array
	2024-08-05	39048560	Pozarickij A	2024-07-24	Nat Commun	www.ncbi.nlm.nih.gov/pubmed/39048560	Causal relevance of different blood pressure traits on risk of cardiovascular diseases: GWAS and Mendelian randomisation in 100,000 Chinese adults.	Systolic blood pressure (BMI adjusted)	100,453 Chinese Han ancestry individuals	NA	2q37.3	2	239273605		HDAC4			ENSG00000068024			rs56137247-A	rs56137247	0	56137247	intron_variant	0	0.549	2e-08	7.69897		0.5289	[0.35-0.71] unit increase	Affymetrix [10272632] (imputed)	N	systolic blood pressure	http://www.ebi.ac.uk/efo/EFO_0006335	GCST90335163	Genome-wide genotyping array
	2023-08-18	36867504	Mu G	2023-03-03	Expert Opin Drug Metab Toxicol	www.ncbi.nlm.nih.gov/pubmed/36867504	Identification of genetic biomarkers associated with pharmacokinetics and pharmacodynamics of apixaban in Chinese healthy volunteers.	Concentration of apixaban (at 3h)	181 Chinese ancestry individuals	NA	2q37.3	2	239122738		HDAC4			ENSG00000068024			rs138105811-?	rs138105811	0	138105811	intron_variant	0	NR	3e-08	7.52288				Affymetrix [NR]	N	trait in response to apixaban	http://purl.obolibrary.org/obo/OBA_2050328	GCST90271717	Genome-wide genotyping array
	2023-08-18	36867504	Mu G	2023-03-03	Expert Opin Drug Metab Toxicol	www.ncbi.nlm.nih.gov/pubmed/36867504	Identification of genetic biomarkers associated with pharmacokinetics and pharmacodynamics of apixaban in Chinese healthy volunteers.	Concentration of apixaban (at 3h)	181 Chinese ancestry individuals	NA	2q37.3	2	239134270		HDAC4			ENSG00000068024			rs35291459-?	rs35291459	0	35291459	synonymous_variant	0	NR	3e-08	7.52288				Affymetrix [NR]	N	trait in response to apixaban	http://purl.obolibrary.org/obo/OBA_2050328	GCST90271717	Genome-wide genotyping array
	2023-08-18	36867504	Mu G	2023-03-03	Expert Opin Drug Metab Toxicol	www.ncbi.nlm.nih.gov/pubmed/36867504	Identification of genetic biomarkers associated with pharmacokinetics and pharmacodynamics of apixaban in Chinese healthy volunteers.	Concentration of apixaban (at 3h)	181 Chinese ancestry individuals	NA	2q37.3	2	239136889		HDAC4			ENSG00000068024			rs6759400-?	rs6759400	0	6759400	intron_variant	0	NR	3e-08	7.52288				Affymetrix [NR]	N	trait in response to apixaban	http://purl.obolibrary.org/obo/OBA_2050328	GCST90271717	Genome-wide genotyping array
	2022-12-21	36477530	Saunders GRB	2022-12-07	Nature	www.ncbi.nlm.nih.gov/pubmed/36477530	Genetic diversity fuels gene discovery for tobacco and alcohol use.	Smoking initiation	2,669,029 European ancestry individuals	NA	2q37.3	2	239185409		HDAC4			ENSG00000068024			rs11681247-A	rs11681247	0	11681247	intron_variant	0	0.285	3e-10	9.52288		0.00612	[0.0042-0.008] unit increase	NR [NR] (imputed)	N	smoking initiation	http://www.ebi.ac.uk/efo/EFO_0005670	GCST90243968	Genome-wide genotyping array, Genome-wide sequencing
	2023-04-27	36620623	Ahn J	2022-12-22	Front Cardiovasc Med	www.ncbi.nlm.nih.gov/pubmed/36620623	Genome-wide association study for vascular aging highlights pathways shared with cardiovascular traits in Koreans.	Vascular endothelial function	97 Korean ancestry individuals	NA	2q37.3	2	239234616		HDAC4			ENSG00000068024			rs59539170-C	rs59539170	0	59539170	intron_variant	0	NR	4e-06	5.39794		2.0074	[1.16-2.86] unit increase	Illumina [177236]	N	vascular endothelial function measurement	http://www.ebi.ac.uk/efo/EFO_0803369	GCST90255362	Genome-wide genotyping array
	2019-06-25	30804565	Jansen PR	2019-02-25	Nat Genet	www.ncbi.nlm.nih.gov/pubmed/30804565	Genome-wide analysis of insomnia in 1,331,010 individuals identifies new risk loci and functional pathways.	Morningness	434,835 European ancestry individuals	NA	2q37.3	2	239345610		HDAC4			ENSG00000068024			rs62182135-A	rs62182135	0	62182135	intron_variant	0	0.3305	8e-09	8.09691		0.013	[0.0091-0.0169] unit decrease	Affymetrix, Illumina [11597492] (imputed)	N	chronotype measurement	http://www.ebi.ac.uk/efo/EFO_0008328	GCST007983	Genome-wide genotyping array
Yes	2021-07-30	33104735	Lundtoft C	2020-10-26	PLoS Genet	www.ncbi.nlm.nih.gov/pubmed/33104735	Function of multiple sclerosis-protective HLA class I alleles revealed by genome-wide protein-quantitative trait loci mapping of interferon signalling.	interferon-related traits	303 European ancestry individuals	NA	2q37.3	2	239153894	NR	HDAC4			ENSG00000068024			rs3791501-C	rs3791501	0	3791501	intron_variant	0	0.438	1e-06	6	(IFNalpha_CXCL10_of_CD20p)			Illumina [5084123] (imputed)	N	cytokine measurement	http://www.ebi.ac.uk/efo/EFO_0004873	GCST012156	Genome-wide genotyping array
	2021-01-26	32376654	Richardson TG	2020-05-06	BMJ	www.ncbi.nlm.nih.gov/pubmed/32376654	Use of genetic variation to separate the effects of early and later life adiposity on disease risk: mendelian randomisation study.	Body size at age 10	453,169 European ancestry individuals	NA	2q37.3	2	239142443	HDAC4	HDAC4			ENSG00000068024			rs3791478-T	rs3791478	0	3791478	intron_variant	0	0.890549	3e-08	7.52288		0.0125091	[0.0081-0.0169] unit increase	Affymetrix [12370749]	N	comparative body size at age 10, self-reported	http://www.ebi.ac.uk/efo/EFO_0009819	GCST010989	Genome-wide genotyping array
	2022-09-01	31882771	Al-Khelaifi F	2019-12-27	Sci Rep	www.ncbi.nlm.nih.gov/pubmed/31882771	Metabolic GWAS of elite athletes reveals novel genetically-influenced metabolites associated with athletic performance.	3-methylglutaconate levels in elite athletes	490 individuals	NA	2q37.3	2	239201394		HDAC4			ENSG00000068024			rs11689823-?	rs11689823	0	11689823	intron_variant	0	NR	1e-05	5		0.522398	[0.29-0.75] unit decrease	Illumina [275016]	N	amino acid measurement	http://www.ebi.ac.uk/efo/EFO_0005134	GCST90133528	Genome-wide genotyping array
	2022-09-01	31882771	Al-Khelaifi F	2019-12-27	Sci Rep	www.ncbi.nlm.nih.gov/pubmed/31882771	Metabolic GWAS of elite athletes reveals novel genetically-influenced metabolites associated with athletic performance.	1-oleoyl-GPI (18:1) levels in elite athletes	490 individuals	NA	2q37.3	2	239100526		HDAC4			ENSG00000068024			rs78576559-?	rs78576559	0	78576559	intron_variant	0	NR	3e-06	5.52288		1.24663	[0.73-1.76] unit decrease	Illumina [275016]	N	lipid measurement	http://www.ebi.ac.uk/efo/EFO_0004529	GCST90133706	Genome-wide genotyping array
	2022-09-01	31882771	Al-Khelaifi F	2019-12-27	Sci Rep	www.ncbi.nlm.nih.gov/pubmed/31882771	Metabolic GWAS of elite athletes reveals novel genetically-influenced metabolites associated with athletic performance.	Hexadecadienoate (16:2n6) levels in elite athletes	490 individuals	NA	2q37.3	2	239054321		HDAC4			ENSG00000068024			rs6741865-?	rs6741865	0	6741865	intron_variant	0	NR	6e-06	5.22185		0.36514	[0.21-0.52] unit decrease	Illumina [275016]	N	lipid measurement	http://www.ebi.ac.uk/efo/EFO_0004529	GCST90133969	Genome-wide genotyping array
	2022-07-01	35361970	Okbay A	2022-03-31	Nat Genet	www.ncbi.nlm.nih.gov/pubmed/35361970	Polygenic prediction of educational attainment within and between families from genome-wide association analyses in 3 million individuals.	Educational attainment	3,037,499 European ancestry individuals	NA	2q37.3	2	239399357		HDAC4			ENSG00000068024			rs72993796-T	rs72993796	0	72993796	intron_variant	0	0.882	9e-20	19.0458		0.0148511	[0.012-0.018] unit increase	Illumina [10675380] (imputed)	N	educational attainment	http://www.ebi.ac.uk/efo/EFO_0011015	GCST90105038	Genome-wide genotyping array
	2023-08-09	37471560	Kun E	2023-07-21	Science	www.ncbi.nlm.nih.gov/pubmed/37471560	The genetic architecture and evolution of the human skeletal form.	Femur length to body height ratio	31,221 British ancestry individuals	NA	2q37.3	2	239143660		HDAC4			ENSG00000068024			rs11677464-?	rs11677464	0	11677464	intron_variant	0	NR	2e-10	9.69897		0.000529878	[0.00037-0.00069] unit increase	Affymetrix [7387826] (imputed)	N	anthropometric measurement	http://www.ebi.ac.uk/efo/EFO_0004302	GCST90270256	Genome-wide genotyping array
	2024-05-16	38689001	Keaton JM	2024-04-30	Nat Genet	www.ncbi.nlm.nih.gov/pubmed/38689001	Genome-wide analysis in over 1 million individuals of European ancestry yields improved polygenic risk scores for blood pressure traits.	Pulse pressure	1,028,980 European ancestry individuals	62,047 African ancestry individuals, 21,843 African American individuals	2q37.3	2	239329596		HDAC4			ENSG00000068024			rs68080737-A	rs68080737	0	68080737	intron_variant	0	NR	4e-06	5.39794	(EA)	0.1608	[0.092-0.229] unit increase	NR [7568424] (imputed)	N	pulse pressure measurement	http://www.ebi.ac.uk/efo/EFO_0005763	GCST90310296	Genome-wide genotyping array
	2024-04-30	38538606	Harris BHL	2024-03-27	Sci Rep	www.ncbi.nlm.nih.gov/pubmed/38538606	New role of fat-free mass in cancer risk linked with genetic predisposition.	Colorectal cancer	4,988 European ancestry cases, 310,272 European ancestry controls	NA	2q37.3	2	239262107		HDAC4			ENSG00000068024			rs545916948-T	rs545916948	0	545916948	intron_variant	0	NR	3e-06	5.52288		1.10336	[0.64-1.57] unit increase	Affymetrix [18894319] (imputed)	N	colorectal cancer	http://purl.obolibrary.org/obo/MONDO_0005575	GCST90428118	Genome-wide genotyping array
	2024-05-08	38658550	Cho C	2024-04-24	Nat Commun	www.ncbi.nlm.nih.gov/pubmed/38658550	Large-scale cross-ancestry genome-wide meta-analysis of serum urate.	Serum urate levels	219,768 East Asian ancestry individuals, 677,373 European ancestry individuals, 132,182 individuals	NA	2q37.3	2	239300869		HDAC4			ENSG00000068024			rs12623489-A	rs12623489	0	12623489	intron_variant	0	NR	1e-08	8		0.0195	[0.013-0.026] unit decrease	NR [9487379] (imputed)	N	urate measurement	http://www.ebi.ac.uk/efo/EFO_0004531	GCST90319904	Genome-wide genotyping array
	2024-03-28	37500982	He D	2023-07-27	Osteoporos Int	www.ncbi.nlm.nih.gov/pubmed/37500982	A longitudinal genome-wide association study of bone mineral density mean and variability in the UK Biobank.	Bone mineral density variability	5,862 South Asian ancestry individuals	NA	2q37.3	2	239310397		HDAC4			ENSG00000068024			rs138578374-?	rs138578374	0	138578374	intron_variant	0	NR	2e-08	7.69897				NR [NR] (imputed)	N	bone density	http://purl.obolibrary.org/obo/OBA_1000110	GCST90321121	Genome-wide genotyping array
	2024-05-16	38689001	Keaton JM	2024-04-30	Nat Genet	www.ncbi.nlm.nih.gov/pubmed/38689001	Genome-wide analysis in over 1 million individuals of European ancestry yields improved polygenic risk scores for blood pressure traits.	Systolic blood pressure	1,028,980 European ancestry individuals	40,204 African ancestry individuals, 21,843 African American individuals	2q37.3	2	239329596		HDAC4			ENSG00000068024			rs68080737-A	rs68080737	0	68080737	intron_variant	0	NR	1e-09	9	(EA)	0.2963	[0.2-0.39] unit increase	NR [7568459] (imputed)	N	systolic blood pressure	http://www.ebi.ac.uk/efo/EFO_0006335	GCST90310294	Genome-wide genotyping array
	2023-12-14	37345113	Verma SS	2023-05-16	Cancers (Basel)	www.ncbi.nlm.nih.gov/pubmed/37345113	Genome-Wide Association Study of Breast Density among Women of African Ancestry.	Breast area percent density	1,333 African American individuals	NA	2q37.3	2	239398011		HDAC4			ENSG00000068024			rs78787474-?	rs78787474	0	78787474	intron_variant	0	NR	1e-06	6				NR [NR]	N	breast density	http://purl.obolibrary.org/obo/OBA_2050351	GCST90293092	Genome-wide genotyping array
	2023-02-09	36224396	Yengo L	2022-10-12	Nature	www.ncbi.nlm.nih.gov/pubmed/36224396	A saturated map of common genetic variants associated with human height.	Height	5,314,291 European ancestry, Hispanic or Latin American, East Asian ancestry, African ancestry, South Asian ancestry individuals	NA	2q37.3	2	239050865		HDAC4			ENSG00000068024			rs13393217-A	rs13393217	0	13393217	3_prime_UTR_variant	0	0.1389	1e-17	17		0.0079	[0.0061-0.0097] unit decrease	Affymetrix, Illumina [1385132] (imputed)	N	body height	http://purl.obolibrary.org/obo/OBA_VT0001253	GCST90245848	Genome-wide genotyping array
	2023-02-09	36224396	Yengo L	2022-10-12	Nature	www.ncbi.nlm.nih.gov/pubmed/36224396	A saturated map of common genetic variants associated with human height.	Height	5,314,291 European ancestry, Hispanic or Latin American, East Asian ancestry, African ancestry, South Asian ancestry individuals	NA	2q37.3	2	239127445		HDAC4			ENSG00000068024			rs3791452-G	rs3791452	0	3791452	intron_variant	0	0.2728	2e-12	11.699		0.0049	[0.0035-0.0063] unit decrease	Affymetrix, Illumina [1385132] (imputed)	N	body height	http://purl.obolibrary.org/obo/OBA_VT0001253	GCST90245848	Genome-wide genotyping array
	2021-12-14	34594039	Sakaue S	2021-09-30	Nat Genet	www.ncbi.nlm.nih.gov/pubmed/34594039	A cross-population atlas of genetic associations for 220 human phenotypes.	Diastolic blood pressure	340,162 European ancestry individuals, 145,515 East Asian ancestry individuals	NA	2q37.3	2	239279750		HDAC4			ENSG00000068024			rs4852042-A	rs4852042	0	4852042	intron_variant	0	NR	1e-08	8		0.0168	[0.011-0.022] unit increase	Affymetrix, Illumina [20537302] (imputed)	N	diastolic blood pressure	http://www.ebi.ac.uk/efo/EFO_0006336	GCST90018952	Genome-wide genotyping array
	2021-12-14	34594039	Sakaue S	2021-09-30	Nat Genet	www.ncbi.nlm.nih.gov/pubmed/34594039	A cross-population atlas of genetic associations for 220 human phenotypes.	Systolic blood pressure	340,159 European ancestry individuals, 145,505 East Asian ancestry individuals	NA	2q37.3	2	239299787		HDAC4			ENSG00000068024			rs13389265-T	rs13389265	0	13389265	intron_variant	0	NR	2e-09	8.69897		0.0161	[0.011-0.021] unit increase	Affymetrix, Illumina [20537302] (imputed)	N	systolic blood pressure	http://www.ebi.ac.uk/efo/EFO_0006335	GCST90018972	Genome-wide genotyping array
	2021-12-14	34594039	Sakaue S	2021-09-30	Nat Genet	www.ncbi.nlm.nih.gov/pubmed/34594039	A cross-population atlas of genetic associations for 220 human phenotypes.	Mean arterial pressure	360,863 European ancestry individuals, 145,502 East Asian ancestry individuals	NA	2q37.3	2	239299787		HDAC4			ENSG00000068024			rs13389265-T	rs13389265	0	13389265	intron_variant	0	NR	7e-11	10.1549		0.0178	[0.013-0.023] unit increase	Affymetrix, Illumina [20537389] (imputed)	N	mean arterial pressure	http://www.ebi.ac.uk/efo/EFO_0006340	GCST90018963	Genome-wide genotyping array
	2019-08-12	27903959	Lv H	2017-01-31	Oncotarget	www.ncbi.nlm.nih.gov/pubmed/27903959	Genome-wide haplotype association study identify the FGFR2 gene as a risk gene for acute myeloid leukemia.	Core binding factor acute myeloid leukemia	175 European ancestry cases, 218 European ancestry controls	NA	2q37.3	2;2	239074483;239062482	NR	HDAC4; HDAC4						rs9308908-C; rs2100172-T	rs9308908; rs2100172	0		intron_variant; intron_variant		0.278	2e-13	12.699				Affymetrix [734624]	N	acute myeloid leukemia	http://www.ebi.ac.uk/efo/EFO_0000222	GCST008413	Genome-wide genotyping array
	2019-08-12	27903959	Lv H	2017-01-31	Oncotarget	www.ncbi.nlm.nih.gov/pubmed/27903959	Genome-wide haplotype association study identify the FGFR2 gene as a risk gene for acute myeloid leukemia.	Core binding factor acute myeloid leukemia	175 European ancestry cases, 218 European ancestry controls	NA	2q37.3	2;2	239074483;239062482	NR	HDAC4; HDAC4						rs9308908-T; rs2100172-T	rs9308908; rs2100172	0		intron_variant; intron_variant		0.563	3e-07	6.52288				Affymetrix [734624]	N	acute myeloid leukemia	http://www.ebi.ac.uk/efo/EFO_0000222	GCST008413	Genome-wide genotyping array
	2019-02-08	30595370	Kichaev G	2018-12-27	Am J Hum Genet	www.ncbi.nlm.nih.gov/pubmed/30595370	Leveraging Polygenic Functional Enrichment to Improve GWAS Power.	Heel bone mineral density	approximately 446,000 European ancestry individuals	NA	2q37.3	2	239028457		LINC01940 - HDAC4	ENSG00000227744	ENSG00000068024		102188	19711	rs62189261-?	rs62189261	0	62189261	intergenic_variant	1	NR	2e-09	8.69897				NR [~ 8900000] (imputed)	N	heel bone mineral density	http://www.ebi.ac.uk/efo/EFO_0009270	GCST007066	Genome-wide genotyping array
	2017-06-27	28090653	Liu Y	2017-01-16	Clin Pharmacol Ther	www.ncbi.nlm.nih.gov/pubmed/28090653	Genome-Wide Study Links PNPLA3 Variant With Elevated Hepatic Transaminase After Acute Lymphoblastic Leukemia Therapy.	Alanine aminotransferase (ALT) levels after remission induction therapy in actute lymphoblastic leukemia (ALL)	up to 488 European ancestry cases, up to 111 African American cases, up to 60 Hispanic cases, up to 56 other ancestry cases	NA	2q37.3	2	239001819	HDAC4	LINC01940 - HDAC4	ENSG00000227744	ENSG00000068024		75550	46349	rs3935695-C	rs3935695	0	3935695	intergenic_variant	1	NR	7e-06	5.1549	(EA)	1.27	[1.02-1.59]	Affymetrix, Illumina [NR] (imputed)	N	serum alanine aminotransferase measurement, response to combination chemotherapy	http://www.ebi.ac.uk/efo/EFO_0004735, http://www.ebi.ac.uk/efo/EFO_0007965	GCST004250	Genome-wide genotyping array
	2019-02-06	30595370	Kichaev G	2018-12-27	Am J Hum Genet	www.ncbi.nlm.nih.gov/pubmed/30595370	Leveraging Polygenic Functional Enrichment to Improve GWAS Power.	Balding type 1	approximately 208,000 European ancestry individuals	NA	2q37.3	2	239027985		LINC01940 - HDAC4	ENSG00000227744	ENSG00000068024		101716	20183	rs4075018-?	rs4075018	0	4075018	intergenic_variant	1	NR	6e-12	11.2218				NR [~ 8900000] (imputed)	N	balding measurement	http://www.ebi.ac.uk/efo/EFO_0007825	GCST007038	Genome-wide genotyping array
	2019-02-01	30573740	Yap CX	2018-12-20	Nat Commun	www.ncbi.nlm.nih.gov/pubmed/30573740	Dissection of genetic variation and evidence for pleiotropy in male pattern baldness.	Male-pattern baldness	205,327 European ancestry males	NA	2q37.3	2	239027985	NR	LINC01940 - HDAC4	ENSG00000227744	ENSG00000068024		101716	20183	rs4075018-A	rs4075018	0	4075018	intergenic_variant	1	0.205144	3e-25	24.5229		0.0391919	[0.032-0.047] unit increase	NR [19129689] (imputed)	N	balding measurement	http://www.ebi.ac.uk/efo/EFO_0007825	GCST007020	Genome-wide genotyping array
	2019-02-08	30595370	Kichaev G	2018-12-27	Am J Hum Genet	www.ncbi.nlm.nih.gov/pubmed/30595370	Leveraging Polygenic Functional Enrichment to Improve GWAS Power.	Lung function (FEV1/FVC)	approximately 370,000 European ancestry individuals	NA	2q37.3	2	238959613		LINC01940 - HDAC4	ENSG00000227744	ENSG00000068024		33344	88555	rs4308141-?	rs4308141	0	4308141	intergenic_variant	1	NR	2e-82	81.699				NR [~ 8900000] (imputed)	N	FEV/FVC ratio	http://www.ebi.ac.uk/efo/EFO_0004713	GCST007080	Genome-wide genotyping array
	2019-02-08	30595370	Kichaev G	2018-12-27	Am J Hum Genet	www.ncbi.nlm.nih.gov/pubmed/30595370	Leveraging Polygenic Functional Enrichment to Improve GWAS Power.	Hair color	approximately 452,000 European ancestry individuals	NA	2q37.3	2	239028127		LINC01940 - HDAC4	ENSG00000227744	ENSG00000068024		101858	20041	rs12185725-?	rs12185725	0	12185725	intergenic_variant	1	NR	1e-10	10				NR [~ 8900000] (imputed)	N	strand of hair color	http://purl.obolibrary.org/obo/OBA_0002313	GCST007082	Genome-wide genotyping array
	2013-02-27	23284291	Hancock DB	2012-12-20	PLoS Genet	www.ncbi.nlm.nih.gov/pubmed/23284291	Genome-wide joint meta-analysis of SNP and SNP-by-smoking interaction identifies novel loci for pulmonary function.	Pulmonary function (smoking interaction)	50,047 European ancestry individuals	NA	2q37.3	2	238955452	HDAC4	LINC01940 - HDAC4	ENSG00000227744	ENSG00000068024		29183	92716	rs12477314-?	rs12477314	0	12477314	regulatory_region_variant	1	NR	2e-07	6.69897	(FEV1/FVC, Pack-years)			NR [~ 2500000] (imputed)	N	FEV/FVC ratio, pulmonary function measurement, smoking behavior trait	http://www.ebi.ac.uk/efo/EFO_0004713, http://www.ebi.ac.uk/efo/EFO_0003892, http://purl.obolibrary.org/obo/OBA_2050116	GCST001784	Genome-wide genotyping array
	2011-10-16	21946350	Soler Artigas M	2011-09-25	Nat Genet	www.ncbi.nlm.nih.gov/pubmed/21946350	Genome-wide association and large-scale follow up identifies 16 new loci influencing lung function.	Pulmonary function	48,201 European ancestry individuals	46,411 European ancestry individuals	2q37.3	2	238955452	HDAC4	LINC01940 - HDAC4	ENSG00000227744	ENSG00000068024		29183	92716	rs12477314-T	rs12477314	0	12477314	regulatory_region_variant	1	0.2	2e-12	11.699	(FEV1/FVC)	0.041	[0.029-0.053] unit increase	Affymetrix, Illumina [~ 2500000] (imputed)	N	FEV/FVC ratio, pulmonary function measurement	http://www.ebi.ac.uk/efo/EFO_0004713, http://www.ebi.ac.uk/efo/EFO_0003892	GCST001248	Genome-wide genotyping array
	2011-10-18	21946350	Soler Artigas M	2011-09-25	Nat Genet	www.ncbi.nlm.nih.gov/pubmed/21946350	Genome-wide association and large-scale follow up identifies 16 new loci influencing lung function.	Pulmonary function	48,201 European ancestry individuals	46,411 European ancestry individuals	2q37.3	2	238955452	HDAC4	LINC01940 - HDAC4	ENSG00000227744	ENSG00000068024		29183	92716	rs12477314-T	rs12477314	0	12477314	regulatory_region_variant	1	0.2	1e-07	7	(FEV1)	0.028	[0.018-0.038] unit increase	Affymetrix, Illumina [~ 2500000] (imputed)	N	pulmonary function measurement, forced expiratory volume	http://www.ebi.ac.uk/efo/EFO_0003892, http://www.ebi.ac.uk/efo/EFO_0004314	GCST001251	Genome-wide genotyping array
	2016-06-13	26365420	Mbarek H	2015-09-14	Am J Med Genet B Neuropsychiatr Genet	www.ncbi.nlm.nih.gov/pubmed/26365420	The genetics of alcohol dependence: Twin and SNP-based heritability, and genome-wide association study based on AUDIT scores.	Alcohol dependence	1,374 European ancestry cases and 6,468 European ancestry controls from 7,694 twin pairs	NA	2q37.3	2	238936057	FLJ43879	LINC01940 - HDAC4	ENSG00000227744	ENSG00000068024		9788	112111	rs62191099-A	rs62191099	0	62191099	intergenic_variant	1	0.3	5e-06	5.30103		1.25	[1.17-1.33]	Affymetrix, Illumina, Perlegen [6464174] (imputed)	N	alcohol dependence	http://purl.obolibrary.org/obo/MONDO_0007079	GCST003121	Genome-wide genotyping array
	2019-01-30	30531825	Morgan MD	2018-12-10	Nat Commun	www.ncbi.nlm.nih.gov/pubmed/30531825	Genome-wide study of hair colour in UK Biobank explains most of the SNP heritability.	Blond vs. brown/black hair color	39,397 British ancestry blond hair individuals, 283,920 British ancestry brown or black hair individuals	NA	2q37.3	2	239028127	HDAC4	LINC01940 - HDAC4	ENSG00000227744	ENSG00000068024		101858	20041	rs12185725-G	rs12185725	0	12185725	intergenic_variant	1	0.1947	2e-11	10.699		1.068	NR	Affymetrix [9154080] (imputed)	N	hair color	http://www.ebi.ac.uk/efo/EFO_0003924	GCST006988	Genome-wide genotyping array
	2019-01-28	30598549	Morris JA	2018-12-31	Nat Genet	www.ncbi.nlm.nih.gov/pubmed/30598549	An atlas of genetic influences on osteoporosis in humans and mice.	Heel bone mineral density	426,824 British ancestry individuals	NA	2q37.3	2	239027985	HDAC4	LINC01940 - HDAC4	ENSG00000227744	ENSG00000068024		101716	20183	rs4075018-G	rs4075018	0	4075018	intergenic_variant	1	0.79404	6e-10	9.22185		0.0140015	[0.0096-0.0184] unit decrease	NR [13737936] (imputed)	N	heel bone mineral density	http://www.ebi.ac.uk/efo/EFO_0009270	GCST006979	Genome-wide genotyping array
	2024-12-04	39537608	Koskeridis F	2024-11-13	Nat Commun	www.ncbi.nlm.nih.gov/pubmed/39537608	Multi-trait association analysis reveals shared genetic loci between Alzheimer's disease and cardiovascular traits.	Diastolic blood pressure (MTAG)	at least 757,601 European ancestry individuals (MTAG boosted by 455,258 Alzheimer's disease samples)	NA	2q37.3	2	238943036		LINC01940 - HDAC4	ENSG00000227744	ENSG00000068024		16767	105132	rs4507125-C	rs4507125	0	4507125	regulatory_region_variant	1	NR	2e-08	7.69897		0.0115572	[0.0075-0.0156] unit increase	NR [5753795] (imputed)	N	diastolic blood pressure	http://www.ebi.ac.uk/efo/EFO_0006336	GCST90449057	Genome-wide genotyping array
	2024-10-17	38102678	Jiang M	2023-12-15	Respir Res	www.ncbi.nlm.nih.gov/pubmed/38102678	Genetic and observational associations of lung function with gastrointestinal tract diseases: pleiotropic and mendelian randomization analysis.	FEV1 or peptic ulcer disease (pleiotropy)	400,102 European ancestry individuals with FEV1 measurement, 24,906 European ancestry PUD cases, 731,917 European ancestry PUD controls	NA	2q37.3	2	238947706		LINC01940 - HDAC4	ENSG00000227744	ENSG00000068024		21437	100462	rs12999257-?	rs12999257	0	12999257	intergenic_variant	1	NR	3e-12	11.5229				NR [NR]	N	peptic ulcer disease, forced expiratory volume	http://purl.obolibrary.org/obo/MONDO_0004247, http://www.ebi.ac.uk/efo/EFO_0004314	GCST90454171	Genome-wide genotyping array
	2021-04-23	33106845	Kim W	2020-10-27	Am J Epidemiol	www.ncbi.nlm.nih.gov/pubmed/33106845	Genome-wide Gene-by-smoking Interaction Study of Chronic Obstructive Pulmonary Disease.	Chronic obstructive pulmonary disease x current smoker interaction (2df)	21,077 European ancestry cases, 179,689 European ancestry controls	NA	2q37.3	2	238951008	NR	LINC01940 - HDAC4	ENSG00000227744	ENSG00000068024		24739	97160	rs62191105-T	rs62191105	0	62191105	intergenic_variant	1	0.19	3e-09	8.52288			[NR]	Affymetrix [9886854] (imputed)	N	smoking status measurement, chronic obstructive pulmonary disease	http://www.ebi.ac.uk/efo/EFO_0006527, http://www.ebi.ac.uk/efo/EFO_0000341	GCST90016590	Genome-wide genotyping array
	2021-04-23	33106845	Kim W	2020-10-27	Am J Epidemiol	www.ncbi.nlm.nih.gov/pubmed/33106845	Genome-wide Gene-by-smoking Interaction Study of Chronic Obstructive Pulmonary Disease.	Chronic obstructive pulmonary disease x current smoker interaction (main effect)	21,077 European ancestry cases, 179,689 European ancestry controls	NA	2q37.3	2	238951008	NR	LINC01940 - HDAC4	ENSG00000227744	ENSG00000068024		24739	97160	rs62191105-T	rs62191105	0	62191105	intergenic_variant	1	0.19	9e-10	9.04576		0.91	[0.88-0.94]	Affymetrix [9886854] (imputed)	N	chronic obstructive pulmonary disease	http://www.ebi.ac.uk/efo/EFO_0000341	GCST90016591	Genome-wide genotyping array
	2021-04-23	33106845	Kim W	2020-10-27	Am J Epidemiol	www.ncbi.nlm.nih.gov/pubmed/33106845	Genome-wide Gene-by-smoking Interaction Study of Chronic Obstructive Pulmonary Disease.	Chronic obstructive pulmonary disease in non-current smokers	16,488 European ancestry cases, 169,688 European ancestry controls	NA	2q37.3	2	238951008	NR	LINC01940 - HDAC4	ENSG00000227744	ENSG00000068024		24739	97160	rs62191105-T	rs62191105	0	62191105	intergenic_variant	1	0.19	1e-09	9		0.91	[0.88-0.94]	Affymetrix [9886854] (imputed)	N	chronic obstructive pulmonary disease	http://www.ebi.ac.uk/efo/EFO_0000341	GCST90016594	Genome-wide genotyping array
	2021-04-23	33106845	Kim W	2020-10-27	Am J Epidemiol	www.ncbi.nlm.nih.gov/pubmed/33106845	Genome-wide Gene-by-smoking Interaction Study of Chronic Obstructive Pulmonary Disease.	Chronic obstructive pulmonary disease x ever smoker interaction (2df)	21,077 European ancestry cases, 179,689 European ancestry controls	NA	2q37.3	2	238972087	NR	LINC01940 - HDAC4	ENSG00000227744	ENSG00000068024		45818	76081	rs35945722-A	rs35945722	0	35945722	intergenic_variant	1	0.18	5e-09	8.30103			[NR]	Affymetrix [9886854] (imputed)	N	smoking status measurement, chronic obstructive pulmonary disease	http://www.ebi.ac.uk/efo/EFO_0006527, http://www.ebi.ac.uk/efo/EFO_0000341	GCST90016585	Genome-wide genotyping array
	2021-04-23	33106845	Kim W	2020-10-27	Am J Epidemiol	www.ncbi.nlm.nih.gov/pubmed/33106845	Genome-wide Gene-by-smoking Interaction Study of Chronic Obstructive Pulmonary Disease.	Chronic obstructive pulmonary disease in ever smokers	12,446 European ancestry cases, 59,145 European ancestry controls	NA	2q37.3	2	238972087	NR	LINC01940 - HDAC4	ENSG00000227744	ENSG00000068024		45818	76081	rs35945722-A	rs35945722	0	35945722	intergenic_variant	1	0.18	7e-07	6.1549		0.91	[0.87-0.94]	Affymetrix [9886854] (imputed)	N	chronic obstructive pulmonary disease	http://www.ebi.ac.uk/efo/EFO_0000341	GCST90016588	Genome-wide genotyping array
	2018-11-26	30275531	Klarin D	2018-10-01	Nat Genet	www.ncbi.nlm.nih.gov/pubmed/30275531	Genetics of blood lipids among ~300,000 multi-ethnic participants of the Million Veteran Program.	Triglycerides	215,551 European ancestry individuals, 57,332 African American individuals, 24,743 Hispanic individuals	Up to 319,677 individuals	2q37.3	2	238975165	intergenic	LINC01940 - HDAC4	ENSG00000227744	ENSG00000068024		48896	73003	rs10199914-A	rs10199914	0	10199914	intergenic_variant	1	0.6285	4e-09	8.39794		0.0112	[0.0075-0.0149] mg‚Äâdl-1 decrease	Affymetrix [up to 31400000] (imputed)	N	triglyceride measurement	http://www.ebi.ac.uk/efo/EFO_0004530	GCST006613	Genome-wide genotyping array
Yes	2021-04-29	33462485	Kurilshikov A	2021-01-18	Nat Genet	www.ncbi.nlm.nih.gov/pubmed/33462485	Large-scale association analyses identify host factors influencing human gut microbiome composition.	Gut microbiota alpha diversity (Simpson index)	14,306 European ancestry individuals, 811 Korean ancestry individuals, 1,097 Hispanic individuals, 114 African American individuals, 481 Middle Eastern ancestry individuals, 1,531 unknown and other admixed ancestry individuals	NA	2q37.3	2	238943359		LINC01940 - HDAC4	ENSG00000227744	ENSG00000068024		17090	104809	rs4511740-G	rs4511740	0	4511740	intergenic_variant	1	NR	3e-06	5.52288		4.64802	z score decrease	Affymetrix, Illumina [NR] (imputed)	N	gut microbiome measurement	http://www.ebi.ac.uk/efo/EFO_0007874	GCST90017132	Genome-wide genotyping array
	2018-11-29	30224653	Evangelou E	2018-09-17	Nat Genet	www.ncbi.nlm.nih.gov/pubmed/30224653	Genetic analysis of over 1 million people identifies 535 new loci associated with blood pressure traits.	Diastolic blood pressure	757,601 European ancestry individuals	NA	2q37.3	2	238943036	HDAC4	LINC01940 - HDAC4	ENSG00000227744	ENSG00000068024		16767	105132	rs4507125-A	rs4507125	0	4507125	regulatory_region_variant	1	0.7864	4e-09	8.39794		0.1244	[0.083-0.166] mmHg decrease	Affymetrix, Illumina [~ 7100000] (imputed)	N	diastolic blood pressure	http://www.ebi.ac.uk/efo/EFO_0006336	GCST006627	Genome-wide genotyping array
	2020-09-17	32634583	Meng Y	2020-07-04	Int J Infect Dis	www.ncbi.nlm.nih.gov/pubmed/32634583	Genome-wide association study identifies TPH2 variant as a novel locus for severe CV-A6-associated hand, foot, and mouth disease in Han Chinese.	CV-A6-associated hand, foot, and mouth disease (severe vs mild)	115 Han Chinese ancestry severe cases, 115 Han Chinese ancestry mild controls	NA	2q37.3	2	238956383	FLJ43879, HDAC4	LINC01940 - HDAC4	ENSG00000227744	ENSG00000068024		30114	91785	rs4073751-?	rs4073751	0	4073751	intergenic_variant	1	NR	5e-06	5.30103				Illumina [NR]	N	hand, foot and mouth disease, illness severity status	http://www.ebi.ac.uk/efo/EFO_0007294, http://www.ebi.ac.uk/efo/EFO_0007863	GCST010578	Genome-wide genotyping array
	2019-03-27	30804560	Shrine N	2019-02-25	Nat Genet	www.ncbi.nlm.nih.gov/pubmed/30804560	New genetic signals for lung function highlight pathways and chronic obstructive pulmonary disease associations across multiple ancestries.	Lung function (FEV1/FVC)	321,047 European ancestry individuals	79,005 European ancestry individuals	2q37.3	2	238959613	FLJ43879	LINC01940 - HDAC4	ENSG00000227744	ENSG00000068024		33344	88555	rs4308141-C	rs4308141	0	4308141	intergenic_variant	1	0.8011	4e-59	58.3979		0.0484	[0.043-0.054] unit decrease	Affymetrix [19819130] (imputed)	N	FEV/FVC ratio	http://www.ebi.ac.uk/efo/EFO_0004713	GCST007431	Genome-wide genotyping array
	2022-11-22	35022708	Choquet H	2022-01-12	Hum Mol Genet	www.ncbi.nlm.nih.gov/pubmed/35022708	Ancestry- and sex-specific effects underlying inguinal hernia susceptibility identified in a multiethnic genome-wide association study meta-analysis.	Inguinal hernia	32,089 European, African, Asian, Hispanic/Latin American or mixed ancestry male cases, 196,784 European, African, Asian, Hispanic/Latin American or mixed ancestry male controls	NA	2q37.3	2	239015761		LINC01940 - HDAC4	ENSG00000227744	ENSG00000068024		89492	32407	rs80225179-C	rs80225179	0	80225179	intergenic_variant	1	NR	4e-08	7.39794		1.1051		Affymetrix [NR] (imputed)	N	Inguinal hernia	http://purl.obolibrary.org/obo/HP_0000023	GCST90239727	Genome-wide genotyping array
	2022-12-02	34989438	Zhu X	2022-01-06	Genet Epidemiol	www.ncbi.nlm.nih.gov/pubmed/34989438	Genome-wide pleiotropy analysis identifies novel blood pressure variants and improves its polygenic risk scores.	Blood pressure (pleiotropy model 1 DBP adjusted for estimated causal effects x SBP)	757,601 European ancestry individuals, 318,891 European ancestry, African American or Afro-Caribbean, Native American ancestry, Asian ancestry individuals	NA	2q37.3	2	238926662		LINC01940 - HDAC4	ENSG00000227744	ENSG00000068024		393	121506	rs11903560-?	rs11903560	0	11903560	intergenic_variant	1	NR	5e-07	6.30103		0.0837044	[0.031-0.136] unit increase	NR [7100000] (imputed)	N	diastolic blood pressure, systolic blood pressure	http://www.ebi.ac.uk/efo/EFO_0006336, http://www.ebi.ac.uk/efo/EFO_0006335	GCST90239828	Genome-wide genotyping array
	2023-05-04	37069358	Cosentino J	2023-04-17	Nat Genet	www.ncbi.nlm.nih.gov/pubmed/37069358	Inference of chronic obstructive pulmonary disease with deep learning on raw spirograms identifies new genetic loci and improves risk models.	Chronic obstructive pulmonary disease liability (machine learning-based score)	325,027 European ancestry individuals	NA	2q37.3	2	238954831		LINC01940 - HDAC4	ENSG00000227744	ENSG00000068024		28562	93337	rs62191107-T	rs62191107	0	62191107	intergenic_variant	1	NR	1e-55	55		0.0415863	[0.036-0.047] unit increase	Affymetrix [13285083] (imputed)	N	chronic obstructive pulmonary disease	http://www.ebi.ac.uk/efo/EFO_0000341	GCST90244098	Genome-wide genotyping array
	2023-01-09	35224516	Thibord F	2022-02-22	HGG Adv	www.ncbi.nlm.nih.gov/pubmed/35224516	A year of COVID-19 GWAS results from the GRASP portal reveals potential genetic risk factors.	COVID-19 (severe vs tested, not severe)	733 European ancestry male cases, 36,466 European ancestry male controls, 72 male cases, 2,465 male controls	NA	2q37.3	2	239015648		LINC01940 - HDAC4	ENSG00000227744	ENSG00000068024		89379	32520	rs56238174-G	rs56238174	0	56238174	intergenic_variant	1	0.126915	6e-06	5.22185		0.34981	[0.2-0.5] unit increase	NR [9857703] (imputed)	N	COVID-19	http://purl.obolibrary.org/obo/MONDO_0100096	GCST90104763	Genome-wide genotyping array
	2023-01-09	35224516	Thibord F	2022-02-22	HGG Adv	www.ncbi.nlm.nih.gov/pubmed/35224516	A year of COVID-19 GWAS results from the GRASP portal reveals potential genetic risk factors.	COVID-19 (severe vs population)	733 European ancestry male cases, 209,218 European ancestry male controls, 72 male cases, 13,068 male controls	NA	2q37.3	2	239015648		LINC01940 - HDAC4	ENSG00000227744	ENSG00000068024		89379	32520	rs56238174-G	rs56238174	0	56238174	intergenic_variant	1	0.126747	5e-06	5.30103		0.35075	[0.2-0.5] unit increase	NR [9846957] (imputed)	N	COVID-19	http://purl.obolibrary.org/obo/MONDO_0100096	GCST90104757	Genome-wide genotyping array
	2018-12-03	28196072	Hagenaars SP	2017-02-14	PLoS Genet	www.ncbi.nlm.nih.gov/pubmed/28196072	Genetic prediction of male pattern baldness.	Male-pattern baldness	52,874 British ancestry males		2q37.3	2	239028127	NR	LINC01940 - HDAC4	ENSG00000227744	ENSG00000068024		101858	20041	rs12185725-G	rs12185725	0	12185725	intergenic_variant	1	NR	1e-10	10		0.0507895	NR unit increase	NR [NR] (imputed)	N	alopecia	http://purl.obolibrary.org/obo/MONDO_0004907	GCST006661	Genome-wide genotyping array
	2019-05-01	30804561	Sakornsakolpat P	2019-02-25	Nat Genet	www.ncbi.nlm.nih.gov/pubmed/30804561	Genetic landscape of chronic obstructive pulmonary disease identifies heterogeneous cell-type and phenotype associations.	Chronic obstructive pulmonary disease	35,735 cases, 222,076 controls	NA	2q37.3	2	238951008	TWIST2	LINC01940 - HDAC4	ENSG00000227744	ENSG00000068024		24739	97160	rs62191105-C	rs62191105	0	62191105	intergenic_variant	1	0.8	3e-12	11.5229		1.09	[1.07-1.12]	Affymetrix, Illumina [6224355] (imputed)	N	chronic obstructive pulmonary disease	http://www.ebi.ac.uk/efo/EFO_0000341	GCST007692	Genome-wide genotyping array
	2019-03-27	30804560	Shrine N	2019-02-25	Nat Genet	www.ncbi.nlm.nih.gov/pubmed/30804560	New genetic signals for lung function highlight pathways and chronic obstructive pulmonary disease associations across multiple ancestries.	FEV1	321,047 European ancestry individuals	79,005 European ancestry individuals	2q37.3	2	238959613	FLJ43879	LINC01940 - HDAC4	ENSG00000227744	ENSG00000068024		33344	88555	rs4308141-C	rs4308141	0	4308141	intergenic_variant	1	0.8011	3e-22	21.5229		0.0284	[0.023-0.034] unit decrease	Affymetrix [19819130] (imputed)	N	forced expiratory volume	http://www.ebi.ac.uk/efo/EFO_0004314	GCST007432	Genome-wide genotyping array
	2019-03-27	30804560	Shrine N	2019-02-25	Nat Genet	www.ncbi.nlm.nih.gov/pubmed/30804560	New genetic signals for lung function highlight pathways and chronic obstructive pulmonary disease associations across multiple ancestries.	Peak expiratory flow	321,047 European ancestry individuals	24,218 European ancestry individuals	2q37.3	2	238959613	FLJ43879	LINC01940 - HDAC4	ENSG00000227744	ENSG00000068024		33344	88555	rs4308141-C	rs4308141	0	4308141	intergenic_variant	1	0.8011	6e-11	10.2218		0.0206	[0.014-0.027] unit decrease	Affymetrix [19819130] (imputed)	N	peak expiratory flow	http://www.ebi.ac.uk/efo/EFO_0009718	GCST007430	Genome-wide genotyping array
	2022-09-01	31882771	Al-Khelaifi F	2019-12-27	Sci Rep	www.ncbi.nlm.nih.gov/pubmed/31882771	Metabolic GWAS of elite athletes reveals novel genetically-influenced metabolites associated with athletic performance.	N-acetyl-beta-alanine levels in elite athletes	490 individuals	NA	2q37.3	2	239401967		HDAC4-AS1			ENSG00000222020			rs1709851-?	rs1709851	0	1709851	regulatory_region_variant	0	NR	1e-06	6		0.32065	[0.19-0.45] unit increase	Illumina [275016]	N	N-acetyl-beta-alanine measurement	http://www.ebi.ac.uk/efo/EFO_0021430	GCST90134018	Genome-wide genotyping array
	2022-07-01	35361970	Okbay A	2022-03-31	Nat Genet	www.ncbi.nlm.nih.gov/pubmed/35361970	Polygenic prediction of educational attainment within and between families from genome-wide association analyses in 3 million individuals.	Educational attainment	3,037,499 European ancestry individuals	NA	2q37.3	2	239043748		LINC01940 - HDAC4	ENSG00000227744	ENSG00000068024		117479	4420	rs79747966-T	rs79747966	0	79747966	intergenic_variant	1	0.1521	2e-09	8.69897		0.00881843	[0.006-0.0117] unit decrease	Illumina [10675380] (imputed)	N	educational attainment	http://www.ebi.ac.uk/efo/EFO_0011015	GCST90105038	Genome-wide genotyping array
	2022-07-01	35361970	Okbay A	2022-03-31	Nat Genet	www.ncbi.nlm.nih.gov/pubmed/35361970	Polygenic prediction of educational attainment within and between families from genome-wide association analyses in 3 million individuals.	Educational attainment	3,037,499 European ancestry individuals	NA	2q37.3	2	239402622		HDAC4-AS1			ENSG00000222020			rs2931203-A	rs2931203	0	2931203	intergenic_variant	0	0.7566	5e-14	13.301		0.00918581	[0.0068-0.0116] unit decrease	Illumina [10675380] (imputed)	N	educational attainment	http://www.ebi.ac.uk/efo/EFO_0011015	GCST90105038	Genome-wide genotyping array
	2023-12-12	36914875	Shrine N	2023-03-13	Nat Genet	www.ncbi.nlm.nih.gov/pubmed/36914875	Multi-ancestry genome-wide association analyses improve resolution of genes and pathways influencing lung function and chronic obstructive pulmonary disease risk.	Lung function (FEV1/FVC)	475,645 European ancestry individuals, 8,590 African ancestry individuals, 85,279 East Asian ancestry individuals, 4,270 South Asian ancestry individuals, 14,668 Hispanic or Latin American individuals	NA	2q37.3	2	238956042		LINC01940 - HDAC4	ENSG00000227744	ENSG00000068024		29773	92126	rs4591362-A	rs4591362	0	4591362	intergenic_variant	1	0.205	3e-75	74.5229		18.36	z score increase	Affymetrix, Illumina [63372103] (imputed)	N	FEV/FVC ratio	http://www.ebi.ac.uk/efo/EFO_0004713	GCST90244094	Genome-wide genotyping array
	2025-01-10	38374256	Suzuki K	2024-02-19	Nature	www.ncbi.nlm.nih.gov/pubmed/38374256	Genetic drivers of heterogeneity in type 2 diabetes pathophysiology.	Type 2 diabetes	50,251 African American cases, 103,909 African American controls, 88,109 East Asian ancestry cases, 339,395 East Asian ancestry controls, 242,283 European ancestry cases, 1,569,734 European ancestry controls, 29,375 Hispanic cases, 59,368 Hispanic controls, 1,602 South African ancestry cases, 976 South African ancestry controls, 16,832 South Asian ancestry cases, 33,767 South Asian ancestry contr…	NA	2q37.3	2	238947706		LINC01940 - HDAC4	ENSG00000227744	ENSG00000068024		21437	100462	rs12999257-G	rs12999257	0	12999257	intergenic_variant	1	0.7238	1e-08	8				Affymetrix, Illumina [NR] (imputed)	N	type 2 diabetes mellitus	http://purl.obolibrary.org/obo/MONDO_0005148	GCST90492734	Genome-wide genotyping array
	2024-09-25	39256582	Loeb GB	2024-09-10	Nat Genet	www.ncbi.nlm.nih.gov/pubmed/39256582	Variants in tubule epithelial regulatory elements mediate most heritable differences in human kidney function.	Estimated glomerular filtration rate (cystatin c)	406,504 European ancestry individuals	NA	2q37.3	2	238949712		LINC01940 - HDAC4	ENSG00000227744	ENSG00000068024		23443	98456	rs4073004-A	rs4073004	0	4073004	intergenic_variant	1	NR	1e-08	8		0.0148414	unit increase	Affymetrix [16984619] (imputed)	N	glomerular filtration rate	http://purl.obolibrary.org/obo/OBA_0003747	GCST90428448	Genome-wide genotyping array
	2024-05-16	38689001	Keaton JM	2024-04-30	Nat Genet	www.ncbi.nlm.nih.gov/pubmed/38689001	Genome-wide analysis in over 1 million individuals of European ancestry yields improved polygenic risk scores for blood pressure traits.	Diastolic blood pressure	1,028,980 European ancestry individuals	62,047 African ancestry individuals, 21,843 African American individuals	2q37.3	2	238943036		LINC01940 - HDAC4	ENSG00000227744	ENSG00000068024		16767	105132	rs4507125-C	rs4507125	0	4507125	regulatory_region_variant	1	NR	2e-09	8.69897	(EA)	0.1094	[0.074-0.145] unit increase	NR [7582263] (imputed)	N	diastolic blood pressure	http://www.ebi.ac.uk/efo/EFO_0006336	GCST90310295	Genome-wide genotyping array
	2024-09-25	39256582	Loeb GB	2024-09-10	Nat Genet	www.ncbi.nlm.nih.gov/pubmed/39256582	Variants in tubule epithelial regulatory elements mediate most heritable differences in human kidney function.	Estimated glomerular filtration rate (creatinine, cystatin c)	406,504 European ancestry individuals	NA	2q37.3	2	238949712		LINC01940 - HDAC4	ENSG00000227744	ENSG00000068024		23443	98456	rs4073004-A	rs4073004	0	4073004	intergenic_variant	1	NR	3e-08	7.52288		0.014428	[0.0093-0.0195] unit increase	Affymetrix [16984552] (imputed)	N	glomerular filtration rate	http://purl.obolibrary.org/obo/OBA_0003747	GCST90428446	Genome-wide genotyping array
	2022-02-24	35115689	Qin Y	2022-02-03	Nat Genet	www.ncbi.nlm.nih.gov/pubmed/35115689	Combined effects of host genetics and diet on human gut microbiota and incident disease in a single population cohort.	CAG-826 abundance in stool	5,959 Finnish ancestry individuals	NA	2q37.3	2	239028045		LINC01940 - HDAC4	ENSG00000227744	ENSG00000068024		101776	20123	rs150471162-T	rs150471162	0	150471162	intergenic_variant	1	0.0101334	2e-09	8.69897		0.231396	[0.16-0.31] unit increase	Illumina [7980478] (imputed)	N	gut microbiome measurement	http://www.ebi.ac.uk/efo/EFO_0007874	GCST90032301	Genome-wide genotyping array
	2023-09-21	33230300	Surendran P	2020-11-23	Nat Genet	www.ncbi.nlm.nih.gov/pubmed/33230300	Discovery of rare variants associated with blood pressure regulation through meta-analysis of 1.3 million individuals.	Diastolic blood pressure	1,164,961 European ancestry individuals	NA	2q37.3	2	238955452		LINC01940 - HDAC4	ENSG00000227744	ENSG00000068024		29183	92716	rs12477314-T	rs12477314	0	12477314	regulatory_region_variant	1	0.2014	2e-09	8.69897		0.104918	[0.071-0.139] mmHg increase	Affymetrix, Illumina [1160000] (imputed)	N	diastolic blood pressure	http://www.ebi.ac.uk/efo/EFO_0006336	GCST90292474	Genome-wide genotyping array, Exome genotyping array
	2023-09-21	33230300	Surendran P	2020-11-23	Nat Genet	www.ncbi.nlm.nih.gov/pubmed/33230300	Discovery of rare variants associated with blood pressure regulation through meta-analysis of 1.3 million individuals.	Diastolic blood pressure	810,865 European ancestry individuals	NA	2q37.3	2	238955452		LINC01940 - HDAC4	ENSG00000227744	ENSG00000068024		29183	92716	rs12477314-T	rs12477314	0	12477314	regulatory_region_variant	1	0.2005	4e-09	8.39794		0.120556	[0.081-0.16] mmHg increase	Affymetrix, Illumina [242866] (imputed)	N	diastolic blood pressure	http://www.ebi.ac.uk/efo/EFO_0006336	GCST90000059	Exome genotyping array
	2022-12-02	34989438	Zhu X	2022-01-06	Genet Epidemiol	www.ncbi.nlm.nih.gov/pubmed/34989438	Genome-wide pleiotropy analysis identifies novel blood pressure variants and improves its polygenic risk scores.	Blood pressure (pleiotropy model 2 SBP adjusted for estimated causal effects x DBP)	757,601 European ancestry individuals, 318,891 European ancestry, African American or Afro-Caribbean, Native American ancestry, Asian ancestry individuals	NA	2q37.3	2	238926662		LINC01940 - HDAC4	ENSG00000227744	ENSG00000068024		393	121506	rs11903560-?	rs11903560	0	11903560	intergenic_variant	1	NR	3e-08	7.52288		0.127387	[0.057-0.198] unit decrease	NR [7100000] (imputed)	N	diastolic blood pressure, systolic blood pressure	http://www.ebi.ac.uk/efo/EFO_0006336, http://www.ebi.ac.uk/efo/EFO_0006335	GCST90239829	Genome-wide genotyping array
	2023-05-31	36641522	Sinkala M	2023-01-14	Commun Biol	www.ncbi.nlm.nih.gov/pubmed/36641522	A genome-wide association study identifies distinct variants associated with pulmonary function among European and African ancestries from the UK Biobank.	FEV1	383,471 European ancestry individuals	NA	2q37.3	2	238954831		LINC01940 - HDAC4	ENSG00000227744	ENSG00000068024		28562	93337	rs62191107-?	rs62191107	0	62191107	intergenic_variant	1	NR	4e-20	19.3979				NR [NR] (imputed)	N	forced expiratory volume	http://www.ebi.ac.uk/efo/EFO_0004314	GCST90270081	Genome-wide genotyping array
	2023-02-09	36224396	Yengo L	2022-10-12	Nature	www.ncbi.nlm.nih.gov/pubmed/36224396	A saturated map of common genetic variants associated with human height.	Height	5,314,291 European ancestry, Hispanic or Latin American, East Asian ancestry, African ancestry, South Asian ancestry individuals	NA	2q37.3	2	238943440		LINC01940 - HDAC4	ENSG00000227744	ENSG00000068024		17171	104728	rs4353673-C	rs4353673	0	4353673	intergenic_variant	1	0.2938	3e-23	22.5229		0.0067	[0.0053-0.0081] unit decrease	Affymetrix, Illumina [1385132] (imputed)	N	body height	http://purl.obolibrary.org/obo/OBA_VT0001253	GCST90245848	Genome-wide genotyping array
	2023-02-09	36224396	Yengo L	2022-10-12	Nature	www.ncbi.nlm.nih.gov/pubmed/36224396	A saturated map of common genetic variants associated with human height.	Height	5,314,291 European ancestry, Hispanic or Latin American, East Asian ancestry, African ancestry, South Asian ancestry individuals	NA	2q37.3	2	238956042		LINC01940 - HDAC4	ENSG00000227744	ENSG00000068024		29773	92126	rs4591362-A	rs4591362	0	4591362	intergenic_variant	1	0.1977	2e-19	18.699		0.0069	[0.0053-0.0085] unit increase	Affymetrix, Illumina [1385132] (imputed)	N	body height	http://purl.obolibrary.org/obo/OBA_VT0001253	GCST90245848	Genome-wide genotyping array
	2025-01-06	39024449	Verma A	2024-07-19	Science	www.ncbi.nlm.nih.gov/pubmed/39024449	Diversity and scale: Genetic architecture of 2068 traits in the VA Million Veteran Program.	Unspecified diffuse connective tissue disease (PheCode 709.7)	290 African American or Afro-Caribbean cases, 121,440 African American or Afro-Caribbean controls, 430 European ancestry cases, 450,463 European ancestry controls	NA	2q37.3	2	239034201		LINC01940 - HDAC4	ENSG00000227744	ENSG00000068024		107932	13967	rs183986544-C	rs183986544	0	183986544	intergenic_variant	1	0.9992	2e-11	10.699		3.356	[3.33-3.38] unit decrease	NR [44300000] (imputed)	N	mixed connective tissue disease	http://www.ebi.ac.uk/efo/EFO_0007374	GCST90480488	Genome-wide genotyping array
	2016-02-07	25918132	Yucesoy B	2015-04-26	Toxicol Sci	www.ncbi.nlm.nih.gov/pubmed/25918132	Genome-Wide Association Study Identifies Novel Loci Associated With Diisocyanate-Induced Occupational Asthma.	Diisocyanate-induced asthma	74 European ancestry cases, 824 European ancestry controls	NA	2q37.3	2	239519464	LOC100132902, FLJ45964	HDAC4-AS1 - LINC02991	ENSG00000222020	ENSG00000196758		116807	58837	rs10174165-A	rs10174165	0	10174165	intergenic_variant	1	0.075	2e-06	5.69897		2.89	[1.84-4.53]	Illumina [1556551]	N	asthma, response to diisocyanate	http://purl.obolibrary.org/obo/MONDO_0004979, http://www.ebi.ac.uk/efo/EFO_0006995	GCST002875	Genome-wide genotyping array
	2015-07-28	25188341	Beecham GW	2014-09-04	PLoS Genet	www.ncbi.nlm.nih.gov/pubmed/25188341	Genome-wide association meta-analysis of neuropathologic features of Alzheimer's disease and related dementias.	Neuritic plaque	up to 4,232 individuals	NA	2q37.3	2	239409300	intergenic	HDAC4-AS1 - LINC02991	ENSG00000222020	ENSG00000196758		6643	169001	rs843451-G	rs843451	0	843451	intergenic_variant	1	0.742	7e-06	5.1549	(Ordinal)	0.2849	[0.16-0.41] unit decrease	Affymetrix, Illumina [NR] (imputed)	N	neuritic plaque measurement	http://www.ebi.ac.uk/efo/EFO_0006798	GCST002592	Genome-wide genotyping array
	2019-07-12	31164008	Mullins N	2019-06-05	Am J Psychiatry	www.ncbi.nlm.nih.gov/pubmed/31164008	GWAS of Suicide Attempt in Psychiatric Disorders and Association With Major Depression Polygenic Risk Scores.	Suicide attempts in major depressive disorder	1,622 European ancestry attempters, 8,786 European ancestry nonattempters	NA	2q37.3	2	239551396	NR	HDAC4-AS1 - LINC02991	ENSG00000222020	ENSG00000196758		148739	26905	rs186736781-T	rs186736781	0	186736781	intergenic_variant	1	0.02	6e-07	6.22185		2.27	1.64-3.13	NR [8482392] (imputed)	N	attempted suicide	http://www.ebi.ac.uk/efo/EFO_0004321	GCST008118	Genome-wide genotyping array
	2017-03-17	27089181	Okbay A	2016-04-18	Nat Genet	www.ncbi.nlm.nih.gov/pubmed/27089181	Genetic variants associated with subjective well-being, depressive symptoms, and neuroticism identified through genome-wide analyses.	Neuroticism	170,911 European ancestry individuals	NA	2q37.3	2	239427401	NR	HDAC4-AS1 - LINC02991	ENSG00000222020	ENSG00000196758		24744	150900	rs4241231-A	rs4241231	0	4241231	intergenic_variant	1	0.518	2e-06	5.69897		0.0165574	[0.0097-0.0234] unit increase	Affymetrix [up to 6544775] (imputed)	N	neuroticism measurement	http://www.ebi.ac.uk/efo/EFO_0007660	GCST003770	Genome-wide genotyping array
	2015-06-23	25189868	Sung YJ	2014-09-03	Am J Hypertens	www.ncbi.nlm.nih.gov/pubmed/25189868	Gene-smoking interactions identify several novel blood pressure loci in the Framingham Heart Study.	Blood pressure (smoking interaction)	Up to 6,889 individuals	NA	2q37.3	2	239522525	FLJ45964	HDAC4-AS1 - LINC02991	ENSG00000222020	ENSG00000196758		119868	55776	rs11679072-?	rs11679072	0	11679072	intergenic_variant	1	NR	6e-07	6.22185	(SBP,Pack-years)			Affymetrix [2485435] (imputed)	N	pack-years measurement, systolic blood pressure	http://www.ebi.ac.uk/efo/EFO_0006526, http://www.ebi.ac.uk/efo/EFO_0006335	GCST002587	Genome-wide genotyping array
	2009-11-30	19875103	Aberg K	2009-10-27	Biol Psychiatry	www.ncbi.nlm.nih.gov/pubmed/19875103	Genomewide association study of movement-related adverse antipsychotic effects.	Response to antipsychotic therapy (extrapyramidal side effects)	421 European ancestry schizophrenia cases, 214 African American schizophrenia cases, 103 schizophrenia cases	NA	2q37.3	2	239496966	intergenic	HDAC4-AS1 - LINC02991	ENSG00000222020	ENSG00000196758		94309	81335	rs6743931-?	rs6743931	0	6743931	regulatory_region_variant	1	NR	2e-06	5.69897	(AIMS)			Affymetrix [492000]	N	response to antipsychotic drug	http://purl.obolibrary.org/obo/GO_0097332	GCST000514	Genome-wide genotyping array
	2014-11-21	24800985	Agopian AJ	2014-05-06	PLoS One	www.ncbi.nlm.nih.gov/pubmed/24800985	Genome-wide association study of maternal and inherited loci for conotruncal heart defects.	Conotruncal heart defects	537 European ancestry case-parent trios, 213 case-parent trios	348 European ancestry case-parent trios, 10 case-parent trios	2q37.3	2	239522359	AC079612.1	HDAC4-AS1 - LINC02991	ENSG00000222020	ENSG00000196758		119702	55942	rs6706785-?	rs6706785	0	6706785	intergenic_variant	1	NR	6e-06	5.22185	(EA, Inherited)	1.91	[1.44-.254]	Illumina [2421290] (imputed)	N	conotruncal heart malformations	http://purl.obolibrary.org/obo/MONDO_0016581	GCST002438	Genome-wide genotyping array
	2021-09-24	33349686	Wendt FR	2020-12-21	Nat Hum Behav	www.ncbi.nlm.nih.gov/pubmed/33349686	Multivariate genome-wide analysis of education, socioeconomic status and brain phenome.	Neuroticism conditioned on cognitive performance (multi-trait conditioning and joint analysis)	170,911 European ancestry individuals	NA	2q37.3	2	239427401		HDAC4-AS1 - LINC02991	ENSG00000222020	ENSG00000196758		24744	150900	rs4241231-?	rs4241231	0	4241231	intergenic_variant	1	NR	2e-09	8.69897				NR [NR]	N	neuroticism measurement	http://www.ebi.ac.uk/efo/EFO_0007660	GCST90027239	Genome-wide genotyping array
	2021-09-24	33349686	Wendt FR	2020-12-21	Nat Hum Behav	www.ncbi.nlm.nih.gov/pubmed/33349686	Multivariate genome-wide analysis of education, socioeconomic status and brain phenome.	Neuroticism conditioned on Townsend deprivation index (multi-trait conditioning and joint analysis)	170,911 European ancestry individuals	NA	2q37.3	2	239427401		HDAC4-AS1 - LINC02991	ENSG00000222020	ENSG00000196758		24744	150900	rs4241231-?	rs4241231	0	4241231	intergenic_variant	1	NR	2e-09	8.69897				NR [NR]	N	neuroticism measurement	http://www.ebi.ac.uk/efo/EFO_0007660	GCST90027240	Genome-wide genotyping array
	2021-09-24	33349686	Wendt FR	2020-12-21	Nat Hum Behav	www.ncbi.nlm.nih.gov/pubmed/33349686	Multivariate genome-wide analysis of education, socioeconomic status and brain phenome.	Neuroticism conditioned on educational attainment (multi-trait conditioning and joint analysis)	170,911 European ancestry individuals	NA	2q37.3	2	239427401		HDAC4-AS1 - LINC02991	ENSG00000222020	ENSG00000196758		24744	150900	rs4241231-?	rs4241231	0	4241231	intergenic_variant	1	NR	2e-08	7.69897				NR [NR]	N	neuroticism measurement	http://www.ebi.ac.uk/efo/EFO_0007660	GCST90027241	Genome-wide genotyping array
	2021-09-24	33349686	Wendt FR	2020-12-21	Nat Hum Behav	www.ncbi.nlm.nih.gov/pubmed/33349686	Multivariate genome-wide analysis of education, socioeconomic status and brain phenome.	Neuroticism conditioned on self-rated math ability (multi-trait conditioning and joint analysis)	170,911 European ancestry individuals	NA	2q37.3	2	239427401		HDAC4-AS1 - LINC02991	ENSG00000222020	ENSG00000196758		24744	150900	rs4241231-?	rs4241231	0	4241231	intergenic_variant	1	NR	6e-09	8.22185				NR [NR]	N	neuroticism measurement	http://www.ebi.ac.uk/efo/EFO_0007660	GCST90027244	Genome-wide genotyping array
	2021-09-24	33349686	Wendt FR	2020-12-21	Nat Hum Behav	www.ncbi.nlm.nih.gov/pubmed/33349686	Multivariate genome-wide analysis of education, socioeconomic status and brain phenome.	Neuroticism conditioned on highest math class (multi-trait conditioning and joint analysis)	170,911 European ancestry individuals	NA	2q37.3	2	239427401		HDAC4-AS1 - LINC02991	ENSG00000222020	ENSG00000196758		24744	150900	rs4241231-?	rs4241231	0	4241231	intergenic_variant	1	NR	3e-09	8.52288				NR [NR]	N	neuroticism measurement	http://www.ebi.ac.uk/efo/EFO_0007660	GCST90027242	Genome-wide genotyping array
	2023-01-12	35712048	Pain O	2022-04-01	Biol Psychiatry Glob Open Sci	www.ncbi.nlm.nih.gov/pubmed/35712048	Identifying the Common Genetic Basis of Antidepressant Response.	Response to antidepressants (symptom improvement) in major depressive disorder	5,218 European ancestry individuals	NA	2q37.3	2	239462128		HDAC4-AS1 - LINC02991	ENSG00000222020	ENSG00000196758		59471	116173	rs73001560-C	rs73001560	0	73001560	intergenic_variant	1	0.881	1e-05	5		0.86122	[0.79-0.93] unit increase	Affymetrix, Illumina [8697190] (imputed)	N	depressive symptom measurement, response to antidepressant	http://www.ebi.ac.uk/efo/EFO_0007006, http://purl.obolibrary.org/obo/GO_0036276	GCST90244578	Genome-wide genotyping array
	2020-07-28	32450446	Wang H	2020-04-29	Neurobiol Aging	www.ncbi.nlm.nih.gov/pubmed/32450446	Genome-wide interaction analysis of pathological hallmarks in Alzheimer's disease.	Total PHF-tau (SNP x SNP interaction)	1,285 individuals	NA	3p25.1 x 2q37.3	3 x 2	13272318 x 239102958	NR x NR	IQSEC1 x HDAC4						rs357155-? x rs6543510-?	rs357155 x rs6543510	0		intron_variant x intron_variant		NR	3e-12	11.5229				Affymetrix, Illumina [279409] (imputed)	N	PHF-tau measurement	http://www.ebi.ac.uk/efo/EFO_0010750	GCST010340	Genome-wide genotyping array
	2020-07-28	32450446	Wang H	2020-04-29	Neurobiol Aging	www.ncbi.nlm.nih.gov/pubmed/32450446	Genome-wide interaction analysis of pathological hallmarks in Alzheimer's disease.	Total PHF-tau (SNP x SNP interaction)	1,285 individuals	NA	2q37.3 x 3q26.1	2 x 3	239100676 x 165454985	NR x NR	HDAC4 x LINC01322						rs6754852-? x rs6789884-?	rs6754852 x rs6789884	0		intron_variant x intergenic_variant		NR	4e-09	8.39794				Affymetrix, Illumina [279409] (imputed)	N	PHF-tau measurement	http://www.ebi.ac.uk/efo/EFO_0010750	GCST010340	Genome-wide genotyping array
	2024-09-12	37984853	Eissman JM	2023-11-20	Alzheimers Dement	www.ncbi.nlm.nih.gov/pubmed/37984853	Sex-specific genetic architecture of late-life memory performance.	Memory decline in normal cognition	391 African ancestry males	NA	2q37.3	2	239483948		HDAC4-AS1 - LINC02991	ENSG00000222020	ENSG00000196758		81291	94353	rs6729882-?	rs6729882	0	6729882	intergenic_variant	1	NR	4e-06	5.39794		0.018925	unit decrease	Affymetrix, Illumina [NR] (imputed)	N	memory performance	http://www.ebi.ac.uk/efo/EFO_0004874	GCST90448450	Genome-wide genotyping array
	2024-03-28	37500982	He D	2023-07-27	Osteoporos Int	www.ncbi.nlm.nih.gov/pubmed/37500982	A longitudinal genome-wide association study of bone mineral density mean and variability in the UK Biobank.	Bone mineral density variability	5,862 South Asian ancestry individuals	NA	2q37.3	2	239442632		HDAC4-AS1 - LINC02991	ENSG00000222020	ENSG00000196758		39975	135669	rs73001551-?	rs73001551	0	73001551	intergenic_variant	1	NR	2e-08	7.69897				NR [NR] (imputed)	N	bone density	http://purl.obolibrary.org/obo/OBA_1000110	GCST90321121	Genome-wide genotyping array
	2024-03-28	37500982	He D	2023-07-27	Osteoporos Int	www.ncbi.nlm.nih.gov/pubmed/37500982	A longitudinal genome-wide association study of bone mineral density mean and variability in the UK Biobank.	Bone mineral density variability	5,862 South Asian ancestry individuals	NA	2q37.3	2	239409608		HDAC4-AS1 - LINC02991	ENSG00000222020	ENSG00000196758		6951	168693	rs143859108-?	rs143859108	0	143859108	intergenic_variant	1	NR	4e-08	7.39794				NR [NR] (imputed)	N	bone density	http://purl.obolibrary.org/obo/OBA_1000110	GCST90321121	Genome-wide genotyping array
	2022-09-28	34282934	Fan W	2021-07-20	mSystems	www.ncbi.nlm.nih.gov/pubmed/34282934	Association between Human Genetic Variants and the Vaginal Bacteriome of Pregnant Women.	Vaginal microbiome relative abundance (s_Finegoldia magna)	315 Chinese ancestry individuals	NA	2q37.3	2	239509067		HDAC4-AS1 - LINC02991	ENSG00000222020	ENSG00000196758		106410	69234	rs74002813-T	rs74002813	0	74002813	intergenic_variant	1	NR	8e-06	5.09691		0.4268	[0.24-0.61] unit increase	Illumina [492582]	N	vaginal microbiome measurement	http://www.ebi.ac.uk/efo/EFO_0011013	GCST90027009	Genome-wide genotyping array
	2022-09-13	35893037	Pipal KV	2022-07-22	Genes (Basel)	www.ncbi.nlm.nih.gov/pubmed/35893037	Susceptibility Loci for Type 2 Diabetes in the Ethnically Endogamous Indian Sindhi Population: A Pooled Blood Genome-Wide Association Study.	Type 2 diabetes	418 Sindhi ancestry cases from endogamous families, 984 Sindhi ancestry controls from endogamous families	NA	2q37.3	2	239513918		HDAC4-AS1 - LINC02991	ENSG00000222020	ENSG00000196758		111261	64383	rs61406133-?	rs61406133	0	61406133	intergenic_variant	1	NR	2e-18	17.699				Illumina [608550]	N	type 2 diabetes mellitus	http://purl.obolibrary.org/obo/MONDO_0005148	GCST90134620	Genome-wide genotyping array
	2020-07-28	32450446	Wang H	2020-04-29	Neurobiol Aging	www.ncbi.nlm.nih.gov/pubmed/32450446	Genome-wide interaction analysis of pathological hallmarks in Alzheimer's disease.	Total PHF-tau (SNP x SNP interaction)	1,285 individuals	NA	2q37.3 x 10p13	2 x 10	239496543 x 14458796	NR x NR	HDAC4-AS1 - LINC02991 x FRMD4A						rs10196561-? x rs11259112-?	rs10196561 x rs11259112	0		intergenic_variant x intergenic_variant		NR	3e-12	11.5229				Affymetrix, Illumina [279409] (imputed)	N	PHF-tau measurement	http://www.ebi.ac.uk/efo/EFO_0010750	GCST010340	Genome-wide genotyping array
	2020-07-28	32450446	Wang H	2020-04-29	Neurobiol Aging	www.ncbi.nlm.nih.gov/pubmed/32450446	Genome-wide interaction analysis of pathological hallmarks in Alzheimer's disease.	Total PHF-tau (SNP x SNP interaction)	1,285 individuals	NA	2q37.3 x 8q21.13	2 x 8	239496543 x 78831454	NR x NR	HDAC4-AS1 - LINC02991 x MITA1						rs10196561-? x rs2581738-?	rs10196561 x rs2581738	0		intergenic_variant x intergenic_variant		NR	7e-08	7.1549				Affymetrix, Illumina [279409] (imputed)	N	PHF-tau measurement	http://www.ebi.ac.uk/efo/EFO_0010750	GCST010340	Genome-wide genotyping array
	2020-07-28	32450446	Wang H	2020-04-29	Neurobiol Aging	www.ncbi.nlm.nih.gov/pubmed/32450446	Genome-wide interaction analysis of pathological hallmarks in Alzheimer's disease.	Total PHF-tau (SNP x SNP interaction)	1,285 individuals	NA	2q37.3	2	239102958	NR x NR	HDAC4 x No mapped genes						rs6543510-? x rs10979188-?	rs6543510 x rs10979188	0		intron_variant		NR	1e-07	7				Affymetrix, Illumina [279409] (imputed)	N	PHF-tau measurement	http://www.ebi.ac.uk/efo/EFO_0010750	GCST010340	Genome-wide genotyping array
	2020-07-28	32450446	Wang H	2020-04-29	Neurobiol Aging	www.ncbi.nlm.nih.gov/pubmed/32450446	Genome-wide interaction analysis of pathological hallmarks in Alzheimer's disease.	Neurofibrillary tangles (SNP x SNP interaction)	1,316 individuals	NA	10q11.21 x 2q37.3	10 x 2	44418308 x 239062482	NR x NR	RPL9P21 - TMEM72-AS1 x HDAC4						rs11239037-? x rs2100172-?	rs11239037 x rs2100172	0		intergenic_variant x intron_variant		NR	2e-08	7.69897				Affymetrix, Illumina [279409] (imputed)	N	neurofibrillary tangles measurement	http://www.ebi.ac.uk/efo/EFO_0006797	GCST010343	Genome-wide genotyping array
	2020-07-28	32450446	Wang H	2020-04-29	Neurobiol Aging	www.ncbi.nlm.nih.gov/pubmed/32450446	Genome-wide interaction analysis of pathological hallmarks in Alzheimer's disease.	Total PHF-tau (SNP x SNP interaction)	1,285 individuals	NA	2q37.3 x 18q11.2	2 x 18	239496543 x 22655718	NR x NR	HDAC4-AS1 - LINC02991 x RNU6-1032P - RBBP8						rs10196561-? x rs10853450-?	rs10196561 x rs10853450	0		intergenic_variant x intergenic_variant		NR	6e-10	9.22185				Affymetrix, Illumina [279409] (imputed)	N	PHF-tau measurement	http://www.ebi.ac.uk/efo/EFO_0010750	GCST010340	Genome-wide genotyping array
	2020-07-28	32450446	Wang H	2020-04-29	Neurobiol Aging	www.ncbi.nlm.nih.gov/pubmed/32450446	Genome-wide interaction analysis of pathological hallmarks in Alzheimer's disease.	Total PHF-tau (SNP x SNP interaction)	1,285 individuals	NA	2q37.3 x 9p13.2	2 x 9	239496543 x 36307155	NR x NR	HDAC4-AS1 - LINC02991 x HMGB3P24 - RNF38						rs10196561-? x rs10114094-?	rs10196561 x rs10114094	0		intergenic_variant x regulatory_region_variant		NR	7e-10	9.1549				Affymetrix, Illumina [279409] (imputed)	N	PHF-tau measurement	http://www.ebi.ac.uk/efo/EFO_0010750	GCST010340	Genome-wide genotyping array
	2020-07-28	32450446	Wang H	2020-04-29	Neurobiol Aging	www.ncbi.nlm.nih.gov/pubmed/32450446	Genome-wide interaction analysis of pathological hallmarks in Alzheimer's disease.	Total PHF-tau (SNP x SNP interaction)	1,285 individuals	NA	2q37.3 x 20p12.3	2 x 20	239496543 x 5336940	NR x NR	HDAC4-AS1 - LINC02991 x PROKR2 - RNA5-8SP7						rs10196561-? x rs2145095-?	rs10196561 x rs2145095	0		intergenic_variant x intergenic_variant		NR	1e-11	11				Affymetrix, Illumina [279409] (imputed)	N	PHF-tau measurement	http://www.ebi.ac.uk/efo/EFO_0010750	GCST010340	Genome-wide genotyping array
	2020-07-28	32450446	Wang H	2020-04-29	Neurobiol Aging	www.ncbi.nlm.nih.gov/pubmed/32450446	Genome-wide interaction analysis of pathological hallmarks in Alzheimer's disease.	Total PHF-tau (SNP x SNP interaction)	1,285 individuals	NA	2q37.3 x 15q22.2	2 x 15	239496543 x 60183143	NR x NR	HDAC4-AS1 - LINC02991 x FOXB1 - ANXA2						rs10196561-? x rs2414660-?	rs10196561 x rs2414660	0		intergenic_variant x intergenic_variant		NR	2e-10	9.69897				Affymetrix, Illumina [279409] (imputed)	N	PHF-tau measurement	http://www.ebi.ac.uk/efo/EFO_0010750	GCST010340	Genome-wide genotyping array
Yes	2016-07-23	26198764	Goes FS	2015-07-21	Am J Med Genet B Neuropsychiatr Genet	www.ncbi.nlm.nih.gov/pubmed/26198764	Genome-wide association study of schizophrenia in Ashkenazi Jews.	Schizophrenia	592 Ashkenazi Jewish ancestry cases, 505 Ashkenazi Jewish ancestry controls, 36,989 cases, 113,075 controls	NA	10q21.1	10	52184682	NR	PRKG1, PRKG1-AS1			ENSG00000185532, ENSG00000236671			rs61847307-C	rs61847307	0	61847307	intron_variant	0	NR	4e-07	6.39794		1.06383	[NR]	Illumina [7158791] (imputed)	N	schizophrenia	http://purl.obolibrary.org/obo/MONDO_0005090	GCST003048	Genome-wide genotyping array
	2019-02-08	30595370	Kichaev G	2018-12-27	Am J Hum Genet	www.ncbi.nlm.nih.gov/pubmed/30595370	Leveraging Polygenic Functional Enrichment to Improve GWAS Power.	Heel bone mineral density	approximately 446,000 European ancestry individuals	NA	10q21.1	10	52206364		PRKG1-AS1, PRKG1			ENSG00000236671, ENSG00000185532			rs1194491-?	rs1194491	0	1194491	intron_variant	0	NR	3e-13	12.5229				NR [~ 8900000] (imputed)	N	heel bone mineral density	http://www.ebi.ac.uk/efo/EFO_0009270	GCST007066	Genome-wide genotyping array
Yes	2019-12-23	31740837	Lam M	2019-11-18	Nat Genet	www.ncbi.nlm.nih.gov/pubmed/31740837	Comparative genetic architectures of schizophrenia in East Asian and European populations.	Schizophrenia	22,778 East Asian ancestry cases, 35,362 East Asian ancestry controls, 33,640 European ancestry cases, 43,456 European ancestry controls	NA	10q21.1	10	52180766	NR	PRKG1, PRKG1-AS1			ENSG00000185532, ENSG00000236671			rs61847303-?	rs61847303	0	61847303	intron_variant	0	NR	2e-08	7.69897		1.063	[1.04-1.08]	Affymetrix, Illumina [12447948] (imputed)	N	schizophrenia	http://purl.obolibrary.org/obo/MONDO_0005090	GCST009337	Genome-wide genotyping array
	2017-06-23	28265120	Polimanti R	2017-03-07	Mol Psychiatry	www.ncbi.nlm.nih.gov/pubmed/28265120	A genome-wide gene-by-trauma interaction study of alcohol misuse in two independent cohorts identifies PRKG1 as a risk locus.	Alcohol misuse (trauma interaction)	1,748 African American trauma-exposed individuals, 643 African American trauma-unexposed individuals, 10,732 European ancestry trauma-exposed and unexposed individuals, 3,238 Hispanic trauma-exposed and unexposed individuals	2,738 African American trauma-exposed individuals, 1,591 African American trauma-unexposed individuals, 3,755 European ancestry trauma-exposed and unexposed individuals	10q21.1	10	52223498	PRKG1	PRKG1-AS1, PRKG1			ENSG00000236671, ENSG00000185532			rs1729578-C	rs1729578	0	1729578	intron_variant	0	0.23	2e-08	7.69897	(AA)	5.64	z score increase	Illumina [NR] (imputed)	N	stressful life event measurement, alcohol dependence measurement	http://www.ebi.ac.uk/efo/EFO_0007781, http://www.ebi.ac.uk/efo/EFO_0007835	GCST004225	Genome-wide genotyping array
Yes	2021-09-24	34506852	Chang X	2021-09-07	J Allergy Clin Immunol	www.ncbi.nlm.nih.gov/pubmed/34506852	A genome-wide association meta-analysis identifies new Eosinophilic esophagitis loci.	Eosinophilic esophagitis	1,930 European ancestry cases, 13,634 European ancestry controls	NA	10q21.1	10	52207157	PRKG1	PRKG1, PRKG1-AS1			ENSG00000185532, ENSG00000236671			rs185811602-T	rs185811602	0	185811602	intron_variant	0	0.0011	1e-08	8		6.37	[3.38-11.97]	Illumina [11310926] (imputed)	N	eosinophilic esophagitis	http://www.ebi.ac.uk/efo/EFO_0004232	GCST90027899	Genome-wide genotyping array
Yes	2019-02-21	30285260	Ikeda M	2018-10-03	Schizophr Bull	www.ncbi.nlm.nih.gov/pubmed/30285260	Genome-Wide Association Study Detected Novel Susceptibility Genes for Schizophrenia and Shared Trans-Populations/Diseases Genetic Effect.	Schizophrenia	14,023 East Asian ancestry cases, 33,640 European ancestry cases, 31,505 East Asian ancestry controls, 43,456 European ancestry controls	NA	10q21.1	10	52184682	PRKG1	PRKG1, PRKG1-AS1			ENSG00000185532, ENSG00000236671			rs61847307-C	rs61847307	0	61847307	intron_variant	0	NR	1e-06	6	(EA)	1.06168	[1.04-1.09]	Illumina [6627481] (imputed)	N	schizophrenia	http://purl.obolibrary.org/obo/MONDO_0005090	GCST007201	Genome-wide genotyping array
Yes	2019-02-21	30285260	Ikeda M	2018-10-03	Schizophr Bull	www.ncbi.nlm.nih.gov/pubmed/30285260	Genome-Wide Association Study Detected Novel Susceptibility Genes for Schizophrenia and Shared Trans-Populations/Diseases Genetic Effect.	Schizophrenia	14,023 East Asian ancestry cases, 33,640 European ancestry cases, 31,505 East Asian ancestry controls, 43,456 European ancestry controls	NA	10q21.1	10	52184682	PRKG1	PRKG1, PRKG1-AS1			ENSG00000185532, ENSG00000236671			rs61847307-C	rs61847307	0	61847307	intron_variant	0	NR	5e-07	6.30103		1.06045	[1.04-1.08]	Illumina [6627481] (imputed)	N	schizophrenia	http://purl.obolibrary.org/obo/MONDO_0005090	GCST007201	Genome-wide genotyping array
Yes	2017-08-16	28540026	Anney RJL	2017-05-22	Mol Autism	www.ncbi.nlm.nih.gov/pubmed/28540026	Meta-analysis of GWAS of over 16,000 individuals with autism spectrum disorder highlights a novel locus at 10q24.32 and a significant overlap with schizophrenia.	Autism spectrum disorder or schizophrenia	schizophrenia cases and controls (see Ripke, 2014), up to 6,197 European ancestry ASD cases, up to 7,377 European ancestry controls, up to 1,190 ASD cases, up to 1,190 controls	NA	10q21.1	10	52184682	PRKG1	PRKG1, PRKG1-AS1			ENSG00000185532, ENSG00000236671			rs61847307-?	rs61847307	0	61847307	intron_variant	0	NR	3e-08	7.52288		1.06383	[1.04-1.09]	Affymetrix, Illumina [NR]	N	autism spectrum disorder, schizophrenia	http://www.ebi.ac.uk/efo/EFO_0003756, http://purl.obolibrary.org/obo/MONDO_0005090	GCST004521	Genome-wide genotyping array
Yes	2017-11-10	28991256	Li Z	2017-10-09	Nat Genet	www.ncbi.nlm.nih.gov/pubmed/28991256	Genome-wide association analysis identifies 30 new susceptibility loci for schizophrenia.	Schizophrenia	7,699 Chinese ancestry cases, 35,476 European ancestry cases, 18,327 Chinese ancestry controls, 46,839 European ancestry controls	4,384 Chinese ancestry cases, 5,770 Chinese ancestry controls	10q21.1	10	52184682	intergenic	PRKG1, PRKG1-AS1			ENSG00000185532, ENSG00000236671			rs61847307-C	rs61847307	0	61847307	intron_variant	0	NR	4e-07	6.39794		1.06045	[1.04-1.08]	Affymetrix, Illumina [up to 5107227] (imputed)	N	schizophrenia	http://purl.obolibrary.org/obo/MONDO_0005090	GCST004946	Genome-wide genotyping array
	2022-12-13	34620218	Meeks KAC	2021-10-07	Genome Med	www.ncbi.nlm.nih.gov/pubmed/34620218	Genome-wide analyses of multiple obesity-related cytokines and hormones informs biology of cardiometabolic traits.	Insulin levels in lean individuals	974 Sub-Saharan African ancestry individuals	1,563 African American individuals	10q21.1	10	52190941		PRKG1, PRKG1-AS1			ENSG00000185532, ENSG00000236671			rs142108645-T	rs142108645	0	142108645	intron_variant	0	NR	2e-08	7.69897	(Sub-Saharan African)	0.894	[0.58-1.2] unit decrease	Affymetrix, Illumina [NR] (imputed)	N	insulin measurement	http://www.ebi.ac.uk/efo/EFO_0004467	GCST90091171	Genome-wide genotyping array
	2022-09-01	31882771	Al-Khelaifi F	2019-12-27	Sci Rep	www.ncbi.nlm.nih.gov/pubmed/31882771	Metabolic GWAS of elite athletes reveals novel genetically-influenced metabolites associated with athletic performance.	Oleoyl-oleoyl-glycerol (18:1/18:1) [2] levels in elite athletes	490 individuals	NA	10q21.1	10	52169628		PRKG1, PRKG1-AS1			ENSG00000185532, ENSG00000236671			rs61847297-?	rs61847297	0	61847297	intron_variant	0	NR	5e-06	5.30103		1.12061	[0.64-1.6] unit increase	Illumina [275016]	N	lipid measurement	http://www.ebi.ac.uk/efo/EFO_0004529	GCST90134036	Genome-wide genotyping array
	2023-10-12	37688361	Tavares LC	2023-09-08	United European Gastroenterol J	www.ncbi.nlm.nih.gov/pubmed/37688361	A pilot genome-wide association study meta-analysis of gastroparesis.	Gastroparesis	880 European ancestry cases, 58,271 European ancestry controls	NA	10q21.1	10	52220867		PRKG1, PRKG1-AS1			ENSG00000185532, ENSG00000236671			rs58826461-T	rs58826461	0	58826461	intron_variant	0	0.1	7e-06	5.1549		0.6	[0.5-0.8]	Illumina [5811784] (imputed)	N	gastroparesis	http://www.ebi.ac.uk/efo/EFO_1000948	GCST90295922	Genome-wide genotyping array
	2023-02-09	36224396	Yengo L	2022-10-12	Nature	www.ncbi.nlm.nih.gov/pubmed/36224396	A saturated map of common genetic variants associated with human height.	Height	5,314,291 European ancestry, Hispanic or Latin American, East Asian ancestry, African ancestry, South Asian ancestry individuals	NA	10q21.1	10	52199695		PRKG1, PRKG1-AS1			ENSG00000185532, ENSG00000236671			rs2174257-A	rs2174257	0	2174257	intron_variant	0	0.5588	5e-15	14.301		0.0049	[0.0037-0.0061] unit increase	Affymetrix, Illumina [1385132] (imputed)	N	body height	http://purl.obolibrary.org/obo/OBA_VT0001253	GCST90245848	Genome-wide genotyping array
	2023-02-09	36224396	Yengo L	2022-10-12	Nature	www.ncbi.nlm.nih.gov/pubmed/36224396	A saturated map of common genetic variants associated with human height.	Height	5,314,291 European ancestry, Hispanic or Latin American, East Asian ancestry, African ancestry, South Asian ancestry individuals	NA	10q21.1	10	52277449		PRKG1-AS1, PRKG1			ENSG00000236671, ENSG00000185532			rs1919461-G	rs1919461	0	1919461	intron_variant	0	0.5657	7e-13	12.1549		0.0045	[0.0033-0.0057] unit increase	Affymetrix, Illumina [1385132] (imputed)	N	body height	http://purl.obolibrary.org/obo/OBA_VT0001253	GCST90245848	Genome-wide genotyping array
	2019-02-08	30595370	Kichaev G	2018-12-27	Am J Hum Genet	www.ncbi.nlm.nih.gov/pubmed/30595370	Leveraging Polygenic Functional Enrichment to Improve GWAS Power.	Heel bone mineral density	approximately 446,000 European ancestry individuals	NA	10q21.1	10	52309643		PRKG1-AS1			ENSG00000236671			rs7906360-?	rs7906360	0	7906360	intergenic_variant	0	NR	3e-16	15.5229				NR [~ 8900000] (imputed)	N	heel bone mineral density	http://www.ebi.ac.uk/efo/EFO_0009270	GCST007066	Genome-wide genotyping array
	2019-05-21	30595370	Kichaev G	2018-12-27	Am J Hum Genet	www.ncbi.nlm.nih.gov/pubmed/30595370	Leveraging Polygenic Functional Enrichment to Improve GWAS Power.	Height	approximately 458,000 European ancestry individuals	NA	10q11.23	10	50980049		MIX23P2 - PRKG1	ENSG00000236944	ENSG00000185532		16691	10839	rs10995225-?	rs10995225	0	10995225	intergenic_variant	1	NR	2e-25	24.699				NR [~ 8900000] (imputed)	N	body height	http://purl.obolibrary.org/obo/OBA_VT0001253	GCST007841	Genome-wide genotyping array
	2015-06-12	25342443	Lindstrom S	2014-10-24	Nat Commun	www.ncbi.nlm.nih.gov/pubmed/25342443	Genome-wide association study identifies multiple loci associated with both mammographic density and breast cancer risk.	Mammographic density (non-dense area)	7,600 European ancestry individuals	343 European ancestry individuals, 1,472 Old Order Amish individuals, 8,564 individuals	10q21.1	10	51695802	PRKG1, CSTF2T	PRKG1, CSTF2T			ENSG00000185532, ENSG00000177613			rs14168-A	rs14168	0	14168	3_prime_UTR_variant	0	0.94	3e-06	5.52288				Affymetrix, Illumina [~ 2500000] (imputed)	N	non-dense area measurement, mammographic density measurement	http://www.ebi.ac.uk/efo/EFO_0006504, http://www.ebi.ac.uk/efo/EFO_0005941	GCST002668	Genome-wide genotyping array
	2021-12-15	34560273	Shadrin AA	2021-09-21	Neuroimage	www.ncbi.nlm.nih.gov/pubmed/34560273	Vertex-wise multivariate genome-wide association study identifies 780 unique genetic loci associated with cortical morphology.	Cortical surface area	35,657 White British ancestry individuals	NA	10q11.23	10	50974953	NR	MIX23P2 - PRKG1	ENSG00000236944	ENSG00000185532		11595	15935	rs10822023-A	rs10822023	0	10822023	intergenic_variant	1	0.3424	8e-09	8.09691				NR [9056863] (imputed)	N	cerebral cortex area attribute	http://purl.obolibrary.org/obo/OBA_2045267	GCST90091060	Genome-wide genotyping array
	2023-05-11	37106081	Schoeler T	2023-04-27	Nat Hum Behav	www.ncbi.nlm.nih.gov/pubmed/37106081	Participation bias in the UK Biobank distorts genetic associations and downstream analyses.	Height (standard GWA)	283,749 European ancestry individuals	NA	10q11.23	10	50974681		MIX23P2 - PRKG1	ENSG00000236944	ENSG00000185532		11323	16207	rs10995206-A	rs10995206	0	10995206	intergenic_variant	1	NR	1e-10	10		0.11727	[0.082-0.153] unit increase	NR [7296935] (imputed)	N	body height	http://purl.obolibrary.org/obo/OBA_VT0001253	GCST90267284	Genome-wide genotyping array
	2023-05-11	37106081	Schoeler T	2023-04-27	Nat Hum Behav	www.ncbi.nlm.nih.gov/pubmed/37106081	Participation bias in the UK Biobank distorts genetic associations and downstream analyses.	Height (weighted GWA)	102,215 European ancestry individuals	NA	10q11.23	10	50974681		MIX23P2 - PRKG1	ENSG00000236944	ENSG00000185532		11323	16207	rs10995206-A	rs10995206	0	10995206	intergenic_variant	1	NR	7e-10	9.1549		0.19732	[0.13-0.26] unit increase	NR [7296935] (imputed)	N	body height	http://purl.obolibrary.org/obo/OBA_VT0001253	GCST90267285	Genome-wide genotyping array
	2022-12-21	35694926	Harper JD	2022-06-09	J Alzheimers Dis	www.ncbi.nlm.nih.gov/pubmed/35694926	Genome-Wide Association Study of Incident Dementia in a Community-Based Sample of Older Subjects.	Alzheimer's disease in non-APOE e4 carriers	232 European ancestry cases, 1,739 European ancestry controls	NA	10q11.23	10	50970067		MIX23P2 - PRKG1	ENSG00000236944	ENSG00000185532		6709	20821	rs150783484-?	rs150783484	0	150783484	intergenic_variant	1	NR	2e-06	5.69897		3.494	[2.087-5.852]	Illumina [14072053] (imputed)	N	Alzheimer disease, APOE carrier status	http://purl.obolibrary.org/obo/MONDO_0004975, http://www.ebi.ac.uk/efo/EFO_0007659	GCST90244033	Genome-wide genotyping array
	2022-12-21	35694926	Harper JD	2022-06-09	J Alzheimers Dis	www.ncbi.nlm.nih.gov/pubmed/35694926	Genome-Wide Association Study of Incident Dementia in a Community-Based Sample of Older Subjects.	Dementia in non-APOE e4 carriers	261 European ancestry cases, 1,739 European ancestry controls	NA	10q11.23	10	50970067		MIX23P2 - PRKG1	ENSG00000236944	ENSG00000185532		6709	20821	rs150783484-?	rs150783484	0	150783484	intergenic_variant	1	NR	2e-06	5.69897		3.377	[2.052-5.556]	Illumina [14072053] (imputed)	N	APOE carrier status, dementia	http://www.ebi.ac.uk/efo/EFO_0007659, http://purl.obolibrary.org/obo/MONDO_0001627	GCST90244035	Genome-wide genotyping array
	2022-08-04	35710981	Liu H	2022-06-16	Nat Genet	www.ncbi.nlm.nih.gov/pubmed/35710981	Epigenomic and transcriptomic analyses define core cell types, genes and targetable mechanisms for kidney disease.	Estimated glomerular filtration rate (creatinine)	1,205,871 European ancestry individuals, 168,300 East Asian ancestry individuals, 63,553 African ancestry individuals, 23,509 Hispanic or Latin American individuals, 22,103 African American individuals, 21,791 Central Asian or South Asian ancestry individuals, 1,502 Middle Eastern ancestry individuals, 939 other admixed ancestry individuals, 602 Native American ancestry individuals, 150 Asian anc…	NA	10q11.23	10	50974681		MIX23P2 - PRKG1	ENSG00000236944	ENSG00000185532		11323	16207	rs10995206-A	rs10995206	0	10995206	intergenic_variant	1	0.3377	1e-08	8		5.686	z score decrease	Affymetrix, Illumina [12653804] (imputed)	N	glomerular filtration rate	http://purl.obolibrary.org/obo/OBA_0003747	GCST90100220	Genome-wide genotyping array
	2022-09-01	31882771	Al-Khelaifi F	2019-12-27	Sci Rep	www.ncbi.nlm.nih.gov/pubmed/31882771	Metabolic GWAS of elite athletes reveals novel genetically-influenced metabolites associated with athletic performance.	2-pyrrolidinone levels in elite athletes	490 individuals	NA	10q21.1	10	52300341		PRKG1-AS1			ENSG00000236671			rs11815205-?	rs11815205	0	11815205	intergenic_variant	0	NR	7e-06	5.1549		0.411326	[0.23-0.59] unit increase	Illumina [275016]	N	amino acid measurement	http://www.ebi.ac.uk/efo/EFO_0005134	GCST90133524	Genome-wide genotyping array
	2022-03-07	34910505	van der Meer D	2021-12-15	Sci Adv	www.ncbi.nlm.nih.gov/pubmed/34910505	The genetic architecture of human cortical folding.	Vertex-wise cortical surface area	33,748 European ancestry individuals	NA	10q11.23	10	50974681		MIX23P2 - PRKG1	ENSG00000236944	ENSG00000185532		11323	16207	rs10995206-A	rs10995206	0	10995206	intergenic_variant	1	0.32	3e-08	7.52288		5.55	z score increase	Affymetrix [9061022] (imputed)	N	cerebral cortex area attribute	http://purl.obolibrary.org/obo/OBA_2045267	GCST90095130	Genome-wide genotyping array
	2023-12-12	36914875	Shrine N	2023-03-13	Nat Genet	www.ncbi.nlm.nih.gov/pubmed/36914875	Multi-ancestry genome-wide association analyses improve resolution of genes and pathways influencing lung function and chronic obstructive pulmonary disease risk.	Lung function (FEV1)	475,645 European ancestry individuals, 8,590 African ancestry individuals, 85,279 East Asian ancestry individuals, 4,270 South Asian ancestry individuals, 14,668 Hispanic or Latin American individuals	NA	10q11.23	10	50978258		MIX23P2 - PRKG1	ENSG00000236944	ENSG00000185532		14900	12630	rs2456758-A	rs2456758	0	2456758	intergenic_variant	1	0.115	2e-10	9.69897		6.383	z score decrease	Affymetrix, Illumina [63380712] (imputed)	N	forced expiratory volume	http://www.ebi.ac.uk/efo/EFO_0004314	GCST90244092	Genome-wide genotyping array
	2022-09-27	35396580	Trubetskoy V	2022-04-08	Nature	www.ncbi.nlm.nih.gov/pubmed/35396580	Mapping genomic loci implicates genes and synaptic biology in schizophrenia.	Schizophrenia	53,386 European ancestry cases, 77,258 European ancestry controls, 14,004 East Asian ancestry cases, 16,757 East Asian ancestry controls, 6,152 African American cases, 3,918 African American controls, 1,234 Latino cases, 3,090 Latino controls	1,979 European ancestry cases, 142,626 European ancestry controls	10q21.1	10	52303323		PRKG1-AS1			ENSG00000236671			rs12771371-G	rs12771371	0	12771371	intergenic_variant	0	0.74	3e-07	6.52288		1.0431	[1.03-1.06]	Affymetrix [7585078] (imputed)	N	schizophrenia	http://purl.obolibrary.org/obo/MONDO_0005090	GCST90128471	Genome-wide genotyping array
	2023-02-09	36224396	Yengo L	2022-10-12	Nature	www.ncbi.nlm.nih.gov/pubmed/36224396	A saturated map of common genetic variants associated with human height.	Height	5,314,291 European ancestry, Hispanic or Latin American, East Asian ancestry, African ancestry, South Asian ancestry individuals	NA	10q11.23	10	50972159		MIX23P2 - PRKG1	ENSG00000236944	ENSG00000185532		8801	18729	rs7096841-T	rs7096841	0	7096841	intergenic_variant	1	0.0334	3e-44	43.5229		0.0255	[0.022-0.029] unit increase	Affymetrix, Illumina [1385132] (imputed)	N	body height	http://purl.obolibrary.org/obo/OBA_VT0001253	GCST90245848	Genome-wide genotyping array
	2023-02-09	36224396	Yengo L	2022-10-12	Nature	www.ncbi.nlm.nih.gov/pubmed/36224396	A saturated map of common genetic variants associated with human height.	Height	5,314,291 European ancestry, Hispanic or Latin American, East Asian ancestry, African ancestry, South Asian ancestry individuals	NA	10q11.23	10	50987863		MIX23P2 - PRKG1	ENSG00000236944	ENSG00000185532		24505	3025	rs6479835-T	rs6479835	0	6479835	intergenic_variant	1	0.3399	1e-75	75		0.012	[0.011-0.013] unit increase	Affymetrix, Illumina [1385132] (imputed)	N	body height	http://purl.obolibrary.org/obo/OBA_VT0001253	GCST90245848	Genome-wide genotyping array
	2020-07-28	32450446	Wang H	2020-04-29	Neurobiol Aging	www.ncbi.nlm.nih.gov/pubmed/32450446	Genome-wide interaction analysis of pathological hallmarks in Alzheimer's disease.	Total PHF-tau (SNP x SNP interaction)	1,285 individuals	NA	10q21.1 x 8p23.1	10 x 8	52227002 x 6597563	NR x NR	PRKG1-AS1, PRKG1 x MCPH1						rs7909343-? x rs17631156-?	rs7909343 x rs17631156	0		intron_variant x intron_variant		NR	1e-08	8				Affymetrix, Illumina [279409] (imputed)	N	PHF-tau measurement	http://www.ebi.ac.uk/efo/EFO_0010750	GCST010340	Genome-wide genotyping array
	2020-07-28	32450446	Wang H	2020-04-29	Neurobiol Aging	www.ncbi.nlm.nih.gov/pubmed/32450446	Genome-wide interaction analysis of pathological hallmarks in Alzheimer's disease.	Total PHF-tau (SNP x SNP interaction)	1,285 individuals	NA	14q23.1 x 10q21.1	14 x 10	58790173 x 51472348	NR x NR	LINC01500 x PRKG1						rs413584-? x rs10823056-?	rs413584 x rs10823056	0		intergenic_variant x intron_variant		NR	3e-09	8.52288				Affymetrix, Illumina [279409] (imputed)	N	PHF-tau measurement	http://www.ebi.ac.uk/efo/EFO_0010750	GCST010340	Genome-wide genotyping array
	2015-02-20	24939585	Fransen E	2014-06-18	Eur J Hum Genet	www.ncbi.nlm.nih.gov/pubmed/24939585	Genome-wide association analysis demonstrates the highly polygenic character of age-related hearing impairment.	Age-related hearing impairment (SNP x SNP interaction)	1,489 European ancestry individuals	NA	10q21.1 x 12q24.31	10 x 12	52010479 x 120627474	NR x NR	PRKG1 x RPL11P5 - CABP1-DT						rs1903989-? x rs4767920-?	rs1903989 x rs4767920	0		intron_variant x intergenic_variant		NR	1e-09	9				Illumina [629437] (imputed)	N	age-related hearing impairment	http://www.ebi.ac.uk/efo/EFO_0005782	GCST002487	Genome-wide genotyping array
Yes	2021-10-26	34107879	Hu Y	2021-06-09	BMC Genomics	www.ncbi.nlm.nih.gov/pubmed/34107879	Multi-ethnic genome-wide association analyses of white blood cell and platelet traits in the Population Architecture using Genomics and Epidemiology (PAGE) study.	White blood cell count	21,347 Hispanic or Latin American individuals	NA	1q23.3	1	163075959		RGS4			ENSG00000117152			rs67187358-G	rs67187358	0	67187358	3_prime_UTR_variant	0	0.085	8e-09	8.09691		0.113	[0.075-0.151] unit decrease	Affymetrix, Illumina [NR] (imputed)	N	leukocyte quantity	http://purl.obolibrary.org/obo/OBA_VT0000217	GCST90026511	Genome-wide genotyping array
Yes	2021-10-26	34107879	Hu Y	2021-06-09	BMC Genomics	www.ncbi.nlm.nih.gov/pubmed/34107879	Multi-ethnic genome-wide association analyses of white blood cell and platelet traits in the Population Architecture using Genomics and Epidemiology (PAGE) study.	White blood cell count	16,201 African American or Afro-Caribbean individuals	NA	1q23.3	1	163075959		RGS4			ENSG00000117152			rs67187358-G	rs67187358	0	67187358	3_prime_UTR_variant	0	0.3858	2e-49	48.699		0.1811	[0.16-0.21] unit decrease	Affymetrix, Illumina [NR] (imputed)	N	leukocyte quantity	http://purl.obolibrary.org/obo/OBA_VT0000217	GCST90026503	Genome-wide genotyping array
Yes	2021-10-26	34107879	Hu Y	2021-06-09	BMC Genomics	www.ncbi.nlm.nih.gov/pubmed/34107879	Multi-ethnic genome-wide association analyses of white blood cell and platelet traits in the Population Architecture using Genomics and Epidemiology (PAGE) study.	White blood cell count (monocyte)	16,201 African American or Afro-Caribbean individuals	NA	1q23.3	1	163075959		RGS4			ENSG00000117152			rs67187358-G	rs67187358	0	67187358	3_prime_UTR_variant	0	0.3922	5e-09	8.30103		0.1019	[0.068-0.136] unit decrease	Affymetrix, Illumina [NR] (imputed)	N	monocyte count	http://www.ebi.ac.uk/efo/EFO_0005091	GCST90026507	Genome-wide genotyping array
	2022-03-10	34732054	Yang Y	2021-11-04	Circ Genom Precis Med	www.ncbi.nlm.nih.gov/pubmed/34732054	Identification of Functional Genetic Determinants of Cardiac Troponin T and I in a Multiethnic Population and Causal Associations With Atrial Fibrillation.	High-sensitivity cardiac troponin I concentration	12,730 European ancestry individuals	NA	1q23.3	1	163069063		RGS4			ENSG00000117152			rs10917671-?	rs10917671	0	10917671	intron_variant	0	NR	9e-06	5.04576		0.05	[0.026-0.074] unit increase	Affymetrix, Illumina [NR] (imputed)	N	cardiac troponin I measurement	http://www.ebi.ac.uk/efo/EFO_0010071	GCST90095175	Genome-wide genotyping array
	2019-02-08	30595370	Kichaev G	2018-12-27	Am J Hum Genet	www.ncbi.nlm.nih.gov/pubmed/30595370	Leveraging Polygenic Functional Enrichment to Improve GWAS Power.	Menarche (age at onset)	approximately 242,000 European ancestry individuals	NA	1q23.3	1	162923134		CCDC190 - RGS4	ENSG00000185860	ENSG00000117152		54373	145641	rs2343506-?	rs2343506	0	2343506	intergenic_variant	1	NR	2e-10	9.69897				NR [~ 8900000] (imputed)	N	age at menarche	http://www.ebi.ac.uk/efo/EFO_0004703	GCST007078	Genome-wide genotyping array
	2014-03-15	24009623	Jiang J	2013-08-30	Front Genet	www.ncbi.nlm.nih.gov/pubmed/24009623	Genome-wide association study for biomarker identification of Rapamycin and Everolimus using a lymphoblastoid cell line system.	Response to mTOR inhibitor (rapamycin)	87 European ancestry individuals, 91 African American individuals, 94 Han Chinese ancestry individuals	NA	1q23.3	1	163083499	RGS4, RGS5	RGS4 - RGS5	ENSG00000117152	ENSG00000143248		6697	27622	rs2063142-?	rs2063142	0	2063142	intergenic_variant	1	NR	4e-06	5.39794		0.29	[NR] unit decrease	Affymetrix, Illumina [1348798]	N	response to mTOR inhibitor	http://www.ebi.ac.uk/efo/EFO_0005417	GCST002156	Genome-wide genotyping array
	2016-04-23	22550155	Edelstein LC	2012-05-01	Circulation	www.ncbi.nlm.nih.gov/pubmed/22550155	Human genome-wide association and mouse knockout approaches identify platelet supervillin as an inhibitor of thrombus formation under shear stress.	Platelet thrombus formation	125 European ancestry individuals, 116 African American individuals	NA	1q23.3	1	163105231	intergenic	RGS4 - RGS5	ENSG00000117152	ENSG00000143248		28429	5890	rs1507740-?	rs1507740	0	1507740	intergenic_variant	1	NR	5e-06	5.30103	(AA)	0.013215	[0.0076-0.0189] unit increase	Illumina [at least 620901]	N	blood clotting level, platelet reactivity efficacy	http://purl.obolibrary.org/obo/OBA_2045225, http://purl.obolibrary.org/obo/OBA_2045287	GCST001501	Genome-wide genotyping array
	2021-09-29	34031191	Kumar A	2021-05-24	Neurology	www.ncbi.nlm.nih.gov/pubmed/34031191	Association of SUMOlation Pathway Genes With Stroke in a Genome-wide Association Study in India.	Ischemic stroke (cardioembolic)	174 Indian ancestry cases, 2,154 Indian ancestry controls	NA	1q23.3	1	163087568		RGS4 - RGS5	ENSG00000117152	ENSG00000143248		10766	23553	rs79820282-?	rs79820282	0	79820282	intergenic_variant	1	NR	6e-06	5.22185		1.09784	[1.05447343050396-1.1429953883308]	Illumina [up to 7827597] (imputed)	N	cardioembolic stroke	http://www.ebi.ac.uk/efo/EFO_1001976	GCST90020242	Genome-wide genotyping array
	2021-06-29	33462484	Sinnott-Armstrong N	2021-01-18	Nat Genet	www.ncbi.nlm.nih.gov/pubmed/33462484	Genetics of 35 blood and urine biomarkers in the UK Biobank.	Insulin-like growth factor 1 levels	340,567 European ancestry individuals, 5,974 African ancestry individuals, 7,283 South Asian ancestry individuals	NA	1q23.3	1	163057476	NR	CCDC190 - RGS4	ENSG00000185860	ENSG00000117152		188715	11299	rs77369503-A	rs77369503	0	77369503	intergenic_variant	1	NR	9e-12	11.0458		0.0462	[0.033-0.06] unit decrease	Affymetrix [9000000] (imputed)	N	IGF-1 measurement	http://www.ebi.ac.uk/efo/EFO_0004627	GCST90019511	Genome-wide genotyping array
	2021-09-02	33654129	Jung HU	2021-03-02	Sci Rep	www.ncbi.nlm.nih.gov/pubmed/33654129	Identification of genetic loci affecting body mass index through interaction with multiple environmental factors using structured linear mixed model.	BMI x environmental factors (excluding physical activity) interaction	8,155 Korean ancestry individuals	NA	1q23.3	1	162956470	C1orf110	CCDC190 - RGS4	ENSG00000185860	ENSG00000117152		87709	112305	rs12405096-?	rs12405096	0	12405096	intergenic_variant	1	NR	5e-07	6.30103				Affymetrix [5908111] (imputed)	N	household income, smoking status measurement, educational attainment, protein intake measurement, carbohydrate intake measurement, alcohol consumption quality, body mass index, energy intake measurement	http://www.ebi.ac.uk/efo/EFO_0009695, http://www.ebi.ac.uk/efo/EFO_0006527, http://www.ebi.ac.uk/efo/EFO_0011015, http://www.ebi.ac.uk/efo/EFO_0010810, http://www.ebi.ac.uk/efo/EFO_0010811, http://purl.obolibrary.org/obo/OBA_1000840, http://www.ebi.ac.uk/efo/EFO_0004340, http://www.ebi.ac.uk/efo/EFO_0009374	GCST012282	Genome-wide genotyping array
	2021-04-15	33568662	Dashti HS	2021-02-10	Nat Commun	www.ncbi.nlm.nih.gov/pubmed/33568662	Genetic determinants of daytime napping and effects on cardiometabolic health.	Daytime nap	452,633 European ancestry individuals	541,333 European ancestry individuals	1q23.3	1	162906410	CCDC190, RGS4	CCDC190 - RGS4	ENSG00000185860	ENSG00000117152		37649	162365	rs12031519-A	rs12031519	0	12031519	intergenic_variant	1	NR	3e-07	6.52288		0.0069	[0.0042-0.0096] unit increase	Affymetrix [13304133] (imputed)	N	daytime rest measurement	http://www.ebi.ac.uk/efo/EFO_0007828	GCST011494	Genome-wide genotyping array
	2023-10-06	37196047	Joo YY	2023-05-17	PLoS One	www.ncbi.nlm.nih.gov/pubmed/37196047	Multi-ancestry genome- and phenome-wide association studies of diverticular disease in electronic health records with natural language processing enriched phenotyping algorithm.	Diverticulitis	up to 2,322 African ancestry individuals	NA	1q23.3	1	162910977		CCDC190 - RGS4	ENSG00000185860	ENSG00000117152		42216	157798	rs4657237-C	rs4657237	0	4657237	intergenic_variant	1	0.415	3e-07	6.52288		2.46	[2.11-2.81]	Affymetrix, Illumina [9848164] (imputed)	N	diverticulitis	http://purl.obolibrary.org/obo/MONDO_0004235	GCST90293098	Genome-wide genotyping array
Yes	2025-03-26	36810956	Foss-Skiftesvik J	2023-02-22	Neuro Oncol	www.ncbi.nlm.nih.gov/pubmed/36810956	Multi-ancestry genome-wide association study of 4,069 children with glioma identifies 9p21.3 risk locus.	Oligodendroglioma	90 European ancestry cases, 7,183 European ancestry controls, 28 Hispanic or Latin American cases, 1,177 Hispanic or Latin American controls, 6 African American or Afro-Caribbean cases, 196 African American or Afro-Caribbean controls, 6 African ancestry cases, 196 African ancestry controls, 2 Asian ancestry cases, 222 Asian ancestry controls	NA	1q23.3	1	162974521		CCDC190 - RGS4	ENSG00000185860	ENSG00000117152		105760	94254	rs16847290-?	rs16847290	0	16847290	intergenic_variant	1	NR	2e-06	5.69897		3.21588	[1.991483822-5.193043804]	Affymetrix, Illumina [11212017] (imputed)	N	oligodendroglioma	http://www.ebi.ac.uk/efo/EFO_0000632	GCST90296472	Genome-wide genotyping array
	2024-03-28	37500982	He D	2023-07-27	Osteoporos Int	www.ncbi.nlm.nih.gov/pubmed/37500982	A longitudinal genome-wide association study of bone mineral density mean and variability in the UK Biobank.	Bone mineral density mean	5,862 South Asian ancestry individuals	NA	1q23.3	1	162944847		CCDC190 - RGS4	ENSG00000185860	ENSG00000117152		76086	123928	rs76676410-?	rs76676410	0	76676410	intergenic_variant	1	NR	8e-307	306.097				NR [NR] (imputed)	N	bone density	http://purl.obolibrary.org/obo/OBA_1000110	GCST90321120	Genome-wide genotyping array
	2022-09-28	34282934	Fan W	2021-07-20	mSystems	www.ncbi.nlm.nih.gov/pubmed/34282934	Association between Human Genetic Variants and the Vaginal Bacteriome of Pregnant Women.	Vaginal microbiome MetaCyc pathway (COMPLETE-ARO-PWY|superpathway of aromatic amino acid biosynthesis)	315 Chinese ancestry individuals	NA	1q23.3	1	163025565		CCDC190 - RGS4	ENSG00000185860	ENSG00000117152		156804	43210	rs1507746-A	rs1507746	0	1507746	intergenic_variant	1	NR	7e-06	5.1549		0.8483	[0.48-1.21] unit increase	Illumina [492582]	N	vaginal microbiome measurement	http://www.ebi.ac.uk/efo/EFO_0011013	GCST90026722	Genome-wide genotyping array
	2022-09-28	34282934	Fan W	2021-07-20	mSystems	www.ncbi.nlm.nih.gov/pubmed/34282934	Association between Human Genetic Variants and the Vaginal Bacteriome of Pregnant Women.	Vaginal microbiome MetaCyc pathway (NONMEVIPP-PWY|methylerythritol phosphate pathway I)	315 Chinese ancestry individuals	NA	1q23.3	1	163025565		CCDC190 - RGS4	ENSG00000185860	ENSG00000117152		156804	43210	rs1507746-A	rs1507746	0	1507746	intergenic_variant	1	NR	8e-06	5.09691		0.8375	[0.48-1.2] unit increase	Illumina [492582]	N	vaginal microbiome measurement	http://www.ebi.ac.uk/efo/EFO_0011013	GCST90026757	Genome-wide genotyping array
	2022-09-28	34282934	Fan W	2021-07-20	mSystems	www.ncbi.nlm.nih.gov/pubmed/34282934	Association between Human Genetic Variants and the Vaginal Bacteriome of Pregnant Women.	Vaginal microbiome MetaCyc pathway (PWY-5104|L-isoleucine biosynthesis IV)	315 Chinese ancestry individuals	NA	1q23.3	1	163025565		CCDC190 - RGS4	ENSG00000185860	ENSG00000117152		156804	43210	rs1507746-A	rs1507746	0	1507746	intergenic_variant	1	NR	1e-05	5		0.825	[0.47-1.18] unit increase	Illumina [492582]	N	vaginal microbiome measurement	http://www.ebi.ac.uk/efo/EFO_0011013	GCST90026800	Genome-wide genotyping array
	2022-09-28	34282934	Fan W	2021-07-20	mSystems	www.ncbi.nlm.nih.gov/pubmed/34282934	Association between Human Genetic Variants and the Vaginal Bacteriome of Pregnant Women.	Vaginal microbiome MetaCyc pathway (PWY-5121|superpathway of geranylgeranyl diphosphate biosynthesis II (via MEP))	315 Chinese ancestry individuals	NA	1q23.3	1	163025565		CCDC190 - RGS4	ENSG00000185860	ENSG00000117152		156804	43210	rs1507746-A	rs1507746	0	1507746	intergenic_variant	1	NR	4e-06	5.39794		0.8723	[0.51-1.23] unit increase	Illumina [492582]	N	vaginal microbiome measurement	http://www.ebi.ac.uk/efo/EFO_0011013	GCST90026801	Genome-wide genotyping array
	2022-09-28	34282934	Fan W	2021-07-20	mSystems	www.ncbi.nlm.nih.gov/pubmed/34282934	Association between Human Genetic Variants and the Vaginal Bacteriome of Pregnant Women.	Vaginal microbiome relative abundance (c_Clostridia)	315 Chinese ancestry individuals	NA	1q23.3	1	163025565		CCDC190 - RGS4	ENSG00000185860	ENSG00000117152		156804	43210	rs1507746-A	rs1507746	0	1507746	intergenic_variant	1	NR	1e-06	6		0.8215	[0.5-1.15] unit increase	Illumina [492582]	N	vaginal microbiome measurement	http://www.ebi.ac.uk/efo/EFO_0011013	GCST90026987	Genome-wide genotyping array
	2022-09-28	34282934	Fan W	2021-07-20	mSystems	www.ncbi.nlm.nih.gov/pubmed/34282934	Association between Human Genetic Variants and the Vaginal Bacteriome of Pregnant Women.	Vaginal microbiome MetaCyc pathway (ASPASN-PWY|superpathway of L-aspartate and L-asparagine biosynthesis)	315 Chinese ancestry individuals	NA	1q23.3	1	163025565		CCDC190 - RGS4	ENSG00000185860	ENSG00000117152		156804	43210	rs1507746-A	rs1507746	0	1507746	intergenic_variant	1	NR	9e-06	5.04576		0.8445	[0.48-1.21] unit increase	Illumina [492582]	N	vaginal microbiome measurement	http://www.ebi.ac.uk/efo/EFO_0011013	GCST90026713	Genome-wide genotyping array
	2022-09-28	34282934	Fan W	2021-07-20	mSystems	www.ncbi.nlm.nih.gov/pubmed/34282934	Association between Human Genetic Variants and the Vaginal Bacteriome of Pregnant Women.	Vaginal microbiome MetaCyc pathway (PANTO-PWY|phosphopantothenate biosynthesis I)	315 Chinese ancestry individuals	NA	1q23.3	1	163025565		CCDC190 - RGS4	ENSG00000185860	ENSG00000117152		156804	43210	rs1507746-A	rs1507746	0	1507746	intergenic_variant	1	NR	8e-06	5.09691		0.8465	[0.48-1.21] unit increase	Illumina [492582]	N	vaginal microbiome measurement	http://www.ebi.ac.uk/efo/EFO_0011013	GCST90026775	Genome-wide genotyping array
	2022-09-28	34282934	Fan W	2021-07-20	mSystems	www.ncbi.nlm.nih.gov/pubmed/34282934	Association between Human Genetic Variants and the Vaginal Bacteriome of Pregnant Women.	Vaginal microbiome MetaCyc pathway (PWY-7560|methylerythritol phosphate pathway II)	315 Chinese ancestry individuals	NA	1q23.3	1	163025565		CCDC190 - RGS4	ENSG00000185860	ENSG00000117152		156804	43210	rs1507746-A	rs1507746	0	1507746	intergenic_variant	1	NR	3e-06	5.52288		0.8844	[0.52-1.25] unit increase	Illumina [492582]	N	vaginal microbiome measurement	http://www.ebi.ac.uk/efo/EFO_0011013	GCST90026934	Genome-wide genotyping array
	2022-09-28	34282934	Fan W	2021-07-20	mSystems	www.ncbi.nlm.nih.gov/pubmed/34282934	Association between Human Genetic Variants and the Vaginal Bacteriome of Pregnant Women.	Vaginal microbiome MetaCyc pathway (PWY-922|mevalonate pathway I)	315 Chinese ancestry individuals	NA	1q23.3	1	163025565		CCDC190 - RGS4	ENSG00000185860	ENSG00000117152		156804	43210	rs1507746-A	rs1507746	0	1507746	intergenic_variant	1	NR	9e-06	5.04576		0.843	[0.48-1.21] unit decrease	Illumina [492582]	N	vaginal microbiome measurement	http://www.ebi.ac.uk/efo/EFO_0011013	GCST90026938	Genome-wide genotyping array
	2022-09-28	34282934	Fan W	2021-07-20	mSystems	www.ncbi.nlm.nih.gov/pubmed/34282934	Association between Human Genetic Variants and the Vaginal Bacteriome of Pregnant Women.	Vaginal microbiome MetaCyc pathway (TRPSYN-PWY|L-tryptophan biosynthesis)	315 Chinese ancestry individuals	NA	1q23.3	1	163025565		CCDC190 - RGS4	ENSG00000185860	ENSG00000117152		156804	43210	rs1507746-A	rs1507746	0	1507746	intergenic_variant	1	NR	8e-06	5.09691		0.8288	[0.47-1.19] unit increase	Illumina [492582]	N	vaginal microbiome measurement	http://www.ebi.ac.uk/efo/EFO_0011013	GCST90026978	Genome-wide genotyping array
Yes	2022-12-12	34925446	Soremekun O	2021-12-02	Front Genet	www.ncbi.nlm.nih.gov/pubmed/34925446	Genome-Wide Association and Mendelian Randomization Analysis Reveal the Causal Relationship Between White Blood Cell Subtypes and Asthma in Africans.	Neutrophil count	16,147 African ancestry individuals	NA	1q23.3	1	162910029		CCDC190 - RGS4	ENSG00000185860	ENSG00000117152		41268	158746	rs2880640-?	rs2880640	0	2880640	intergenic_variant	1	NR	1e-41	41		0.34132	[0.29-0.39] unit decrease	Affymetrix, Illumina [NR] (imputed)	N	neutrophil count	http://www.ebi.ac.uk/efo/EFO_0004833	GCST90101731	Genome-wide genotyping array
Yes	2022-12-12	34925446	Soremekun O	2021-12-02	Front Genet	www.ncbi.nlm.nih.gov/pubmed/34925446	Genome-Wide Association and Mendelian Randomization Analysis Reveal the Causal Relationship Between White Blood Cell Subtypes and Asthma in Africans.	White blood cell count	17,802 African ancestry individuals	NA	1q23.3	1	163079698		RGS4 - RGS5	ENSG00000117152	ENSG00000143248		2896	31423	rs12047906-?	rs12047906	0	12047906	intergenic_variant	1	NR	8e-19	18.0969		0.260092	[0.2-0.32] unit decrease	Affymetrix, Illumina [NR] (imputed)	N	leukocyte quantity	http://purl.obolibrary.org/obo/OBA_VT0000217	GCST90101726	Genome-wide genotyping array
	2025-01-06	39024449	Verma A	2024-07-19	Science	www.ncbi.nlm.nih.gov/pubmed/39024449	Diversity and scale: Genetic architecture of 2068 traits in the VA Million Veteran Program.	Traumatic cataract (PheCode 366.3)	365 African American or Afro-Caribbean cases, 121,198 African American or Afro-Caribbean controls, 627 European ancestry cases, 449,823 European ancestry controls	NA	1q23.3	1	162972725		CCDC190 - RGS4	ENSG00000185860	ENSG00000117152		103964	96050	rs182737510-C	rs182737510	0	182737510	intergenic_variant	1	0.9981	2e-11	10.699		2.172	[2.12-2.23] unit decrease	NR [44300000] (imputed)	N	trauma complication, cataract	http://www.ebi.ac.uk/efo/EFO_0009888, http://purl.obolibrary.org/obo/MONDO_0005129	GCST90480072	Genome-wide genotyping array
	2020-07-28	32450446	Wang H	2020-04-29	Neurobiol Aging	www.ncbi.nlm.nih.gov/pubmed/32450446	Genome-wide interaction analysis of pathological hallmarks in Alzheimer's disease.	Neurofibrillary tangles (SNP x SNP interaction)	1,316 individuals	NA	1q23.3 x 11q12.2	1 x 11	162881966 x 60829177	NR x NR	CCDC190 - RGS4 x MS4A10 - CCDC86-AS1						rs12735998-? x rs4938984-?	rs12735998 x rs4938984	0		intergenic_variant x intergenic_variant		NR	1e-14	14				Affymetrix, Illumina [279409] (imputed)	N	neurofibrillary tangles measurement	http://www.ebi.ac.uk/efo/EFO_0006797	GCST010343	Genome-wide genotyping array
	2016-07-23	26198764	Goes FS	2015-07-21	Am J Med Genet B Neuropsychiatr Genet	www.ncbi.nlm.nih.gov/pubmed/26198764	Genome-wide association study of schizophrenia in Ashkenazi Jews.	Schizophrenia	1,505 Ashkenazi Jewish founder cases, 2,553 Ashkenazi Jewish founder controls	NA	22q11.21	22	19960814	NR	COMT			ENSG00000093010			rs4646312-C	rs4646312	0	4646312	intron_variant	0	NR	8e-06	5.09691		1.25	[NR]	Illumina [up to 9792010] (imputed)	N	schizophrenia	http://purl.obolibrary.org/obo/MONDO_0005090	GCST003050	Genome-wide genotyping array
	2019-07-12	31164008	Mullins N	2019-06-05	Am J Psychiatry	www.ncbi.nlm.nih.gov/pubmed/31164008	GWAS of Suicide Attempt in Psychiatric Disorders and Association With Major Depression Polygenic Risk Scores.	Suicide attempts in bipolar disorder	3,264 European ancestry attempters, 5,500 European ancestry nonattempters	NA	22q11.21	22	19965038	NR	COMT			ENSG00000093010			rs165774-A	rs165774	0	165774	intron_variant	0	0.33	9e-06	5.04576		1.18	1.1-1.27	NR [8807005] (imputed)	N	attempted suicide	http://www.ebi.ac.uk/efo/EFO_0004321	GCST008119	Genome-wide genotyping array
	2019-02-06	30595370	Kichaev G	2018-12-27	Am J Hum Genet	www.ncbi.nlm.nih.gov/pubmed/30595370	Leveraging Polygenic Functional Enrichment to Improve GWAS Power.	Body mass index	approximately 458,000 European ancestry individuals	NA	22q11.21	22	19961490		COMT			ENSG00000093010			rs165722-?	rs165722	0	165722	intron_variant	0	NR	5e-09	8.30103				NR [~ 8900000] (imputed)	N	body mass index	http://www.ebi.ac.uk/efo/EFO_0004340	GCST007039	Genome-wide genotyping array
	2018-10-18	29912962	Feitosa MF	2018-06-18	PLoS One	www.ncbi.nlm.nih.gov/pubmed/29912962	Novel genetic associations for blood pressure identified via gene-alcohol interaction in up to 570K individuals across multiple ancestries.	Systolic blood pressure x alcohol consumption interaction (2df test)	63,608 European ancestry drinkers, 10,193 African American or Afro-Caribbean heavy drinkers, 2,441 Asian ancestry drinkers, 5,084 Hispanic or Latin American drinkers, 27,494 European ancestry non-drinkers, 11,224 African American or Afro-Caribbean non-drinkers, 9,924 Asian ancestry non-drinkers, 3,387 Hispanic or Latin American non-drinkers	238,002 European ancestry drinkers, 2,280 African American drinkers, 54,081 Asian ancestry drinkers, 6,452 Hispanic drinkers, 43,316 European ancestry non-drinkers, 2,761 African American non-drinkers, 86,945 Asian ancestry non-drinkers, 6,925 Hispanic non-drinkers	22q11.21	22	19968491	ARVCF, COMT	COMT			ENSG00000093010			rs117222687-C	rs117222687	0	117222687	3_prime_UTR_variant	0	0.02	3e-08	7.52288	(AA)			Affymetrix, Illumina [up to 39321347] (imputed)	N	systolic blood pressure, alcohol drinking	http://www.ebi.ac.uk/efo/EFO_0006335, http://www.ebi.ac.uk/efo/EFO_0004329	GCST006434	Genome-wide genotyping array
	2020-03-05	31959995	Schlosser P	2020-01-20	Nat Genet	www.ncbi.nlm.nih.gov/pubmed/31959995	Genetic studies of urinary metabolites illuminate mechanisms of detoxification and excretion in humans.	Urinary metabolite modules (eigenmetabolites) in chronic kidney disease	1,221 cases	406 cases	22q11.21	22	19963748	COMT	COMT			ENSG00000093010			rs4680-G	rs4680	0	4680	missense_variant	0	0.5	5e-54	53.301	(X-12708, X-21785)	0.012	[0.01-0.014] unit increase	Illumina [7750367] (imputed)	N	urinary metabolite measurement	http://www.ebi.ac.uk/efo/EFO_0005116	GCST009735	Genome-wide genotyping array
	2020-03-03	31959995	Schlosser P	2020-01-20	Nat Genet	www.ncbi.nlm.nih.gov/pubmed/31959995	Genetic studies of urinary metabolites illuminate mechanisms of detoxification and excretion in humans.	Urinary metabolite levels in chronic kidney disease	1,221 cases	406 cases	22q11.21	22	19963748	COMT	COMT			ENSG00000093010			rs4680-G	rs4680	0	4680	missense_variant	0	0.5	2e-59	58.699	(X - 21785)	0.221	[0.19-0.25] unit increase	Illumina [7750367] (imputed)	N	urinary metabolite measurement	http://www.ebi.ac.uk/efo/EFO_0005116	GCST009733	Genome-wide genotyping array
	2020-03-03	31959995	Schlosser P	2020-01-20	Nat Genet	www.ncbi.nlm.nih.gov/pubmed/31959995	Genetic studies of urinary metabolites illuminate mechanisms of detoxification and excretion in humans.	Urinary metabolite levels in chronic kidney disease	1,221 cases	406 cases	22q11.21	22	19963748	COMT	COMT			ENSG00000093010			rs4680-G	rs4680	0	4680	missense_variant	0	0.5	2e-11	10.699	(X - 12707)	0.163	[0.12-0.21] unit decrease	Illumina [7750367] (imputed)	N	urinary metabolite measurement	http://www.ebi.ac.uk/efo/EFO_0005116	GCST009733	Genome-wide genotyping array
	2020-03-03	31959995	Schlosser P	2020-01-20	Nat Genet	www.ncbi.nlm.nih.gov/pubmed/31959995	Genetic studies of urinary metabolites illuminate mechanisms of detoxification and excretion in humans.	Urinary metabolite levels in chronic kidney disease	1,221 cases	406 cases	22q11.21	22	19963748	COMT	COMT			ENSG00000093010			rs4680-G	rs4680	0	4680	missense_variant	0	0.5	2e-28	27.699	(X - 12708)	0.228	[0.19-0.27] unit increase	Illumina [7750367] (imputed)	N	urinary metabolite measurement	http://www.ebi.ac.uk/efo/EFO_0005116	GCST009733	Genome-wide genotyping array
	2019-02-08	30595370	Kichaev G	2018-12-27	Am J Hum Genet	www.ncbi.nlm.nih.gov/pubmed/30595370	Leveraging Polygenic Functional Enrichment to Improve GWAS Power.	Hair color	approximately 452,000 European ancestry individuals	NA	22q11.21	22	19965536		COMT			ENSG00000093010			rs165895-?	rs165895	0	165895	intron_variant	0	NR	6e-15	14.2218				NR [~ 8900000] (imputed)	N	strand of hair color	http://purl.obolibrary.org/obo/OBA_0002313	GCST007082	Genome-wide genotyping array
	2018-09-12	23093944	Krumsiek J	2012-10-18	PLoS Genet	www.ncbi.nlm.nih.gov/pubmed/23093944	Mining the unknown: a systems approach to metabolite identification combining genetic and metabolic information.	Serum metabolite levels	1,678 European ancestry individuals	NA	22q11.21	22	19963748	COMT	COMT			ENSG00000093010			rs4680-?	rs4680	0	4680	missense_variant	0	NR	6e-11	10.2218	(X-01911)	0.07037	[NR] unit increase	Affymetrix [655658]	N	serum metabolite measurement	http://www.ebi.ac.uk/efo/EFO_0005653	GCST006249	Genome-wide genotyping array
	2018-09-12	23093944	Krumsiek J	2012-10-18	PLoS Genet	www.ncbi.nlm.nih.gov/pubmed/23093944	Mining the unknown: a systems approach to metabolite identification combining genetic and metabolic information.	Serum metabolite levels	1,678 European ancestry individuals	NA	22q11.21	22	19963748	COMT	COMT			ENSG00000093010			rs4680-?	rs4680	0	4680	missense_variant	0	NR	1e-48	48	(X-11593)	0.04945	[NR] unit increase	Affymetrix [655658]	N	serum metabolite measurement	http://www.ebi.ac.uk/efo/EFO_0005653	GCST006249	Genome-wide genotyping array
	2018-09-20	30019117	Liu J	2018-07-17	Hum Genet	www.ncbi.nlm.nih.gov/pubmed/30019117	The coexistence of copy number variations (CNVs) and single nucleotide polymorphisms (SNPs) at a locus can result in distorted calculations of the significance in associating SNPs to disease.	Adolescent idiopathic scoliosis	196 cases, 303 controls	NA	22q11.21	22	19968169	NR	COMT			ENSG00000093010			rs9332377-?	rs9332377	0	9332377	3_prime_UTR_variant	0	NR	2e-06	5.69897				Affymetrix [NR]	N	adolescent idiopathic scoliosis	http://www.ebi.ac.uk/efo/EFO_0005423	GCST006287	Genome-wide genotyping array
	2024-10-18	39349817	Park S	2024-09-30	Nat Genet	www.ncbi.nlm.nih.gov/pubmed/39349817	Multivariate genomic analysis of 5‚Äâmillion people elucidates the genetic architecture of shared components of the metabolic syndrome.	Metabolic syndrome	1,384,348 European ancestry individuals	NA	22q11.21	22	19962712		COMT			ENSG00000093010			rs4633-?	rs4633	0	4633	synonymous_variant	0	NR	9e-15	14.0458		0.00908198	[0.0067-0.0115] unit decrease	NR [2265555] (imputed)	N	metabolic syndrome	http://www.ebi.ac.uk/efo/EFO_0000195	GCST90444487	Genome-wide genotyping array
	2022-07-01	33177712	Bar N	2020-11-11	Nature	www.ncbi.nlm.nih.gov/pubmed/33177712	A reference map of potential determinants for the human serum metabolome.	X-11593 levels	1,170 Israeli ancestry individuals	NA	22q11.21	22	19961490		COMT			ENSG00000093010			rs165722-?	rs165722	0	165722	intron_variant	0	NR	2e-15	14.699		0.6114	[0.47-0.76] unit increase	Illumina [NR] (imputed)	N	serum metabolite measurement	http://www.ebi.ac.uk/efo/EFO_0005653	GCST90105001	Genome-wide genotyping array
	2021-06-29	33462484	Sinnott-Armstrong N	2021-01-18	Nat Genet	www.ncbi.nlm.nih.gov/pubmed/33462484	Genetics of 35 blood and urine biomarkers in the UK Biobank.	Apolipoprotein B levels	340,860 European ancestry individuals, 5,962 African ancestry individuals, 7,275 South Asian ancestry individuals	NA	22q11.21	22	19961490	NR	COMT			ENSG00000093010			rs165722-T	rs165722	0	165722	intron_variant	0	NR	2e-09	8.69897		0.0144	[0.0097-0.0191] unit increase	Affymetrix [9000000] (imputed)	N	apolipoprotein B measurement	http://www.ebi.ac.uk/efo/EFO_0004615	GCST90019496	Genome-wide genotyping array
	2025-02-03	38412862	Suhre K	2024-02-20	Cell Genom	www.ncbi.nlm.nih.gov/pubmed/38412862	Genetic associations with ratios between protein levels detect new pQTLs and reveal protein-protein interactions.	COMT/HNRNPK protein level ratio	43,509 European ancestry individuals	NA	22q11.21	22	19963748		COMT			ENSG00000093010			rs4680-?	rs4680	0	4680	missense_variant	0	NR	4E-3035	3034.4		0.758628	[0.75-0.77] increase	Affymetrix [509492]	N	COMT/HNRNPK protein level ratio in blood	http://purl.obolibrary.org/obo/OBA_2053846	GCST90314194	Genome-wide genotyping array
	2025-02-03	38412862	Suhre K	2024-02-20	Cell Genom	www.ncbi.nlm.nih.gov/pubmed/38412862	Genetic associations with ratios between protein levels detect new pQTLs and reveal protein-protein interactions.	COMT/ITGB1BP2 protein level ratio	43,509 European ancestry individuals	NA	22q11.21	22	19963748		COMT			ENSG00000093010			rs4680-?	rs4680	0	4680	missense_variant	0	NR	1E-2112	2112		0.640053	[0.63-0.65] increase	Affymetrix [509492]	N	COMT/ITGB1BP2 protein level ratio in blood	http://purl.obolibrary.org/obo/OBA_2053847	GCST90314195	Genome-wide genotyping array
	2025-02-03	38412862	Suhre K	2024-02-20	Cell Genom	www.ncbi.nlm.nih.gov/pubmed/38412862	Genetic associations with ratios between protein levels detect new pQTLs and reveal protein-protein interactions.	COMT/RHOC protein level ratio	43,509 European ancestry individuals	NA	22q11.21	22	19963748		COMT			ENSG00000093010			rs4680-?	rs4680	0	4680	missense_variant	0	NR	4E-1820	1819.4		0.608771	[0.6-0.62] increase	Affymetrix [509492]	N	COMT/RHOC protein level ratio in blood	http://purl.obolibrary.org/obo/OBA_2053848	GCST90314196	Genome-wide genotyping array
	2025-02-03	38412862	Suhre K	2024-02-20	Cell Genom	www.ncbi.nlm.nih.gov/pubmed/38412862	Genetic associations with ratios between protein levels detect new pQTLs and reveal protein-protein interactions.	CA13/COMT protein level ratio	43,509 European ancestry individuals	NA	22q11.21	22	19963748		COMT			ENSG00000093010			rs4680-?	rs4680	0	4680	missense_variant	0	NR	5E-2335	2334.3		0.678203	[0.67-0.69] decrease	Affymetrix [509492]	N	CA13/COMT protein level ratio in blood	http://purl.obolibrary.org/obo/OBA_2055715	GCST90313557	Genome-wide genotyping array
	2025-02-03	38412862	Suhre K	2024-02-20	Cell Genom	www.ncbi.nlm.nih.gov/pubmed/38412862	Genetic associations with ratios between protein levels detect new pQTLs and reveal protein-protein interactions.	ABHD14B/COMT protein level ratio	43,509 European ancestry individuals	NA	22q11.21	22	19963748		COMT			ENSG00000093010			rs4680-?	rs4680	0	4680	missense_variant	0	NR	7E-2054	2053.15		0.646734	[0.63-0.66] decrease	Affymetrix [509492]	N	ABHD14B/COMT protein level ratio in blood	http://purl.obolibrary.org/obo/OBA_2053731	GCST90313140	Genome-wide genotyping array
	2018-01-17	29210060	Koster R	2017-12-06	Int J Cancer	www.ncbi.nlm.nih.gov/pubmed/29210060	Genome-wide association study identifies the GLDC/IL33 locus associated with survival of osteosarcoma patients.	Overall survival in osteosarcoma	523 European ancestry individuals	109 Brazilian ancestry individuals	22q11.21	22	19968169	NR	COMT			ENSG00000093010			rs9332377-T	rs9332377	0	9332377	3_prime_UTR_variant	0	NR	7e-06	5.1549		1.78	[1.39-2.29]	Illumina [510856]	N	osteosarcoma, overall survival	http://www.ebi.ac.uk/efo/EFO_0000637, http://www.ebi.ac.uk/efo/EFO_0000638	GCST005158	Genome-wide genotyping array
	2020-04-17	31669095	Zhu Z	2019-10-24	J Allergy Clin Immunol	www.ncbi.nlm.nih.gov/pubmed/31669095	Shared Genetic and Experimental Links between Obesity-Related Traits and Asthma Subtypes in UK Biobank.	Body mass index	457,822 European ancestry individuals	NA	22q11.21	22	19961490	NR	COMT			ENSG00000093010			rs165722-?	rs165722	0	165722	intron_variant	0	NR	8e-09	8.09691				Affymetrix [~ 8270000] (imputed)	N	body mass index	http://www.ebi.ac.uk/efo/EFO_0004340	GCST009871	Genome-wide genotyping array
	2022-11-14	35347128	Yin X	2022-03-28	Nat Commun	www.ncbi.nlm.nih.gov/pubmed/35347128	Genome-wide association studies of metabolites in Finnish men identify disease-relevant loci.	Glucuronide of piperine metabolite C17H21NO3 (3) levels	6,136 Finnish ancestry individuals	NA	22q11.21	22	19959946		COMT			ENSG00000093010			rs174695-T	rs174695	0	174695	intron_variant	0	NR	9e-13	12.0458		0.16	unit decrease	NR [16000000] (imputed)	N	glucuronide of piperine metabolite C17H21NO3 (3) measurement	http://www.ebi.ac.uk/efo/EFO_0801031	GCST90140862	Genome-wide genotyping array, Genome-wide sequencing, Exome-wide sequencing
	2022-11-14	35347128	Yin X	2022-03-28	Nat Commun	www.ncbi.nlm.nih.gov/pubmed/35347128	Genome-wide association studies of metabolites in Finnish men identify disease-relevant loci.	Glucuronide of piperine metabolite C17H21NO3 (4) levels	6,136 Finnish ancestry individuals	NA	22q11.21	22	19959946		COMT			ENSG00000093010			rs174695-T	rs174695	0	174695	intron_variant	0	NR	1e-23	23		0.2	unit decrease	NR [16000000] (imputed)	N	glucuronide of piperine metabolite C17H21NO3 (4) measurement	http://www.ebi.ac.uk/efo/EFO_0801032	GCST90140863	Genome-wide genotyping array, Genome-wide sequencing, Exome-wide sequencing
	2022-11-14	35347128	Yin X	2022-03-28	Nat Commun	www.ncbi.nlm.nih.gov/pubmed/35347128	Genome-wide association studies of metabolites in Finnish men identify disease-relevant loci.	Glucuronide of piperine metabolite C17H21NO3 (5) levels	6,136 Finnish ancestry individuals	NA	22q11.21	22	19959946		COMT			ENSG00000093010			rs174695-T	rs174695	0	174695	intron_variant	0	NR	1e-18	18		0.2	unit decrease	NR [16000000] (imputed)	N	glucuronide of piperine metabolite C17H21NO3 (5) measurement	http://www.ebi.ac.uk/efo/EFO_0801033	GCST90140864	Genome-wide genotyping array, Genome-wide sequencing, Exome-wide sequencing
	2022-11-14	35347128	Yin X	2022-03-28	Nat Commun	www.ncbi.nlm.nih.gov/pubmed/35347128	Genome-wide association studies of metabolites in Finnish men identify disease-relevant loci.	2-o-methylascorbic acid levels	6,136 Finnish ancestry individuals	NA	22q11.21	22	19963748		COMT			ENSG00000093010			rs4680-A	rs4680	0	4680	missense_variant	0	NR	2e-185	184.699		0.52	unit decrease	NR [16000000] (imputed)	N	2-O-methylascorbic acid measurement	http://www.ebi.ac.uk/efo/EFO_0800164	GCST90139651	Genome-wide genotyping array, Genome-wide sequencing, Exome-wide sequencing
	2022-11-14	35347128	Yin X	2022-03-28	Nat Commun	www.ncbi.nlm.nih.gov/pubmed/35347128	Genome-wide association studies of metabolites in Finnish men identify disease-relevant loci.	X-12707 levels	6,136 Finnish ancestry individuals	NA	22q11.21	22	19963748		COMT			ENSG00000093010			rs4680-A	rs4680	0	4680	missense_variant	0	NR	3e-32	31.5229		0.23	unit increase	NR [16000000] (imputed)	N	X-12707 measurement	http://www.ebi.ac.uk/efo/EFO_0800720	GCST90140408	Genome-wide genotyping array, Genome-wide sequencing, Exome-wide sequencing
	2022-11-14	35347128	Yin X	2022-03-28	Nat Commun	www.ncbi.nlm.nih.gov/pubmed/35347128	Genome-wide association studies of metabolites in Finnish men identify disease-relevant loci.	X-12713 levels	6,136 Finnish ancestry individuals	NA	22q11.21	22	19963748		COMT			ENSG00000093010			rs4680-A	rs4680	0	4680	missense_variant	0	NR	2e-25	24.699		0.32	unit decrease	NR [16000000] (imputed)	N	X-12713 measurement	http://www.ebi.ac.uk/efo/EFO_0800721	GCST90140409	Genome-wide genotyping array, Genome-wide sequencing, Exome-wide sequencing
	2024-02-08	36357675	Surendran P	2022-11-10	Nat Med	www.ncbi.nlm.nih.gov/pubmed/36357675	Rare and common genetic determinants of metabolic individuality and their effects on human health.	X-21659 levels	14,296 European ancestry individuals	5,698 European ancestry individuals	22q11.21	22	19961340		COMT			ENSG00000093010			rs165656-C	rs165656	0	165656	intron_variant	0	0.5027	2e-24	23.699		0.144915	[0.12-0.17] unit decrease	Affymetrix [NR] (imputed)	N	metabolite measurement	http://www.ebi.ac.uk/efo/EFO_0004725	GCST90245686	Genome-wide genotyping array
	2024-02-08	36357675	Surendran P	2022-11-10	Nat Med	www.ncbi.nlm.nih.gov/pubmed/36357675	Rare and common genetic determinants of metabolic individuality and their effects on human health.	X-01911 levels	14,296 European ancestry individuals	5,698 European ancestry individuals	22q11.21	22	19961340		COMT			ENSG00000093010			rs165656-C	rs165656	0	165656	intron_variant	0	0.5145	1e-40	40		0.161652	[0.14-0.19] unit decrease	Affymetrix [NR] (imputed)	N	X-01911 measurement	http://www.ebi.ac.uk/efo/EFO_0021181	GCST90245478	Genome-wide genotyping array
	2024-02-08	36357675	Surendran P	2022-11-10	Nat Med	www.ncbi.nlm.nih.gov/pubmed/36357675	Rare and common genetic determinants of metabolic individuality and their effects on human health.	X-11593 levels	14,296 European ancestry individuals	5,698 European ancestry individuals	22q11.21	22	19963748		COMT			ENSG00000093010			rs4680-A	rs4680	0	4680	missense_variant	0	0.5194	3E-613	612.523		0.538169	[0.52-0.56] unit decrease	Affymetrix [NR] (imputed)	N	serum metabolite measurement	http://www.ebi.ac.uk/efo/EFO_0005653	GCST90245509	Genome-wide genotyping array
	2024-02-08	36357675	Surendran P	2022-11-10	Nat Med	www.ncbi.nlm.nih.gov/pubmed/36357675	Rare and common genetic determinants of metabolic individuality and their effects on human health.	X-12707 levels	14,296 European ancestry individuals	5,698 European ancestry individuals	22q11.21	22	19963748		COMT			ENSG00000093010			rs4680-A	rs4680	0	4680	missense_variant	0	0.5223	4e-120	119.398		0.243784	[0.22-0.26] unit increase	Affymetrix [NR] (imputed)	N	X-12707 measurement	http://www.ebi.ac.uk/efo/EFO_0800720	GCST90245556	Genome-wide genotyping array
	2024-02-08	36357675	Surendran P	2022-11-10	Nat Med	www.ncbi.nlm.nih.gov/pubmed/36357675	Rare and common genetic determinants of metabolic individuality and their effects on human health.	X-11849 levels	14,296 European ancestry individuals	5,698 European ancestry individuals	22q11.21	22	19962712		COMT			ENSG00000093010			rs4633-T	rs4633	0	4633	synonymous_variant	0	0.5129	8e-14	13.0969		0.091342	[0.067-0.115] unit decrease	Affymetrix [NR] (imputed)	N	X-11849 measurement	http://www.ebi.ac.uk/efo/EFO_0021269	GCST90245515	Genome-wide genotyping array
	2023-03-09	36566681	Haghighatfard A	2022-12-23	Res Dev Disabil	www.ncbi.nlm.nih.gov/pubmed/36566681	The first genome-wide association study of internet addiction; Revealed substantial shared risk factors with neurodevelopmental psychiatric disorders.	Internet addiction disorder	16,520 Persian, Kurdish, Arab or Armenian ancestry cases, 18,000 Persian, Kurdish, Arab or Armenian ancestry controls	NA	22q11.21	22	19963748		COMT			ENSG00000093010			rs4680-?	rs4680	0	4680	missense_variant	0	NR	5e-09	8.30103		1.8		NR [183649]	N	internet addiction disorder	http://www.ebi.ac.uk/efo/EFO_0803368	GCST90255366	Genome-wide genotyping array
	2022-12-09	24816252	Shin SY	2014-05-11	Nat Genet	www.ncbi.nlm.nih.gov/pubmed/24816252	An atlas of genetic influences on human blood metabolites.	X-11593--O-methylascorbate levels	7,788 European ancestry individuals	NA	22q11.21	22	19963748		COMT			ENSG00000093010			rs4680-A	rs4680	0	4680	missense_variant	0	0.51	5e-178	177.301		0.049	[-0.045--0.053] unit decrease	Affymetrix, Illumina [2100000] (imputed)	N	X-11593 measurement	http://www.ebi.ac.uk/efo/EFO_0020015	GCST90243650	Genome-wide genotyping array
	2022-12-09	24816252	Shin SY	2014-05-11	Nat Genet	www.ncbi.nlm.nih.gov/pubmed/24816252	An atlas of genetic influences on human blood metabolites.	X-01911 levels	6,360 European ancestry individuals	NA	22q11.21	22	19963748		COMT			ENSG00000093010			rs4680-A	rs4680	0	4680	missense_variant	0	0.51	1e-13	13		0.044	[-0.032--0.056] unit decrease	Affymetrix, Illumina [2100000] (imputed)	N	X-01911 measurement	http://www.ebi.ac.uk/efo/EFO_0021181	GCST90243621	Genome-wide genotyping array
	2022-12-12	36376304	Koskeridis F	2022-11-14	Nat Commun	www.ncbi.nlm.nih.gov/pubmed/36376304	Pleiotropic genetic architecture and novel loci for C-reactive protein levels.	Body mass index (MTAG)	694,649 European ancestry individuals	NA	22q11.21	22	19962712		COMT			ENSG00000093010			rs4633-T	rs4633	0	4633	synonymous_variant	0	NR	3e-08	7.52288		0.008911	[0.0058-0.0121] unit increase	NR [6206408] (imputed)	N	body mass index	http://www.ebi.ac.uk/efo/EFO_0004340	GCST90179150	Genome-wide genotyping array
	2023-03-08	36581621	Huang J	2022-12-29	Nat Commun	www.ncbi.nlm.nih.gov/pubmed/36581621	Genomics and phenomics of body mass index reveals a complex disease network.	Body mass index	1,122,049 European ancestry individuals	NA	22q11.21	22	19963748		COMT			ENSG00000093010			rs4680-G	rs4680	0	4680	missense_variant	0	NR	1e-11	11		0.0089	[0.0064-0.0114] unit decrease	Affymetrix [NR] (imputed)	N	body mass index	http://www.ebi.ac.uk/efo/EFO_0004340	GCST90255621	Genome-wide genotyping array
	2023-04-03	34648354	Pietzner M	2021-11-12	Science	www.ncbi.nlm.nih.gov/pubmed/34648354	Mapping the proteo-genomic convergence of human diseases.	Catechol O-methyltransferase levels	10,708 European ancestry individuals	NA	22q11.21	22	19961340		COMT			ENSG00000093010			rs165656-C	rs165656	0	165656	intron_variant	0	0.52	5e-19	18.301		0.122	[0.095-0.149] unit decrease	Affymetrix, Illumina [10200000] (imputed)	N	protein measurement	http://www.ebi.ac.uk/efo/EFO_0004747	GCST90247121	Genome-wide genotyping array
	2024-02-15	36635386	Chen Y	2023-01-12	Nat Genet	www.ncbi.nlm.nih.gov/pubmed/36635386	Genomic atlas of the plasma metabolome prioritizes metabolites implicated in human diseases.	2-o-methylascorbic acid levels	8,219 European ancestry individuals	NA	22q11.21	22	19963748		COMT			ENSG00000093010			rs4680-A	rs4680	0	4680	missense_variant	0	0.515549	7e-226	225.155		0.441232	[0.41-0.47] unit decrease	Affymetrix [15429532] (imputed)	N	2-O-methylascorbic acid measurement	http://www.ebi.ac.uk/efo/EFO_0800164	GCST90199908	Genome-wide genotyping array
	2024-02-15	36635386	Chen Y	2023-01-12	Nat Genet	www.ncbi.nlm.nih.gov/pubmed/36635386	Genomic atlas of the plasma metabolome prioritizes metabolites implicated in human diseases.	Glucuronide of piperine metabolite C17H21NO3 (3) levels	6,512 European ancestry individuals	NA	22q11.21	22	19959946		COMT			ENSG00000093010			rs174695-T	rs174695	0	174695	intron_variant	0	0.440492	1e-22	22		0.174947	[0.14-0.21] unit decrease	Affymetrix [15350454] (imputed)	N	glucuronide of piperine metabolite C17H21NO3 (3) measurement	http://www.ebi.ac.uk/efo/EFO_0801031	GCST90200189	Genome-wide genotyping array
	2024-02-15	36635386	Chen Y	2023-01-12	Nat Genet	www.ncbi.nlm.nih.gov/pubmed/36635386	Genomic atlas of the plasma metabolome prioritizes metabolites implicated in human diseases.	Glucuronide of piperine metabolite C17H21NO3 (4) levels	7,833 European ancestry individuals	NA	22q11.21	22	19959946		COMT			ENSG00000093010			rs174695-T	rs174695	0	174695	intron_variant	0	0.448614	4e-34	33.3979		0.196419	[0.16-0.23] unit decrease	Affymetrix [15416731] (imputed)	N	glucuronide of piperine metabolite C17H21NO3 (4) measurement	http://www.ebi.ac.uk/efo/EFO_0801032	GCST90200208	Genome-wide genotyping array
	2024-02-15	36635386	Chen Y	2023-01-12	Nat Genet	www.ncbi.nlm.nih.gov/pubmed/36635386	Genomic atlas of the plasma metabolome prioritizes metabolites implicated in human diseases.	Glucuronide of piperine metabolite C17H21NO3 (5) levels	6,582 European ancestry individuals	NA	22q11.21	22	19959946		COMT			ENSG00000093010			rs174695-T	rs174695	0	174695	intron_variant	0	0.439702	6e-25	24.2218		0.183984	[0.15-0.22] unit decrease	Affymetrix [15359661] (imputed)	N	glucuronide of piperine metabolite C17H21NO3 (5) measurement	http://www.ebi.ac.uk/efo/EFO_0801033	GCST90200212	Genome-wide genotyping array
	2024-02-15	36635386	Chen Y	2023-01-12	Nat Genet	www.ncbi.nlm.nih.gov/pubmed/36635386	Genomic atlas of the plasma metabolome prioritizes metabolites implicated in human diseases.	3-methoxytyrosine levels	8,258 European ancestry individuals	NA	22q11.21	22	19963748		COMT			ENSG00000093010			rs4680-A	rs4680	0	4680	missense_variant	0	0.514868	6e-11	10.2218		0.0949509	[0.067-0.123] unit decrease	Affymetrix [15431547] (imputed)	N	3-methoxytyrosine measurement	http://www.ebi.ac.uk/efo/EFO_0021009	GCST90200328	Genome-wide genotyping array
	2024-02-15	36635386	Chen Y	2023-01-12	Nat Genet	www.ncbi.nlm.nih.gov/pubmed/36635386	Genomic atlas of the plasma metabolome prioritizes metabolites implicated in human diseases.	X-11849 levels	7,679 European ancestry individuals	NA	22q11.21	22	19961490		COMT			ENSG00000093010			rs165722-T	rs165722	0	165722	intron_variant	0	0.51574	1e-14	14		0.122444	[0.091-0.154] unit decrease	Affymetrix [15411690] (imputed)	N	X-11849 measurement	http://www.ebi.ac.uk/efo/EFO_0021269	GCST90200464	Genome-wide genotyping array
	2024-02-15	36635386	Chen Y	2023-01-12	Nat Genet	www.ncbi.nlm.nih.gov/pubmed/36635386	Genomic atlas of the plasma metabolome prioritizes metabolites implicated in human diseases.	X-12707 levels	7,461 European ancestry individuals	NA	22q11.21	22	19961340		COMT			ENSG00000093010			rs165656-C	rs165656	0	165656	intron_variant	0	0.527042	4e-51	50.3979		0.236019	[0.21-0.27] unit increase	Affymetrix [15399335] (imputed)	N	X-12707 measurement	http://www.ebi.ac.uk/efo/EFO_0800720	GCST90200502	Genome-wide genotyping array
	2021-03-30	32778093	He B	2020-08-10	BMC Biol	www.ncbi.nlm.nih.gov/pubmed/32778093	Genome-wide pQTL analysis of protein expression regulatory networks in the human liver.	Protein quantitative trait loci (liver)	172 European ancestry individuals, 29 Black individuals, 86 individuals	NA	22q11.21	22	19963748	NR	COMT			ENSG00000093010			rs4680-A	rs4680	0	4680	missense_variant	0	0.4948	7e-19	18.1549	(COMT)	0.1787	NR unit decrease	Illumina [1671387] (imputed)	N	protein measurement	http://www.ebi.ac.uk/efo/EFO_0004747	GCST011427	Genome-wide genotyping array
	2020-08-19	32493714	Klimentidis YC	2020-06-03	Diabetes	www.ncbi.nlm.nih.gov/pubmed/32493714	Phenotypic and Genetic Characterization of Lower LDL-C and Increased Type-2 Diabetes Risk in the UK Biobank.	Low density lipoprotein cholesterol levels	431,167 European ancestry individuals	NA	22q11.21	22	19961490	NR	COMT			ENSG00000093010			rs165722-C	rs165722	0	165722	intron_variant	0	0.484285	3e-09	8.52288		0.0114996	[0.0077-0.0153] unit decrease	Affymetrix [15000001]	N	low density lipoprotein cholesterol measurement	http://www.ebi.ac.uk/efo/EFO_0004611	GCST90002412	Genome-wide genotyping array
	2022-08-04	35710981	Liu H	2022-06-16	Nat Genet	www.ncbi.nlm.nih.gov/pubmed/35710981	Epigenomic and transcriptomic analyses define core cell types, genes and targetable mechanisms for kidney disease.	Estimated glomerular filtration rate (creatinine)	1,205,871 European ancestry individuals, 168,300 East Asian ancestry individuals, 63,553 African ancestry individuals, 23,509 Hispanic or Latin American individuals, 22,103 African American individuals, 21,791 Central Asian or South Asian ancestry individuals, 1,502 Middle Eastern ancestry individuals, 939 other admixed ancestry individuals, 602 Native American ancestry individuals, 150 Asian anc…	NA	22q11.21	22	19966359		COMT			ENSG00000093010			rs1109436-C	rs1109436	0	1109436	intron_variant	0	0.1558	1e-08	8		5.737	z score increase	Affymetrix, Illumina [12653804] (imputed)	N	glomerular filtration rate	http://purl.obolibrary.org/obo/OBA_0003747	GCST90100220	Genome-wide genotyping array
	2022-11-17	34887591	Graham SE	2021-12-09	Nature	www.ncbi.nlm.nih.gov/pubmed/34887591	The power of genetic diversity in genome-wide association studies of lipids.	Low density lipoprotein cholesterol levels	40,963 South Asian ancestry individuals, 48,057 Hispanic individuals, 99,432 Admixed African or African ancestry individuals, 146,492 East Asian ancestry individuals, 1,320,016 European ancestry individuals	NA	22q11.21	22	19961490		COMT			ENSG00000093010			rs165722-?	rs165722	0	165722	intron_variant	0	NR	5e-09	8.30103				NR [52000000] (imputed)	N	low density lipoprotein cholesterol measurement	http://www.ebi.ac.uk/efo/EFO_0004611	GCST90239655	Genome-wide genotyping array
	2022-11-17	35995766	Tahir UA	2022-08-22	Nat Commun	www.ncbi.nlm.nih.gov/pubmed/35995766	Whole Genome Association Study of the Plasma Metabolome Identifies Metabolites Linked to Cardiometabolic Disease in Black Individuals.	Metabolite peak levels (QI3785)	2,466 Black/admixed ancestry individuals	up to 1,653 European, Hispanic, Asian or Black individuals	22q11.21	22	19963748		COMT			ENSG00000093010			rs4680-A	rs4680	0	4680	missense_variant	0	NR	6e-14	13.2218	(African American or Afro-Caribbean)	0.237647	[0.18-0.3] unit decrease	Illumina [159814]	N	metabolite measurement	http://www.ebi.ac.uk/efo/EFO_0004725	GCST90177688	Genome-wide sequencing
	2022-11-17	35995766	Tahir UA	2022-08-22	Nat Commun	www.ncbi.nlm.nih.gov/pubmed/35995766	Whole Genome Association Study of the Plasma Metabolome Identifies Metabolites Linked to Cardiometabolic Disease in Black Individuals.	Metabolite peak levels (QI4123)	2,466 Black/admixed ancestry individuals	up to 1,653 European, Hispanic, Asian or Black individuals	22q11.21	22	19961490		COMT			ENSG00000093010			rs165722-T	rs165722	0	165722	intron_variant	0	NR	4e-20	19.3979		0.263938	[0.21-0.32] unit decrease	Illumina [157662]	N	metabolite measurement	http://www.ebi.ac.uk/efo/EFO_0004725	GCST90177739	Genome-wide sequencing
	2022-11-17	35995766	Tahir UA	2022-08-22	Nat Commun	www.ncbi.nlm.nih.gov/pubmed/35995766	Whole Genome Association Study of the Plasma Metabolome Identifies Metabolites Linked to Cardiometabolic Disease in Black Individuals.	Metabolite peak levels (QI4144)	2,466 Black/admixed ancestry individuals	up to 1,653 European, Hispanic, Asian or Black individuals	22q11.21	22	19961490		COMT			ENSG00000093010			rs165722-T	rs165722	0	165722	intron_variant	0	NR	6e-16	15.2218	(African American or Afro-Caribbean)	0.242976	[0.18-0.3] unit decrease	Illumina [155264]	N	metabolite measurement	http://www.ebi.ac.uk/efo/EFO_0004725	GCST90177743	Genome-wide sequencing
	2022-11-17	35995766	Tahir UA	2022-08-22	Nat Commun	www.ncbi.nlm.nih.gov/pubmed/35995766	Whole Genome Association Study of the Plasma Metabolome Identifies Metabolites Linked to Cardiometabolic Disease in Black Individuals.	Metabolite peak levels (QI2727)	2,466 Black/admixed ancestry individuals	up to 1,653 European, Hispanic, Asian or Black individuals	22q11.21	22	19963748		COMT			ENSG00000093010			rs4680-A	rs4680	0	4680	missense_variant	0	NR	6e-39	38.2218	(African American or Afro-Caribbean)	0.412529	[0.35-0.47] unit decrease	Illumina [155493]	N	metabolite measurement	http://www.ebi.ac.uk/efo/EFO_0004725	GCST90177559	Genome-wide sequencing
	2023-12-11	37280435	Hawkes G	2023-06-06	Diabetologia	www.ncbi.nlm.nih.gov/pubmed/37280435	Genetic evidence that high BMI in childhood has a protective effect on intermediate diabetes traits, including measures of insulin sensitivity and secretion, after accounting for BMI in adulthood.	Body mass index	441,761 European ancestry individuals	NA	22q11.21	22	19961490		COMT			ENSG00000093010			rs165722-C	rs165722	0	165722	intron_variant	0	NR	9e-09	8.04576		0.0113547	[0.0075-0.0152] unit decrease	NR [NR] (imputed)	N	body mass index	http://www.ebi.ac.uk/efo/EFO_0004340	GCST90301650	Genome-wide genotyping array
	2025-01-06	39024449	Verma A	2024-07-19	Science	www.ncbi.nlm.nih.gov/pubmed/39024449	Diversity and scale: Genetic architecture of 2068 traits in the VA Million Veteran Program.	Body mass index (BMI, maximum, inv-normal transformed)	118,995 African American or Afro-Caribbean individuals, 57,796 Hispanic or Latin American individuals, 6,384 East Asian ancestry individuals, 424,231 European ancestry individuals	NA	22q11.21	22	19960814		COMT			ENSG00000093010			rs4646312-T	rs4646312	0	4646312	intron_variant	0	0.6714	1e-11	11		0.02445	[0.017-0.032] unit increase	NR [44300000] (imputed)	N	body mass index	http://www.ebi.ac.uk/efo/EFO_0004340	GCST90479521	Genome-wide genotyping array
	2022-09-28	34282934	Fan W	2021-07-20	mSystems	www.ncbi.nlm.nih.gov/pubmed/34282934	Association between Human Genetic Variants and the Vaginal Bacteriome of Pregnant Women.	Vaginal microbiome MetaCyc pathway (PWY-7234|inosine-5'-phosphate biosynthesis III)	315 Chinese ancestry individuals	NA	22q11.21	22	19951559		COMT			ENSG00000093010			rs140215652-T	rs140215652	0	140215652	intron_variant	0	NR	2e-06	5.69897		1.717	[1.03-2.41] unit increase	Illumina [492582]	N	vaginal microbiome measurement	http://www.ebi.ac.uk/efo/EFO_0011013	GCST90026917	Genome-wide genotyping array
	2023-06-22	37277652	Schlosser P	2023-06-05	Nat Genet	www.ncbi.nlm.nih.gov/pubmed/37277652	Genetic studies of paired metabolomes reveal enzymatic and transport processes at the interface of plasma and urine.	Urine 3,4-dihydroxyphenylacetate levels in chronic kidney disease	4,845 European ancestry individuals	NA	22q11.21	22	19961490		COMT			ENSG00000093010			rs165722-T	rs165722	0	165722	intron_variant	0	0.52	3e-17	16.5229		0.13	[0.1-0.16] unit increase	Illumina [7724483] (imputed)	N	metabolite measurement	http://www.ebi.ac.uk/efo/EFO_0004725	GCST90264582	Genome-wide genotyping array
	2023-06-22	37277652	Schlosser P	2023-06-05	Nat Genet	www.ncbi.nlm.nih.gov/pubmed/37277652	Genetic studies of paired metabolomes reveal enzymatic and transport processes at the interface of plasma and urine.	Plasma glucuronide of piperine metabolite C17H21NO3 (5)* levels in chronic kidney disease	4,417 European ancestry individuals	NA	22q11.21	22	19961490		COMT			ENSG00000093010			rs165722-T	rs165722	0	165722	intron_variant	0	0.51	2e-18	17.699		0.215	[0.17-0.26] unit decrease	Illumina [7721954] (imputed)	N	glucuronide of piperine metabolite C17H21NO3 (5) measurement	http://www.ebi.ac.uk/efo/EFO_0801033	GCST90265234	Genome-wide genotyping array
	2023-06-22	37277652	Schlosser P	2023-06-05	Nat Genet	www.ncbi.nlm.nih.gov/pubmed/37277652	Genetic studies of paired metabolomes reveal enzymatic and transport processes at the interface of plasma and urine.	Urine glucuronide of piperine metabolite C17H21NO3 (5)* levels in chronic kidney disease	4,783 European ancestry individuals	NA	22q11.21	22	19963748		COMT			ENSG00000093010			rs4680-A	rs4680	0	4680	missense_variant	0	0.52	1e-25	25		0.271	[0.22-0.32] unit decrease	Illumina [7723963] (imputed)	N	glucuronide of piperine metabolite C17H21NO3 (5) measurement	http://www.ebi.ac.uk/efo/EFO_0801033	GCST90265235	Genome-wide genotyping array
	2023-06-22	37277652	Schlosser P	2023-06-05	Nat Genet	www.ncbi.nlm.nih.gov/pubmed/37277652	Genetic studies of paired metabolomes reveal enzymatic and transport processes at the interface of plasma and urine.	Plasma glucuronide of piperine metabolite C17H21NO3 (3)* levels in chronic kidney disease	4,375 European ancestry individuals	NA	22q11.21	22	19961490		COMT			ENSG00000093010			rs165722-T	rs165722	0	165722	intron_variant	0	0.51	1e-16	16		0.203	[0.16-0.25] unit decrease	Illumina [7722343] (imputed)	N	glucuronide of piperine metabolite C17H21NO3 (3) measurement	http://www.ebi.ac.uk/efo/EFO_0801031	GCST90265230	Genome-wide genotyping array
	2023-06-22	37277652	Schlosser P	2023-06-05	Nat Genet	www.ncbi.nlm.nih.gov/pubmed/37277652	Genetic studies of paired metabolomes reveal enzymatic and transport processes at the interface of plasma and urine.	Urine glucuronide of piperine metabolite C17H21NO3 (3)* levels in chronic kidney disease	4,747 European ancestry individuals	NA	22q11.21	22	19961490		COMT			ENSG00000093010			rs165722-T	rs165722	0	165722	intron_variant	0	0.52	4e-20	19.3979		0.239	[0.19-0.29] unit decrease	Illumina [7724021] (imputed)	N	glucuronide of piperine metabolite C17H21NO3 (3) measurement	http://www.ebi.ac.uk/efo/EFO_0801031	GCST90265231	Genome-wide genotyping array
	2023-06-22	37277652	Schlosser P	2023-06-05	Nat Genet	www.ncbi.nlm.nih.gov/pubmed/37277652	Genetic studies of paired metabolomes reveal enzymatic and transport processes at the interface of plasma and urine.	Plasma glucuronide of piperine metabolite C17H21NO3 (4)* levels in chronic kidney disease	4,478 European ancestry individuals	NA	22q11.21	22	19963748		COMT			ENSG00000093010			rs4680-A	rs4680	0	4680	missense_variant	0	0.51	7e-19	18.1549		0.217	[0.17-0.26] unit decrease	Illumina [7722738] (imputed)	N	glucuronide of piperine metabolite C17H21NO3 (4) measurement	http://www.ebi.ac.uk/efo/EFO_0801032	GCST90265232	Genome-wide genotyping array
	2023-06-22	37277652	Schlosser P	2023-06-05	Nat Genet	www.ncbi.nlm.nih.gov/pubmed/37277652	Genetic studies of paired metabolomes reveal enzymatic and transport processes at the interface of plasma and urine.	Urine glucuronide of piperine metabolite C17H21NO3 (4)* levels in chronic kidney disease	4,851 European ancestry individuals	NA	22q11.21	22	19963748		COMT			ENSG00000093010			rs4680-A	rs4680	0	4680	missense_variant	0	0.52	3e-20	19.5229		0.242	[0.19-0.29] unit decrease	Illumina [7723059] (imputed)	N	glucuronide of piperine metabolite C17H21NO3 (4) measurement	http://www.ebi.ac.uk/efo/EFO_0801032	GCST90265233	Genome-wide genotyping array
	2023-06-22	37277652	Schlosser P	2023-06-05	Nat Genet	www.ncbi.nlm.nih.gov/pubmed/37277652	Genetic studies of paired metabolomes reveal enzymatic and transport processes at the interface of plasma and urine.	Plasma 2-O-methylascorbic acid levels in chronic kidney disease	4,960 European ancestry individuals	NA	22q11.21	22	19963748		COMT			ENSG00000093010			rs4680-A	rs4680	0	4680	missense_variant	0	0.52	5e-174	173.301		0.236	[0.22-0.25] unit decrease	Illumina [7723840] (imputed)	N	2-O-methylascorbic acid measurement	http://www.ebi.ac.uk/efo/EFO_0800164	GCST90264401	Genome-wide genotyping array
	2023-06-22	37277652	Schlosser P	2023-06-05	Nat Genet	www.ncbi.nlm.nih.gov/pubmed/37277652	Genetic studies of paired metabolomes reveal enzymatic and transport processes at the interface of plasma and urine.	Urine 2-O-methylascorbic acid levels in chronic kidney disease	4,912 European ancestry individuals	NA	22q11.21	22	19963748		COMT			ENSG00000093010			rs4680-A	rs4680	0	4680	missense_variant	0	0.52	4e-161	160.398		0.219	[0.2-0.23] unit decrease	Illumina [7723603] (imputed)	N	2-O-methylascorbic acid measurement	http://www.ebi.ac.uk/efo/EFO_0800164	GCST90264402	Genome-wide genotyping array
	2023-06-22	37277652	Schlosser P	2023-06-05	Nat Genet	www.ncbi.nlm.nih.gov/pubmed/37277652	Genetic studies of paired metabolomes reveal enzymatic and transport processes at the interface of plasma and urine.	Urine X-17342 levels in chronic kidney disease	3,880 European ancestry individuals	NA	22q11.21	22	19963748		COMT			ENSG00000093010			rs4680-A	rs4680	0	4680	missense_variant	0	0.53	6e-17	16.2218		0.145	[0.11-0.18] unit increase	Illumina [7723851] (imputed)	N	metabolite measurement	http://www.ebi.ac.uk/efo/EFO_0004725	GCST90266385	Genome-wide genotyping array
	2023-06-22	37277652	Schlosser P	2023-06-05	Nat Genet	www.ncbi.nlm.nih.gov/pubmed/37277652	Genetic studies of paired metabolomes reveal enzymatic and transport processes at the interface of plasma and urine.	Plasma X-11849 levels in chronic kidney disease	3,795 European ancestry individuals	NA	22q11.21	22	19963748		COMT			ENSG00000093010			rs4680-A	rs4680	0	4680	missense_variant	0	0.51	6e-13	12.2218		0.283	[0.21-0.36] unit decrease	Illumina [7725133] (imputed)	N	X-11849 measurement	http://www.ebi.ac.uk/efo/EFO_0021269	GCST90266175	Genome-wide genotyping array
	2023-06-22	37277652	Schlosser P	2023-06-05	Nat Genet	www.ncbi.nlm.nih.gov/pubmed/37277652	Genetic studies of paired metabolomes reveal enzymatic and transport processes at the interface of plasma and urine.	Urine X-12707 levels in chronic kidney disease	4,886 European ancestry individuals	NA	22q11.21	22	19963748		COMT			ENSG00000093010			rs4680-A	rs4680	0	4680	missense_variant	0	0.52	7e-24	23.1549		0.15	[0.12-0.18] unit increase	Illumina [7724385] (imputed)	N	X-12707 measurement	http://www.ebi.ac.uk/efo/EFO_0800720	GCST90266249	Genome-wide genotyping array
	2023-06-22	37277652	Schlosser P	2023-06-05	Nat Genet	www.ncbi.nlm.nih.gov/pubmed/37277652	Genetic studies of paired metabolomes reveal enzymatic and transport processes at the interface of plasma and urine.	Urine X-12708 levels in chronic kidney disease	4,906 European ancestry individuals	NA	22q11.21	22	19963748		COMT			ENSG00000093010			rs4680-A	rs4680	0	4680	missense_variant	0	0.52	2e-60	59.699		0.213	[0.19-0.24] unit decrease	Illumina [7723574] (imputed)	N	metabolite measurement	http://www.ebi.ac.uk/efo/EFO_0004725	GCST90266250	Genome-wide genotyping array
	2023-06-22	37277652	Schlosser P	2023-06-05	Nat Genet	www.ncbi.nlm.nih.gov/pubmed/37277652	Genetic studies of paired metabolomes reveal enzymatic and transport processes at the interface of plasma and urine.	Urine X-12713 levels in chronic kidney disease	4,905 European ancestry individuals	NA	22q11.21	22	19961490		COMT			ENSG00000093010			rs165722-T	rs165722	0	165722	intron_variant	0	0.52	8e-39	38.0969		0.154	[0.13-0.18] unit decrease	Illumina [7723724] (imputed)	N	X-12713 measurement	http://www.ebi.ac.uk/efo/EFO_0800721	GCST90266251	Genome-wide genotyping array
	2024-11-29	39528826	Wang C	2024-11-11	Nat Genet	www.ncbi.nlm.nih.gov/pubmed/39528826	Genetic architecture of cerebrospinal fluid and brain metabolite levels and the genetic colocalization of metabolites with human traits.	Cerebrospinal fluid 2-O-methylascorbic acid levels	2,602 European ancestry individuals	NA	22q11.21	22	19963748		COMT			ENSG00000093010			rs4680-A	rs4680	0	4680	missense_variant	0	NR	8e-23	22.0969		0.0228	[0.018-0.027] unit decrease	Affymetrix, Illumina [10307658] (imputed)	N	cerebrospinal fluid composition attribute, 2-O-methylascorbic acid measurement	http://purl.obolibrary.org/obo/OBA_2045291, http://www.ebi.ac.uk/efo/EFO_0800164	GCST90318064	Genome-wide genotyping array
	2022-07-18	27073872	Yet I	2016-04-13	PLoS One	www.ncbi.nlm.nih.gov/pubmed/27073872	Genetic Influences on Metabolite Levels: A Comparison across Metabolomic Platforms.	X-11593 levels	79 monozygotic twin pairs, 215 dizygotic twin pairs, 413 individuals	NA	22q11.21	22	19961490		COMT			ENSG00000093010			rs165722-?	rs165722	0	165722	intron_variant	0	NR	3e-34	33.5229		0.432923	[0.36-0.5] unit increase	Illumina [NR] (imputed)	N	X-11593 measurement	http://www.ebi.ac.uk/efo/EFO_0020015	GCST90128951	Genome-wide genotyping array
	2022-11-17	34887591	Graham SE	2021-12-09	Nature	www.ncbi.nlm.nih.gov/pubmed/34887591	The power of genetic diversity in genome-wide association studies of lipids.	Non-HDL cholesterol levels	40,963 South Asian ancestry individuals, 48,057 Hispanic individuals, 99,432 Admixed African or African ancestry individuals, 146,492 East Asian ancestry individuals, 1,320,016 European ancestry individuals	NA	22q11.21	22	19962712		COMT			ENSG00000093010			rs4633-?	rs4633	0	4633	synonymous_variant	0	NR	2e-08	7.69897				NR [52000000] (imputed)	N	non-high density lipoprotein cholesterol measurement	http://www.ebi.ac.uk/efo/EFO_0005689	GCST90239667	Genome-wide genotyping array
	2022-11-17	34887591	Graham SE	2021-12-09	Nature	www.ncbi.nlm.nih.gov/pubmed/34887591	The power of genetic diversity in genome-wide association studies of lipids.	Non-HDL cholesterol levels	1,320,016 European ancestry individuals	NA	22q11.21	22	19961490		COMT			ENSG00000093010			rs165722-T	rs165722	0	165722	intron_variant	0	0.530669	2e-08	7.69897		0.0107801	[0.0076-0.014] unit increase	NR [52000000] (imputed)	N	non-high density lipoprotein cholesterol measurement	http://www.ebi.ac.uk/efo/EFO_0005689	GCST90239670	Genome-wide genotyping array
	2022-11-17	34887591	Graham SE	2021-12-09	Nature	www.ncbi.nlm.nih.gov/pubmed/34887591	The power of genetic diversity in genome-wide association studies of lipids.	Low density lipoprotein cholesterol levels	1,320,016 European ancestry individuals	NA	22q11.21	22	19961490		COMT			ENSG00000093010			rs165722-T	rs165722	0	165722	intron_variant	0	0.528868	2e-08	7.69897		0.00910311	[0.0064-0.0118] unit increase	NR [52000000] (imputed)	N	low density lipoprotein cholesterol measurement	http://www.ebi.ac.uk/efo/EFO_0004611	GCST90239658	Genome-wide genotyping array
	2023-01-09	35050183	Hysi PG	2022-01-11	Metabolites	www.ncbi.nlm.nih.gov/pubmed/35050183	Metabolome Genome-Wide Association Study Identifies 74 Novel Genomic Regions Influencing Plasma Metabolites Levels.	3-methoxytyrosine levels	8,809 European ancestry individuals	NA	22q11.21	22	19963748		COMT			ENSG00000093010			rs4680-G	rs4680	0	4680	missense_variant	0	NR	1e-16	16		0.121	[0.092-0.15] unit increase	Affymetrix [10000000] (imputed)	N	3-methoxytyrosine measurement	http://www.ebi.ac.uk/efo/EFO_0021009	GCST90102810	Genome-wide genotyping array
	2023-01-09	35050183	Hysi PG	2022-01-11	Metabolites	www.ncbi.nlm.nih.gov/pubmed/35050183	Metabolome Genome-Wide Association Study Identifies 74 Novel Genomic Regions Influencing Plasma Metabolites Levels.	Glucuronide of piperine metabolite c17h21no3 (4) (X-01911) levels	8,809 European ancestry individuals	NA	22q11.21	22	19963748		COMT			ENSG00000093010			rs4680-G	rs4680	0	4680	missense_variant	0	NR	1e-29	29		0.181	[0.15-0.21] unit increase	Affymetrix [10000000] (imputed)	N	glucuronide of piperine metabolite C17H21NO3 (4) measurement	http://www.ebi.ac.uk/efo/EFO_0801032	GCST90102982	Genome-wide genotyping array
	2023-01-09	35050183	Hysi PG	2022-01-11	Metabolites	www.ncbi.nlm.nih.gov/pubmed/35050183	Metabolome Genome-Wide Association Study Identifies 74 Novel Genomic Regions Influencing Plasma Metabolites Levels.	Glucuronide of piperine metabolite c17h21no3 (4) (X-01911) levels	8,809 European ancestry individuals	NA	22q11.21	22	19961340		COMT			ENSG00000093010			rs165656-G	rs165656	0	165656	intron_variant	0	NR	8e-29	28.0969		0.178	[0.15-0.21] unit increase	Affymetrix [10000000] (imputed)	N	glucuronide of piperine metabolite C17H21NO3 (4) measurement	http://www.ebi.ac.uk/efo/EFO_0801032	GCST90102982	Genome-wide genotyping array
	2023-01-09	35050183	Hysi PG	2022-01-11	Metabolites	www.ncbi.nlm.nih.gov/pubmed/35050183	Metabolome Genome-Wide Association Study Identifies 74 Novel Genomic Regions Influencing Plasma Metabolites Levels.	Glucuronide of piperine metabolite c17h21no3 (4) (X-01911) levels	8,809 European ancestry individuals	NA	22q11.21	22	19961490		COMT			ENSG00000093010			rs165722-C	rs165722	0	165722	intron_variant	0	NR	2e-29	28.699		0.18	[0.15-0.21] unit increase	Affymetrix [10000000] (imputed)	N	glucuronide of piperine metabolite C17H21NO3 (4) measurement	http://www.ebi.ac.uk/efo/EFO_0801032	GCST90102982	Genome-wide genotyping array
	2024-02-08	36357675	Surendran P	2022-11-10	Nat Med	www.ncbi.nlm.nih.gov/pubmed/36357675	Rare and common genetic determinants of metabolic individuality and their effects on human health.	3-methoxytyrosine levels	14,296 European ancestry individuals	5,698 European ancestry individuals	22q11.21	22	19962712		COMT			ENSG00000093010			rs4633-T	rs4633	0	4633	synonymous_variant	0	0.5191	4e-31	30.3979		0.116945	[0.097-0.137] unit decrease	Affymetrix [NR] (imputed)	N	3-methoxytyrosine measurement	http://www.ebi.ac.uk/efo/EFO_0021009	GCST90245034	Genome-wide genotyping array
	2025-01-06	39024449	Verma A	2024-07-19	Science	www.ncbi.nlm.nih.gov/pubmed/39024449	Diversity and scale: Genetic architecture of 2068 traits in the VA Million Veteran Program.	Body mass index (BMI, maximum, inv-normal transformed)	424,231 European ancestry individuals	NA	22q11.21	22	19960814		COMT			ENSG00000093010			rs4646312-T	rs4646312	0	4646312	intron_variant	0	0.6189	2e-24	23.699		0.03095	[0.025-0.037] unit increase	NR [44300000] (imputed)	N	body mass index	http://www.ebi.ac.uk/efo/EFO_0004340	GCST90475153	Genome-wide genotyping array
	2025-01-06	39024449	Verma A	2024-07-19	Science	www.ncbi.nlm.nih.gov/pubmed/39024449	Diversity and scale: Genetic architecture of 2068 traits in the VA Million Veteran Program.	Body mass index (BMI, mean, inv-normal transformed)	424,221 European ancestry individuals	NA	22q11.21	22	19960814		COMT			ENSG00000093010			rs4646312-T	rs4646312	0	4646312	intron_variant	0	0.6189	2e-17	16.699		0.02545	[0.02-0.031] unit increase	NR [44300000] (imputed)	N	body mass index	http://www.ebi.ac.uk/efo/EFO_0004340	GCST90475156	Genome-wide genotyping array
	2025-01-06	39024449	Verma A	2024-07-19	Science	www.ncbi.nlm.nih.gov/pubmed/39024449	Diversity and scale: Genetic architecture of 2068 traits in the VA Million Veteran Program.	Hemoglobin A1c (HbA1c, mean, inv-norm transformed)	338,848 European ancestry individuals	NA	22q11.21	22	19961490		COMT			ENSG00000093010			rs165722-C	rs165722	0	165722	intron_variant	0	0.4916	4e-17	16.3979		0.02506	[0.019-0.031] unit decrease	NR [44300000] (imputed)	N	HbA1c measurement	http://www.ebi.ac.uk/efo/EFO_0004541	GCST90475094	Genome-wide genotyping array
	2025-01-06	39024449	Verma A	2024-07-19	Science	www.ncbi.nlm.nih.gov/pubmed/39024449	Diversity and scale: Genetic architecture of 2068 traits in the VA Million Veteran Program.	Hemoglobin A1c (HbA1c, maximum, inv-norm transformed)	338,857 European ancestry individuals	NA	22q11.21	22	19961490		COMT			ENSG00000093010			rs165722-C	rs165722	0	165722	intron_variant	0	0.4916	2e-15	14.699		0.02327	[0.018-0.029] unit decrease	NR [44300000] (imputed)	N	HbA1c measurement	http://www.ebi.ac.uk/efo/EFO_0004541	GCST90475091	Genome-wide genotyping array
	2025-01-06	39024449	Verma A	2024-07-19	Science	www.ncbi.nlm.nih.gov/pubmed/39024449	Diversity and scale: Genetic architecture of 2068 traits in the VA Million Veteran Program.	Hemoglobin A1c (HbA1c, minimum, inv-norm transformed)	338,640 European ancestry individuals	NA	22q11.21	22	19961490		COMT			ENSG00000093010			rs165722-C	rs165722	0	165722	intron_variant	0	0.4916	3e-15	14.5229		0.02333	[0.018-0.029] unit decrease	NR [44300000] (imputed)	N	HbA1c measurement	http://www.ebi.ac.uk/efo/EFO_0004541	GCST90475097	Genome-wide genotyping array
	2025-01-06	39024449	Verma A	2024-07-19	Science	www.ncbi.nlm.nih.gov/pubmed/39024449	Diversity and scale: Genetic architecture of 2068 traits in the VA Million Veteran Program.	Weight (maximum, inv-normal transformed)	425,541 European ancestry individuals	NA	22q11.21	22	19960814		COMT			ENSG00000093010			rs4646312-T	rs4646312	0	4646312	intron_variant	0	0.6189	2e-23	22.699		0.02975	[0.024-0.036] unit increase	NR [44300000] (imputed)	N	body weight	http://www.ebi.ac.uk/efo/EFO_0004338	GCST90476460	Genome-wide genotyping array
	2025-01-06	39024449	Verma A	2024-07-19	Science	www.ncbi.nlm.nih.gov/pubmed/39024449	Diversity and scale: Genetic architecture of 2068 traits in the VA Million Veteran Program.	Hemoglobin A1c (HbA1c, maximum, inv-norm transformed)	98,772 African American or Afro-Caribbean individuals, 49,229 Hispanic or Latin American individuals, 5,477 East Asian ancestry individuals, 338,857 European ancestry individuals	NA	22q11.21	22	19962712		COMT			ENSG00000093010			rs4633-C	rs4633	0	4633	synonymous_variant	0	0.5463	1e-11	11		0.0212	[0.015-0.027] unit decrease	NR [44300000] (imputed)	N	HbA1c measurement	http://www.ebi.ac.uk/efo/EFO_0004541	GCST90479500	Genome-wide genotyping array
	2025-01-06	39024449	Verma A	2024-07-19	Science	www.ncbi.nlm.nih.gov/pubmed/39024449	Diversity and scale: Genetic architecture of 2068 traits in the VA Million Veteran Program.	Hemoglobin A1c (HbA1c, mean, inv-norm transformed)	98,735 African American or Afro-Caribbean individuals, 49,225 Hispanic or Latin American individuals, 5,475 East Asian ancestry individuals, 338,848 European ancestry individuals	NA	22q11.21	22	19962712		COMT			ENSG00000093010			rs4633-C	rs4633	0	4633	synonymous_variant	0	0.5463	3e-12	11.5229		0.02233	[0.016-0.029] unit decrease	NR [44300000] (imputed)	N	HbA1c measurement	http://www.ebi.ac.uk/efo/EFO_0004541	GCST90479501	Genome-wide genotyping array
	2025-01-06	39024449	Verma A	2024-07-19	Science	www.ncbi.nlm.nih.gov/pubmed/39024449	Diversity and scale: Genetic architecture of 2068 traits in the VA Million Veteran Program.	Hemoglobin A1c (HbA1c, minimum, inv-norm transformed)	98,578 African American or Afro-Caribbean individuals, 49,152 Hispanic or Latin American individuals, 5,466 East Asian ancestry individuals, 338,640 European ancestry individuals	NA	22q11.21	22	19961490		COMT			ENSG00000093010			rs165722-C	rs165722	0	165722	intron_variant	0	0.506	1e-11	11		0.02089	[0.015-0.027] unit decrease	NR [44300000] (imputed)	N	HbA1c measurement	http://www.ebi.ac.uk/efo/EFO_0004541	GCST90479502	Genome-wide genotyping array
Yes	2025-02-14	38326779	Boahen CK	2024-02-08	BMC Genomics	www.ncbi.nlm.nih.gov/pubmed/38326779	Sex-biased genetic regulation of inflammatory proteins in the Dutch population.	IL10RB levels	359 European ancestry females	NA	22q11.21	22	19948686		COMT			ENSG00000093010			rs9606194-?	rs9606194	0	9606194	intron_variant	0	NR	6e-07	6.22185		4.977	z score increase	Illumina [4296841] (imputed)	N	interleukin 10 measurement	http://www.ebi.ac.uk/efo/EFO_0004750	GCST90503437	Genome-wide genotyping array
	2025-01-06	39024449	Verma A	2024-07-19	Science	www.ncbi.nlm.nih.gov/pubmed/39024449	Diversity and scale: Genetic architecture of 2068 traits in the VA Million Veteran Program.	Weight (mean, inv-normal transformed)	425,535 European ancestry individuals	NA	22q11.21	22	19960814		COMT			ENSG00000093010			rs4646312-T	rs4646312	0	4646312	intron_variant	0	0.6189	5e-17	16.301		0.02483	[0.019-0.031] unit increase	NR [44300000] (imputed)	N	body weight	http://www.ebi.ac.uk/efo/EFO_0004338	GCST90476463	Genome-wide genotyping array
	2021-12-14	34594039	Sakaue S	2021-09-30	Nat Genet	www.ncbi.nlm.nih.gov/pubmed/34594039	A cross-population atlas of genetic associations for 220 human phenotypes.	Medication use (HMG CoA reductase inhibitors)	73,475 European ancestry cases, 216,910 European ancestry controls, 33,295 East Asian ancestry cases, 145,431 East Asian ancestry controls	NA	22q11.21	22	19961490		COMT			ENSG00000093010			rs165722-T	rs165722	0	165722	intron_variant	0	NR	3e-08	7.52288		0.0274	[0.018-0.037] unit increase	Affymetrix, Illumina [15248280] (imputed)	N	HMG CoA reductase inhibitor use measurement	http://www.ebi.ac.uk/efo/EFO_0009932	GCST90018989	Genome-wide genotyping array
	2019-02-06	30595370	Kichaev G	2018-12-27	Am J Hum Genet	www.ncbi.nlm.nih.gov/pubmed/30595370	Leveraging Polygenic Functional Enrichment to Improve GWAS Power.	Body mass index	approximately 458,000 European ancestry individuals	NA	17q11.2	17	30219896		SLC6A4			ENSG00000108576			rs2020942-?	rs2020942	0	2020942	intron_variant	0	NR	4e-11	10.3979				NR [~ 8900000] (imputed)	N	body mass index	http://www.ebi.ac.uk/efo/EFO_0004340	GCST007039	Genome-wide genotyping array
	2019-09-23	31501611	Karlsson T	2019-09-09	Nat Med	www.ncbi.nlm.nih.gov/pubmed/31501611	Contribution of genetics to visceral adiposity and its relation to cardiovascular and metabolic disease.	Predicted visceral adipose tissue	325,153 British ancestry individuals	NA	17q11.2	17	30219896	NR	SLC6A4			ENSG00000108576			rs2020942-T	rs2020942	0	2020942	intron_variant	0	0.3965	2e-09	8.69897		0.0151581	[0.01-0.02] unit increase	Affymetrix [10549349] (imputed)	N	visceral adipose tissue quantity	http://purl.obolibrary.org/obo/OBA_2045224	GCST008744	Genome-wide genotyping array
	2019-02-08	30595370	Kichaev G	2018-12-27	Am J Hum Genet	www.ncbi.nlm.nih.gov/pubmed/30595370	Leveraging Polygenic Functional Enrichment to Improve GWAS Power.	Mean corpuscular hemoglobin	approximately 443,000 European ancestry individuals	NA	17q11.2	17	30226471		SLC6A4			ENSG00000108576			rs11872020-?	rs11872020	0	11872020	intron_variant	0	NR	1e-09	9				NR [~ 8900000] (imputed)	N	mean corpuscular hemoglobin	http://www.ebi.ac.uk/efo/EFO_0004527	GCST007068	Genome-wide genotyping array
	2019-07-17	28552196	Tachmazidou I	2017-06-01	Am J Hum Genet	www.ncbi.nlm.nih.gov/pubmed/28552196	Whole-Genome Sequencing Coupled to Imputation Discovers Genetic Signals for Anthropometric Traits.	Height	1,249 whole genome sequenced European ancestry individuals, 3,541 whole genome sequenced individuals, 46,910 European ancestry individuals, 471 Carlantino (founder/genetic isolate) individuals, 1,197 Friuli Venezia Giulia (founder/genetic isolate) individuals, 1,043 Mylopotamos (founder/genetic isolate) individuals, 933 Pomak (founder/genetic isolate) individuals, 1,785 Val Borbera (founder/genet…	205,003 European ancestry individuals	17q11.2	17	30208921	SLC6A4	SLC6A4			ENSG00000108576			rs56124265-T	rs56124265	0	56124265	intron_variant	0	0.0469	1e-06	6		0.0805	[0.048-0.113] unit increase	Affymetrix, Illumina, Perlegen [15844966] (imputed)	N	body height	http://purl.obolibrary.org/obo/OBA_VT0001253	GCST008163	Genome-wide genotyping array
Yes	2023-02-27	36662838	Slomian D	2023-01-20	PLoS One	www.ncbi.nlm.nih.gov/pubmed/36662838	Better safe than sorry-Whole-genome sequencing indicates that missense variants are significant in susceptibility to COVID-19.	Resistance to COVID-19 infection (Exposed negative vs positive)	306 resistant cases, up to 770 benign, mild or severe controls	NA	17q11.2	17	30201824		SLC6A4			ENSG00000108576			rs11080121-?	rs11080121	0	11080121	intron_variant	0	NR	6e-13	12.2218				Illumina [15489173]	N	COVID-19	http://purl.obolibrary.org/obo/MONDO_0100096	GCST90255358	Genome-wide sequencing
	2023-03-30	36378351	Williams CM	2022-11-15	Behav Genet	www.ncbi.nlm.nih.gov/pubmed/36378351	A General Cognitive Ability Factor for the UK Biobank.	Intelligence	223,731 British ancestry individuals	NA	17q11.2	17	30202007		SLC6A4			ENSG00000108576			rs12450956-?	rs12450956	0	12450956	intron_variant	0	NR	3e-08	7.52288				Affymetrix [5319661] (imputed)	N	intelligence	http://www.ebi.ac.uk/efo/EFO_0004337	GCST90264174	Genome-wide genotyping array
	2020-07-24	32439900	Ntalla I	2020-05-21	Nat Commun	www.ncbi.nlm.nih.gov/pubmed/32439900	Multi-ancestry GWAS of the electrocardiographic PR interval identifies 202 loci underlying cardiac conduction.	PR interval	271,570 European ancestry individuals	NA	17q11.2	17	30204240	EFCAB5	SLC6A4			ENSG00000108576			rs3794809-C	rs3794809	0	3794809	intron_variant	0	0.5584	3e-11	10.5229		0.4463	[0.32-0.58] ms increase	Affymetrix, Illumina [at least 167995] (imputed)	N	PR interval	http://www.ebi.ac.uk/efo/EFO_0004462	GCST010320	Genome-wide genotyping array
	2020-04-17	31669095	Zhu Z	2019-10-24	J Allergy Clin Immunol	www.ncbi.nlm.nih.gov/pubmed/31669095	Shared Genetic and Experimental Links between Obesity-Related Traits and Asthma Subtypes in UK Biobank.	Body mass index	457,822 European ancestry individuals	NA	17q11.2	17	30219896	NR	SLC6A4			ENSG00000108576			rs2020942-?	rs2020942	0	2020942	intron_variant	0	NR	4e-11	10.3979				Affymetrix [~ 8270000] (imputed)	N	body mass index	http://www.ebi.ac.uk/efo/EFO_0004340	GCST009871	Genome-wide genotyping array
	2023-12-11	37280435	Hawkes G	2023-06-06	Diabetologia	www.ncbi.nlm.nih.gov/pubmed/37280435	Genetic evidence that high BMI in childhood has a protective effect on intermediate diabetes traits, including measures of insulin sensitivity and secretion, after accounting for BMI in adulthood.	Body mass index	441,761 European ancestry individuals	NA	17q11.2	17	30219896		SLC6A4			ENSG00000108576			rs2020942-C	rs2020942	0	2020942	intron_variant	0	NR	2e-11	10.699		0.0131673	[0.0093-0.0171] unit decrease	NR [NR] (imputed)	N	body mass index	http://www.ebi.ac.uk/efo/EFO_0004340	GCST90301650	Genome-wide genotyping array
	2023-08-25	37277458	Vosberg DE	2023-06-05	Sci Rep	www.ncbi.nlm.nih.gov/pubmed/37277458	The genetics of a "femaleness/maleness" score in cardiometabolic traits in the UK biobank.	Multi-trait sex score	141,980 European ancestry males	NA	17q11.2	17	30222791		SLC6A4			ENSG00000108576			rs28914827-?	rs28914827	0	28914827	intron_variant	0	NR	2e-08	7.69897				Affymetrix [8644321] (imputed)	N	sexual dimorphism measurement	http://www.ebi.ac.uk/efo/EFO_0021796	GCST90270118	Genome-wide genotyping array
	2022-08-05	35835914	Watanabe K	2022-07-14	Nat Genet	www.ncbi.nlm.nih.gov/pubmed/35835914	Genome-wide meta-analysis of insomnia prioritizes genes associated with metabolic and psychiatric pathways.	Insomnia	593,724 European ancestry cases, 1,771,286 European ancestry controls	NA	17q11.2	17	30216371		SLC6A4			ENSG00000108576			rs140700-T	rs140700	0	140700	intron_variant	0	NR	2e-08	7.69897		0.009	[0.0051-0.0129] unit decrease	Illumina [10713943] (imputed)	N	insomnia	http://www.ebi.ac.uk/efo/EFO_0004698	GCST90131901	Genome-wide genotyping array
	2022-08-05	35835914	Watanabe K	2022-07-14	Nat Genet	www.ncbi.nlm.nih.gov/pubmed/35835914	Genome-wide meta-analysis of insomnia prioritizes genes associated with metabolic and psychiatric pathways.	Insomnia	593,724 European ancestry cases, 1,771,286 European ancestry controls	NA	17q11.2	17	30220192		SLC6A4			ENSG00000108576			rs8076005-A	rs8076005	0	8076005	intron_variant	0	NR	3e-09	8.52288		0.007	[0.005-0.009] unit increase	Illumina [10713943] (imputed)	N	insomnia	http://www.ebi.ac.uk/efo/EFO_0004698	GCST90131901	Genome-wide genotyping array
Yes	2025-02-14	38326779	Boahen CK	2024-02-08	BMC Genomics	www.ncbi.nlm.nih.gov/pubmed/38326779	Sex-biased genetic regulation of inflammatory proteins in the Dutch population.	IL6 levels	318 European ancestry males	NA	17q11.2	17	30200210		SLC6A4			ENSG00000108576			rs9303628-?	rs9303628	0	9303628	intron_variant	0	NR	7e-06	5.1549		4.48	z score increase	Illumina [4296841] (imputed)	N	interleukin-6 measurement	http://www.ebi.ac.uk/efo/EFO_0004810	GCST90503377	Genome-wide genotyping array
	2023-02-09	36224396	Yengo L	2022-10-12	Nature	www.ncbi.nlm.nih.gov/pubmed/36224396	A saturated map of common genetic variants associated with human height.	Height	5,314,291 European ancestry, Hispanic or Latin American, East Asian ancestry, African ancestry, South Asian ancestry individuals	NA	17q11.2	17	30222880		SLC6A4			ENSG00000108576			rs6354-G	rs6354	0	6354	5_prime_UTR_variant	0	0.1849	1e-11	11		0.0054	[0.0038-0.007] unit decrease	Affymetrix, Illumina [1385132] (imputed)	N	body height	http://purl.obolibrary.org/obo/OBA_VT0001253	GCST90245848	Genome-wide genotyping array
	2024-02-15	36635386	Chen Y	2023-01-12	Nat Genet	www.ncbi.nlm.nih.gov/pubmed/36635386	Genomic atlas of the plasma metabolome prioritizes metabolites implicated in human diseases.	Taurochenodeoxycholic acid 3-sulfate levels	7,157 European ancestry individuals	NA	17q11.2	17	30244910		SLC6A4 - SNORD63	ENSG00000108576	ENSG00000206989		8908	1847	rs12945042-T	rs12945042	0	12945042	regulatory_region_variant	1	0.334596	1e-11	11		0.119943	[0.085-0.155] unit increase	Affymetrix [15387423] (imputed)	N	taurochenodeoxycholic acid 3-sulfate measurement	http://www.ebi.ac.uk/efo/EFO_0800584	GCST90200242	Genome-wide genotyping array
	2023-02-09	36224396	Yengo L	2022-10-12	Nature	www.ncbi.nlm.nih.gov/pubmed/36224396	A saturated map of common genetic variants associated with human height.	Height	5,314,291 European ancestry, Hispanic or Latin American, East Asian ancestry, African ancestry, South Asian ancestry individuals	NA	17q11.2	17	30241283		SLC6A4 - SNORD63	ENSG00000108576	ENSG00000206989		5281	5474	rs28437451-A	rs28437451	0	28437451	intergenic_variant	1	0.0201	4e-11	10.3979	(conditional)	0.0174	[0.012-0.022] unit increase	Affymetrix, Illumina [1385132] (imputed)	N	body height	http://purl.obolibrary.org/obo/OBA_VT0001253	GCST90245848	Genome-wide genotyping array
	2024-04-30	38538606	Harris BHL	2024-03-27	Sci Rep	www.ncbi.nlm.nih.gov/pubmed/38538606	New role of fat-free mass in cancer risk linked with genetic predisposition.	Whole body fat free mass (UKB data field 23101)	337,739 European ancestry individuals	NA	17q11.2	17	30242358		SLC6A4 - SNORD63	ENSG00000108576	ENSG00000206989		6356	4399	rs76422200-A	rs76422200	0	76422200	intergenic_variant	1	NR	3e-15	14.5229		0.0212807	[0.016-0.027] unit decrease	Affymetrix [18893866] (imputed)	N	lean body mass	http://www.ebi.ac.uk/efo/EFO_0004995	GCST90428120	Genome-wide genotyping array
	2021-12-14	34594039	Sakaue S	2021-09-30	Nat Genet	www.ncbi.nlm.nih.gov/pubmed/34594039	A cross-population atlas of genetic associations for 220 human phenotypes.	Serum total protein levels	314,921 European ancestry individuals, 133,321 East Asian ancestry individuals	NA	17q11.2	17	30189854		NSRP1 - SLC6A4	ENSG00000126653	ENSG00000108576		3379	4465	rs4795538-T	rs4795538	0	4795538	intergenic_variant	1	NR	2e-09	8.69897		0.0153	[0.01-0.02] unit increase	Affymetrix, Illumina [20536782] (imputed)	N	total blood protein measurement	http://www.ebi.ac.uk/efo/EFO_0004536	GCST90018976	Genome-wide genotyping array
	2021-08-24	34021172	Christakoudi S	2021-05-21	Sci Rep	www.ncbi.nlm.nih.gov/pubmed/34021172	GWAS of allometric body-shape indices in UK Biobank identifies loci suggesting associations with morphogenesis, organogenesis, adrenal cell renewal and cancer.	Waist circumference adjusted for body mass index	186,825 British ancestry men	NA	17q11.2	17	30242066	RP11-354P11.2	SLC6A4 - SNORD63	ENSG00000108576	ENSG00000206989		6064	4691	rs5819889-AT	rs5819889	0	5819889	intergenic_variant	1	NR	6e-10	9.22185		0.03921	[0.027-0.052] unit decrease	Affymetrix [321114] (imputed)	N	BMI-adjusted waist circumference	http://www.ebi.ac.uk/efo/EFO_0007789	GCST012226	Genome-wide genotyping array
Yes	2017-03-31	27694959	Bonder MJ	2016-10-03	Nat Genet	www.ncbi.nlm.nih.gov/pubmed/27694959	The effect of host genetics on the gut microbiome.	Gut microbiota (functional units)	984 European ancestry individuals	530 European ancestry individuals	2p25.3	2	1851795	MYT1L	MYT1L			ENSG00000186487			rs4553849-A	rs4553849	0	4553849	intron_variant	0	NR	3e-08	7.52288	(PWY-4722_creatinine_degradation_II)	5.51509	NR Z-score increase	Illumina [8100000] (imputed)	N	gut microbiome measurement	http://www.ebi.ac.uk/efo/EFO_0007874	GCST003854	Genome-wide genotyping array
	2016-09-08	26252872	Li QS	2015-08-07	PLoS One	www.ncbi.nlm.nih.gov/pubmed/26252872	Variations in the FRA10AC1 Fragile Site and 15q21 Are Associated with Cerebrospinal Fluid AŒ≤1-42 Level.	Cognitive decline rate in late mild cognitive impairment	472 European ancestry cases, 47 cases	NA	2p25.3	2	1911740	MYT1L	MYT1L			ENSG00000186487			rs7584755-C	rs7584755	0	7584755	intron_variant	0	0.03	3e-07	6.52288		0.4674	[0.29-0.64] unit decrease	Illumina [~ 9000000] (imputed)	N	cognitive decline measurement	http://www.ebi.ac.uk/efo/EFO_0007710	GCST003075	Genome-wide genotyping array
	2017-06-02	28060188	Hamet P	2017-01-16	J Hypertens	www.ncbi.nlm.nih.gov/pubmed/28060188	PROX1 gene CC genotype as a major determinant of early onset of type 2 diabetes in slavic study participants from Action in Diabetes and Vascular Disease: Preterax and Diamicron MR Controlled Evaluation study.	Type 2 diabetes (age of onset)	2,307 Celtic ancestry individuals, 1,102 Slavic ancestry individuals	NA	2p25.3	2	1939845	MYT1L, PXDN, MYT1L-AS1	MYT1L			ENSG00000186487			rs12714314-?	rs12714314	0	12714314	intron_variant	0	NR	3e-06	5.52288	(Slavic)			Affymetrix [5045527] (imputed)	N	type 2 diabetes mellitus	http://purl.obolibrary.org/obo/MONDO_0005148	GCST004125	Genome-wide genotyping array
	2019-12-13	31530798	Alliey-Rodriguez N	2019-09-17	Transl Psychiatry	www.ncbi.nlm.nih.gov/pubmed/31530798	NRXN1 is associated with enlargement of the temporal horns of the lateral ventricles in psychosis.	Caudate nucleus volume	87 European ancestry Schizophrenia cases, 85 African American Schizophrenia cases, 15 Schizophrenia cases, 67 European ancestry Schizoaffective disorder cases, 53 African American Schizoaffective disorder cases, 7 Schizoaffective disorder cases, 130 European ancestry Bipolar disorders cases, 33 African American Bipolar disorders cases, 6 Bipolar disorders cases, 199 European ancestry controls, 79…	NA	2p25.3	2	1873446	MYT1L	MYT1L			ENSG00000186487			rs4519558-?	rs4519558	0	4519558	intron_variant	0	NR	5e-06	5.30103				Illumina [4322238] (imputed)	N	caudate nucleus volume	http://www.ebi.ac.uk/efo/EFO_0004830	GCST009257	Genome-wide genotyping array
	2019-07-19	31194736	Tiensuu H	2019-06-13	PLoS Genet	www.ncbi.nlm.nih.gov/pubmed/31194736	Risk of spontaneous preterm birth and fetal growth associates with fetal SLIT2.	Moderate-to-late spontaneous preterm birth	75 Finnish ancestry infant cases, 419 Finnish ancestry infant controls	NA	2p25.3	2	2105055	MYT1L	MYT1L			ENSG00000186487			rs72767375-?	rs72767375	0	72767375	intron_variant	0	NR	2e-06	5.69897		4.24		Illumina [6778521] (imputed)	N	spontaneous preterm birth	http://www.ebi.ac.uk/efo/EFO_0006917	GCST008179	Genome-wide genotyping array
	2019-03-18	30643258	Karlsson Linner R	2019-01-14	Nat Genet	www.ncbi.nlm.nih.gov/pubmed/30643258	Genome-wide association analyses of risk tolerance and risky behaviors in over 1 million individuals identify hundreds of loci and shared genetic influences.	Adventurousness	557,923 European ancestry individuals	NA	2p25.3	2	2209737	MYT1L	MYT1L			ENSG00000186487			rs61595816-A	rs61595816	0	61595816	intron_variant	0	0.8489	3e-08	7.52288		0.0150176	[0.0097-0.0203] unit decrease	Illumina [9339358] (imputed)	N	risk-taking behaviour	http://www.ebi.ac.uk/efo/EFO_0008579	GCST007324	Genome-wide genotyping array
	2019-09-24	31296530	Trendowski MR	2019-07-11	Clin Cancer Res	www.ncbi.nlm.nih.gov/pubmed/31296530	Clinical and Genome-Wide Analysis of Serum Platinum Levels after Cisplatin-Based Chemotherapy.	Serum platinum levels after completion of cisplatin chemotherapy	866 European ancestry individuals, 17 non-European ancestry individuals, 127 individuals	NR	2p25.3	2	2043625	NR	MYT1L			ENSG00000186487			rs6759709-G	rs6759709	0	6759709	intron_variant	0	0.2572	3e-07	6.52288		0.1671	[0.1-0.23] unit increase	Illumina [7305641] (imputed)	N	response to cisplatin, platinum measurement	http://purl.obolibrary.org/obo/GO_0072718, http://www.ebi.ac.uk/efo/EFO_0010154	GCST008756	Genome-wide genotyping array
	2009-05-07	18839057	Lesch KP	2008-10-07	J Neural Transm (Vienna)	www.ncbi.nlm.nih.gov/pubmed/18839057	Molecular genetics of adult ADHD: converging evidence from genome-wide association and extended pedigree linkage studies.	Attention deficit hyperactivity disorder	343 European ancestry cases, 250 European ancestry controls, 54 controls	NA	2p25.3	2	1922221	MYT1L	MYT1L			ENSG00000186487			rs2241685-?	rs2241685	0	2241685	intron_variant	0	NR	8e-06	5.09691				Affymetrix [504219]	N	attention deficit hyperactivity disorder	http://www.ebi.ac.uk/efo/EFO_0003888	GCST000246	Genome-wide genotyping array
	2016-12-01	27015805	Pilling LC	2016-03-23	Aging (Albany NY)	www.ncbi.nlm.nih.gov/pubmed/27015805	Human longevity is influenced by many genetic variants: evidence from 75,000 UK Biobank participants.	Parental longevity (combined parental age at death)	45,627 middle-aged British individuals	NA	2p25.3	2	1990737	NR	MYT1L			ENSG00000186487			rs60771529-?	rs60771529	0	60771529	intron_variant	0	NR	5e-06	5.30103		0.055638	[0.032-0.08] unit increase	Affymetrix [9658292] (imputed)	N	parental longevity	http://www.ebi.ac.uk/efo/EFO_0007796	GCST003394	Genome-wide genotyping array
Yes	2015-12-18	25574825	Baurecht H	2015-01-08	Am J Hum Genet	www.ncbi.nlm.nih.gov/pubmed/25574825	Genome-wide comparative analysis of atopic dermatitis and psoriasis gives insight into opposing genetic mechanisms.	Inflammatory skin disease	2,079 European ancestry atopic dermatitis cases, 4,212 European ancestry psoriasis cases, 11,899 European ancestry controls	NA	2p25.3	2	2221629	MYT1L	MYT1L			ENSG00000186487			rs6548123-?	rs6548123	0	6548123	intron_variant	0	NR	6e-08	7.22185	(Opposed)			Affymetrix, Illumina [~ 5200000]	N	atopic eczema, psoriasis	http://www.ebi.ac.uk/efo/EFO_0000274, http://www.ebi.ac.uk/efo/EFO_0000676	GCST002740	Genome-wide genotyping array
Yes	2017-08-04	27989323	Ahola-Olli AV	2016-12-13	Am J Hum Genet	www.ncbi.nlm.nih.gov/pubmed/27989323	Genome-wide Association Study Identifies 27 Loci Influencing Concentrations of Circulating Cytokines and Growth Factors.	Interleukin-8 levels	3,526 Finnish ancestry individuals	NA	2p25.3	2	1851346	NR	MYT1L			ENSG00000186487			rs116726256-C	rs116726256	0	116726256	intron_variant	0	NR	6e-06	5.22185		0.2184	[0.12-0.31] SD units increase	NR [10700000] (imputed)	N	interleukin-8 measurement	http://www.ebi.ac.uk/efo/EFO_0004811	GCST004445	Genome-wide genotyping array
	2018-09-05	29455858	Sung YJ	2018-02-15	Am J Hum Genet	www.ncbi.nlm.nih.gov/pubmed/29455858	A Large-Scale Multi-ancestry Genome-wide Study Accounting for Smoking Behavior Identifies Multiple Significant Loci for Blood Pressure.	Systolic blood pressure x smoking status (current vs non-current) interaction (2df test)	14,607 European ancestry current smokers, 65,935 European ancestry former and never smokers, 5,545 African ancestry current smokers, 21,571 African ancestry former and never smokers, 2,465 Asian ancestry current smokers, 10,973 Asian ancestry former and never smokers, 1,068 Hispanic current smokers, 7,737 Hispanic former and never smokers	48,198 European ancestry current smokers, 251,872 European ancestry former and never smokers, 1,971 African ancestry current smokers, 5,814 African ancestry former and never smokers, 29,485 Asian ancestry current smokers, 119,447 Asian ancestry former and never smokers, 3,737 Hispanic current smokers, 14,199 Hispanic former and never smokers	2p25.3	2	1889361	PXDN, MYT1L	MYT1L			ENSG00000186487			rs75247762-?	rs75247762	0	75247762	synonymous_variant	0	NR	1e-09	9	(African)			Affymetrix, Illumina [18800000] (imputed)	N	smoking status measurement, systolic blood pressure	http://www.ebi.ac.uk/efo/EFO_0006527, http://www.ebi.ac.uk/efo/EFO_0006335	GCST006195	Genome-wide genotyping array
	2019-03-28	30643251	Liu M	2019-01-14	Nat Genet	www.ncbi.nlm.nih.gov/pubmed/30643251	Association studies of up to 1.2 million individuals yield new insights into the genetic etiology of tobacco and alcohol use.	Smoking initiation (ever regular vs never regular) (MTAG)	up to 1,359,002 European ancestry individuals	NA	2p25.3	2	1900215	NR	MYT1L			ENSG00000186487			rs6737433-G	rs6737433	0	6737433	intron_variant	0	0.228	2e-09	8.69897		0.00771018	[0.0052-0.0102] unit increase	NR [9732723] (imputed)	N	smoking status measurement	http://www.ebi.ac.uk/efo/EFO_0006527	GCST007468	Genome-wide genotyping array
	2019-03-28	30643251	Liu M	2019-01-14	Nat Genet	www.ncbi.nlm.nih.gov/pubmed/30643251	Association studies of up to 1.2 million individuals yield new insights into the genetic etiology of tobacco and alcohol use.	Alcohol consumption (drinks per week) (MTAG)	up to 1,039,210 European ancestry individuals	NA	2p25.3	2	2005643	NR	MYT1L			ENSG00000186487			rs115056666-T	rs115056666	0	115056666	intron_variant	0	0.0665	8e-09	8.09691		0.0153424	[0.01-0.021] unit increase	NR [~ 9732723] (imputed)	N	alcohol consumption quality	http://purl.obolibrary.org/obo/OBA_1000840	GCST007472	Genome-wide genotyping array
	2019-03-28	30787463	Escala-Garcia M	2019-02-21	Br J Cancer	www.ncbi.nlm.nih.gov/pubmed/30787463	Genome-wide association study of germline variants and breast cancer-specific mortality.	Breast cancer specific mortality in estrogen receptor negative breast cancer	2,125 European ancestry cases, 14,047 European ancestry controls	NA	2p25.3	2	2250596	NR	MYT1L			ENSG00000186487			rs1895136-?	rs1895136	0	1895136	intron_variant	0	NR	2e-06	5.69897		0.863013	[0.81-0.92]	Affymetrix, Illumina [~ 10400000] (imputed)	N	mortality	http://www.ebi.ac.uk/efo/EFO_0004352	GCST007476	Genome-wide genotyping array
Yes	2020-08-14	32572223	Hughes DA	2020-06-22	Nat Microbiol	www.ncbi.nlm.nih.gov/pubmed/32572223	Genome-wide associations of human gut microbiome variation and implications for causal inference analyses.	Gut microbiota (bacterial taxa, hurdle binary method)	2,223 European ancestry individuals	1,667 European ancestry individuals	2p25.3	2	1819456	MYT1L	MYT1L			ENSG00000186487			rs72765564-T	rs72765564	0	72765564	intron_variant	0	0.0408682	4e-08	7.39794	(G_Lactococcus_HB)	0.862714	[0.55-1.17] unit increase	Illumina [7711310] (imputed)	N	gut microbiome measurement	http://www.ebi.ac.uk/efo/EFO_0007874	GCST010396	Genome-wide genotyping array
	2024-01-23	35984985	Park HA	2022-08-19	Cancer Epidemiol Biomarkers Prev	www.ncbi.nlm.nih.gov/pubmed/35984985	Predictive polygenic score for outcome after first-line oxaliplatin-based chemotherapy in colorectal cancer patients using supervised principal component analysis.	Overall survival in metastatic stage IV colorectal cancer x oxaliplatin treatment interaction	338 European ancestry cases with oxaliplatin treatment, 96 European ancestry cases with other treatment, 8 Asian ancestry cases with oxaliplatin treatment, 26 African American cases with oxaliplatin treatment, 10 African American cases with other treatment, 26 cases with oxaliplatin treatment, 1 case with other treatment	NA	2p25.3	2	2178514		MYT1L			ENSG00000186487			rs115226504-?	rs115226504	0	115226504	intron_variant	0	NR	5e-08	7.30103				Illumina [4695046] (imputed)	N	metastatic colorectal cancer, overall survival, trait in response to oxaliplatin	http://www.ebi.ac.uk/efo/EFO_1001480, http://www.ebi.ac.uk/efo/EFO_0000638, http://purl.obolibrary.org/obo/OBA_2050333	GCST90308766	Genome-wide genotyping array
	2024-01-11	35606283	Son JH	2022-05-17	Respir Med	www.ncbi.nlm.nih.gov/pubmed/35606283	A genome-wide association study on frequent exacerbation of asthma depending on smoking status.	Annual frequency of asthma exacerbations	608 individuals	NA	2p25.3	2	2280531		MYT1L			ENSG00000186487			rs10519519-A	rs10519519	0	10519519	intron_variant	0	NR	1e-07	7		0.6	[0.38-0.82] unit increase	Illumina [373456]	N	asthma exacerbation measurement	http://www.ebi.ac.uk/efo/EFO_0007614	GCST90132282	Genome-wide genotyping array
	2024-01-11	35606283	Son JH	2022-05-17	Respir Med	www.ncbi.nlm.nih.gov/pubmed/35606283	A genome-wide association study on frequent exacerbation of asthma depending on smoking status.	Annual frequency of asthma exacerbations in non-smokers	420 individuals	NA	2p25.3	2	2280531		MYT1L			ENSG00000186487			rs10519519-A	rs10519519	0	10519519	intron_variant	0	NR	4e-06	5.39794		0.62	[0.37-0.87] unit increase	Illumina [374098]	N	asthma exacerbation measurement	http://www.ebi.ac.uk/efo/EFO_0007614	GCST90132283	Genome-wide genotyping array
	2024-07-22	38990837	Francis M	2024-07-11	PLoS Genet	www.ncbi.nlm.nih.gov/pubmed/38990837	Gene-vegetarianism interactions in calcium, estimated glomerular filtration rate, and testosterone identified in genome-wide analysis across 30 biomarkers.	Apolipoprotein B levels (adjusted for BMI) x vegetarianism interaction	146,286 European ancestry individuals	NA	2p25.3	2	2113098		MYT1L			ENSG00000186487			rs751150-A	rs751150	0	751150	intron_variant	0	0.672498	9e-06	5.04576		0.134021	[0.075-0.193] unit decrease	NR [7934157] (imputed)	N	diet measurement, apolipoprotein B measurement	http://www.ebi.ac.uk/efo/EFO_0008111, http://www.ebi.ac.uk/efo/EFO_0004615	GCST90161208	Genome-wide genotyping array
	2024-07-22	38990837	Francis M	2024-07-11	PLoS Genet	www.ncbi.nlm.nih.gov/pubmed/38990837	Gene-vegetarianism interactions in calcium, estimated glomerular filtration rate, and testosterone identified in genome-wide analysis across 30 biomarkers.	Direct low density lipoprotein cholesterol levels (adjusted for BMI) x vegetarianism interaction	146,635 European ancestry individuals	NA	2p25.3	2	2113098		MYT1L			ENSG00000186487			rs751150-A	rs751150	0	751150	intron_variant	0	0.672524	1e-06	6		0.148532	[0.089-0.208] unit decrease	NR [7934157] (imputed)	N	diet measurement, low density lipoprotein cholesterol measurement	http://www.ebi.ac.uk/efo/EFO_0008111, http://www.ebi.ac.uk/efo/EFO_0004611	GCST90161220	Genome-wide genotyping array
	2024-07-22	38990837	Francis M	2024-07-11	PLoS Genet	www.ncbi.nlm.nih.gov/pubmed/38990837	Gene-vegetarianism interactions in calcium, estimated glomerular filtration rate, and testosterone identified in genome-wide analysis across 30 biomarkers.	Direct low density lipoprotein cholesterol levels x vegetarianism interaction	146,960 European ancestry individuals	NA	2p25.3	2	2113098		MYT1L			ENSG00000186487			rs751150-A	rs751150	0	751150	intron_variant	0	0.672523	3e-06	5.52288		0.146131	[0.085-0.207] unit decrease	NR [7934157] (imputed)	N	diet measurement, low density lipoprotein cholesterol measurement	http://www.ebi.ac.uk/efo/EFO_0008111, http://www.ebi.ac.uk/efo/EFO_0004611	GCST90161190	Genome-wide genotyping array
	2022-08-30	32193382	Cole JB	2020-03-19	Nat Commun	www.ncbi.nlm.nih.gov/pubmed/32193382	Comprehensive genomic analysis of dietary habits in UK Biobank identifies hundreds of genetic associations.	Alcohol consumption (drinks per month) (UKB data field 1578, 4424)	449,210 European ancestry individuals	NA	2p25.3	2	2201698		MYT1L			ENSG00000186487			rs376122867-CAA	rs376122867	1	34259469	intron_variant	0	0.839807	3e-08	7.52288		0.0159836	[0.01-0.022] unit decrease	NR [NR] (imputed)	N	alcohol consumption quality	http://purl.obolibrary.org/obo/OBA_1000840	GCST90132992	Genome-wide genotyping array
	2022-12-14	36477530	Saunders GRB	2022-12-07	Nature	www.ncbi.nlm.nih.gov/pubmed/36477530	Genetic diversity fuels gene discovery for tobacco and alcohol use.	Drinks per week	2,965,643 European ancestry, East Asian ancestry, Hispanic or Latin American, African ancestry individuals	NA	2p25.3	2	2132516		MYT1L			ENSG00000186487			rs191237460-C	rs191237460	0	191237460	intron_variant	0	0.0462	5e-10	9.30103		0.0125	[0.0085-0.0165] unit increase	NR [NR] (imputed)	N	alcohol consumption quality	http://purl.obolibrary.org/obo/OBA_1000840	GCST90243989	Genome-wide genotyping array, Genome-wide sequencing
	2023-01-12	35712048	Pain O	2022-04-01	Biol Psychiatry Glob Open Sci	www.ncbi.nlm.nih.gov/pubmed/35712048	Identifying the Common Genetic Basis of Antidepressant Response.	Remission after antidepressant treatment in major depressive disorder	1,852 European ancestry cases, 3,299 European ancestry controls	NA	2p25.3	2	1956508		MYT1L			ENSG00000186487			rs545208792-?	rs545208792	0	545208792	intron_variant	0	0.603	3e-06	5.52288		0.71979	[0.58-0.86]	Affymetrix, Illumina [8681460] (imputed)	N	response to antidepressant	http://purl.obolibrary.org/obo/GO_0036276	GCST90244577	Genome-wide genotyping array
	2022-12-14	36477530	Saunders GRB	2022-12-07	Nature	www.ncbi.nlm.nih.gov/pubmed/36477530	Genetic diversity fuels gene discovery for tobacco and alcohol use.	Drinks per week	2,428,851 European ancestry individuals	NA	2p25.3	2	2208333		MYT1L			ENSG00000186487			rs17338491-A	rs17338491	0	17338491	intron_variant	0	0.146	2e-09	8.69897		0.00774	[0.0052-0.0102] unit increase	NR [NR] (imputed)	N	alcohol consumption quality	http://purl.obolibrary.org/obo/OBA_1000840	GCST90243984	Genome-wide genotyping array, Genome-wide sequencing
	2022-12-21	36477530	Saunders GRB	2022-12-07	Nature	www.ncbi.nlm.nih.gov/pubmed/36477530	Genetic diversity fuels gene discovery for tobacco and alcohol use.	Smoking initiation	2,669,029 European ancestry individuals	NA	2p25.3	2	1900215		MYT1L			ENSG00000186487			rs6737433-G	rs6737433	0	6737433	intron_variant	0	0.227	6e-12	11.2218		0.00712	[0.0051-0.0091] unit increase	NR [NR] (imputed)	N	smoking initiation	http://www.ebi.ac.uk/efo/EFO_0005670	GCST90243968	Genome-wide genotyping array, Genome-wide sequencing
	2023-03-08	36581621	Huang J	2022-12-29	Nat Commun	www.ncbi.nlm.nih.gov/pubmed/36581621	Genomics and phenomics of body mass index reveals a complex disease network.	Body mass index	1,122,049 European ancestry individuals	NA	2p25.3	2	2188978		MYT1L			ENSG00000186487			rs6709211-G	rs6709211	0	6709211	intron_variant	0	NR	2e-10	9.69897		0.0133	[0.0092-0.0174] unit increase	Affymetrix [NR] (imputed)	N	body mass index	http://www.ebi.ac.uk/efo/EFO_0004340	GCST90255621	Genome-wide genotyping array
	2023-08-02	37009413	Bai H	2023-03-29	MedComm (2020)	www.ncbi.nlm.nih.gov/pubmed/37009413	Genome-wide association study of tuberculosis in the western Chinese Han and Tibetan population.	Tuberculosis	up to 1,532 Chinese Han ancestry cases aged <45 years, up to 1,584 Chinese Han ancestry controls aged <45 years	NA	2p25.3	2	2072748		MYT1L			ENSG00000186487			rs7607919-A	rs7607919	0	7607919	intron_variant	0	NR	2e-06	5.69897		2.109	[1.547-2.873]	Illumina [NR] (imputed)	N	tuberculosis	http://purl.obolibrary.org/obo/MONDO_0018076	GCST90275070	Genome-wide genotyping array
	2023-08-02	37009413	Bai H	2023-03-29	MedComm (2020)	www.ncbi.nlm.nih.gov/pubmed/37009413	Genome-wide association study of tuberculosis in the western Chinese Han and Tibetan population.	Tuberculosis	1,532 Chinese Han ancestry cases, 1,584 Chinese Han ancestry controls	NA	2p25.3	2	2156032		MYT1L			ENSG00000186487			rs75609205-A	rs75609205	0	75609205	intron_variant	0	NR	3e-12	11.5229	(additive model)	2.327	[1.826-2.965]	Illumina [4096530] (imputed)	N	tuberculosis	http://purl.obolibrary.org/obo/MONDO_0018076	GCST90275067	Genome-wide genotyping array
	2023-08-02	37009413	Bai H	2023-03-29	MedComm (2020)	www.ncbi.nlm.nih.gov/pubmed/37009413	Genome-wide association study of tuberculosis in the western Chinese Han and Tibetan population.	Pulmonary tuberculosis	1,202 Chinese Han ancestry cases, 1,584 Chinese Han ancestry controls	NA	2p25.3	2	2072748		MYT1L			ENSG00000186487			rs7607919-A	rs7607919	0	7607919	intron_variant	0	NR	1e-07	7		2.079	[1.588-2.722]	Illumina [NR] (imputed)	N	pulmonary tuberculosis	http://www.ebi.ac.uk/efo/EFO_1000049	GCST90275073	Genome-wide genotyping array
	2019-03-25	30704525	Guyatt AL	2019-01-31	Hum Genomics	www.ncbi.nlm.nih.gov/pubmed/30704525	A genome-wide association study of mitochondrial DNA copy number in two population-based cohorts.	Mitochondrial DNA copy number (white blood cells)	1,333 males	NA	2p25.3	2	1965932	MYT1L	MYT1L			ENSG00000186487			rs11687359-A	rs11687359	0	11687359	intron_variant	0	NR	3e-07	6.52288		0.401	[0.25-0.55] unit increase	Illumina [7369986] (imputed)	N	mitochondrial DNA measurement	http://www.ebi.ac.uk/efo/EFO_0006312	GCST007392	Genome-wide genotyping array
	2019-08-21	31324189	Kim W	2019-07-19	Respir Res	www.ncbi.nlm.nih.gov/pubmed/31324189	DSP variants may be associated with longitudinal change in quantitative emphysema.	Emphysema annual change measurement in smokers (adjusted lung density)	4,427 European ancestry individuals, 1,158 African American individuals	NA	2p25.3	2	1803006	MYT1L	MYT1L			ENSG00000186487			rs11893101-A	rs11893101	0	11893101	intron_variant	0	NR	3e-06	5.52288		0.227	[0.13-0.32] unit decrease	Illumina [NR] (imputed)	N	emphysema imaging measurement	http://www.ebi.ac.uk/efo/EFO_0007626	GCST008477	Genome-wide genotyping array
	2022-03-10	34732054	Yang Y	2021-11-04	Circ Genom Precis Med	www.ncbi.nlm.nih.gov/pubmed/34732054	Identification of Functional Genetic Determinants of Cardiac Troponin T and I in a Multiethnic Population and Causal Associations With Atrial Fibrillation.	High-sensitivity cardiac troponin I concentration	1,606 African American individuals	NA	2p25.3	2	1870652		MYT1L			ENSG00000186487			rs79645452-?	rs79645452	0	79645452	intron_variant	0	NR	4e-06	5.39794		0.4	[0.23-0.57] unit decrease	Affymetrix, Illumina [NR] (imputed)	N	cardiac troponin I measurement	http://www.ebi.ac.uk/efo/EFO_0010071	GCST90095177	Genome-wide genotyping array
	2022-07-01	35361970	Okbay A	2022-03-31	Nat Genet	www.ncbi.nlm.nih.gov/pubmed/35361970	Polygenic prediction of educational attainment within and between families from genome-wide association analyses in 3 million individuals.	Educational attainment	3,037,499 European ancestry individuals	NA	2p25.3	2	1900215		MYT1L			ENSG00000186487			rs6737433-C	rs6737433	0	6737433	intron_variant	0	0.7747	5e-14	13.301		0.0094532	[0.007-0.0119] unit increase	Illumina [10675380] (imputed)	N	educational attainment	http://www.ebi.ac.uk/efo/EFO_0011015	GCST90105038	Genome-wide genotyping array
	2022-07-01	35361970	Okbay A	2022-03-31	Nat Genet	www.ncbi.nlm.nih.gov/pubmed/35361970	Polygenic prediction of educational attainment within and between families from genome-wide association analyses in 3 million individuals.	Educational attainment	3,037,499 European ancestry individuals	NA	2p25.3	2	2098915		MYT1L			ENSG00000186487			rs6755567-A	rs6755567	0	6755567	intron_variant	0	0.7541	1e-08	8		0.00689942	[0.0045-0.0093] unit increase	Illumina [10675380] (imputed)	N	educational attainment	http://www.ebi.ac.uk/efo/EFO_0011015	GCST90105038	Genome-wide genotyping array
	2022-09-27	35396580	Trubetskoy V	2022-04-08	Nature	www.ncbi.nlm.nih.gov/pubmed/35396580	Mapping genomic loci implicates genes and synaptic biology in schizophrenia.	Schizophrenia	53,386 European ancestry cases, 77,258 European ancestry controls, 14,004 East Asian ancestry cases, 16,757 East Asian ancestry controls, 6,152 African American cases, 3,918 African American controls, 1,234 Latino cases, 3,090 Latino controls	1,979 European ancestry cases, 142,626 European ancestry controls	2p25.3	2	2312029		MYT1L			ENSG00000186487			rs17247190-A	rs17247190	0	17247190	intron_variant	0	0.798	9e-08	7.04576		0.95313	[0.94-0.97]	Affymetrix [7585078] (imputed)	N	schizophrenia	http://purl.obolibrary.org/obo/MONDO_0005090	GCST90128471	Genome-wide genotyping array
	2023-12-12	37359372	Nardone GG	2023-06-09	Front Genet	www.ncbi.nlm.nih.gov/pubmed/37359372	Identifying missing pieces in color vision defects: a genome-wide association study in Silk Road populations.	Color vision defects (Tritan)	12 Silk Road (founder/genetic isolate) cases, 508 Silk Road (founder/genetic isolate) controls	NA	2p25.3	2	1965593		MYT1L			ENSG00000186487			rs141038860-T	rs141038860	0	141038860	intron_variant	0	0.988	6e-06	5.22185		0.188689	[0.11-0.27] unit decrease	Illumina [7783479] (imputed)	N	color vision disorder	http://purl.obolibrary.org/obo/MONDO_0001703	GCST90301671	Genome-wide genotyping array
	2023-02-09	36224396	Yengo L	2022-10-12	Nature	www.ncbi.nlm.nih.gov/pubmed/36224396	A saturated map of common genetic variants associated with human height.	Height	5,314,291 European ancestry, Hispanic or Latin American, East Asian ancestry, African ancestry, South Asian ancestry individuals	NA	2p25.3	2	1803107		MYT1L			ENSG00000186487			rs13006826-T	rs13006826	0	13006826	intron_variant	0	0.37	2e-11	10.699		0.0043	[0.0031-0.0055] unit decrease	Affymetrix, Illumina [1385132] (imputed)	N	body height	http://purl.obolibrary.org/obo/OBA_VT0001253	GCST90245848	Genome-wide genotyping array
	2025-02-07	39753749	Dang X	2025-01-03	Nat Hum Behav	www.ncbi.nlm.nih.gov/pubmed/39753749	Gene-level analysis reveals the genetic aetiology and therapeutic targets of schizophrenia.	Schizophrenia	29,519 East Asian ancestry cases, 44,392 East Asian ancestry controls, 59,901 European ancestry cases, 441,418 European ancestry controls, 1,234 Latino cases, 3,090 Latino controls, 6,152 African American cases, 3,918 African American controls	NA	2p25.3	2	2312029		MYT1L			ENSG00000186487			rs17247190-?	rs17247190	0	17247190	intron_variant	0	NR	2e-09	8.69897				Illumina [NR] (imputed)	N	schizophrenia	http://purl.obolibrary.org/obo/MONDO_0005090	GCST90503210	Genome-wide genotyping array
	2024-03-28	37500982	He D	2023-07-27	Osteoporos Int	www.ncbi.nlm.nih.gov/pubmed/37500982	A longitudinal genome-wide association study of bone mineral density mean and variability in the UK Biobank.	Bone mineral density variability	141,261 European ancestry individuals	NA	2p25.3	2	1913444		MYT1L			ENSG00000186487			rs74926462-?	rs74926462	0	74926462	intron_variant	0	NR	2e-08	7.69897				NR [NR] (imputed)	N	bone density	http://purl.obolibrary.org/obo/OBA_1000110	GCST90321119	Genome-wide genotyping array
	2022-02-24	35115689	Qin Y	2022-02-03	Nat Genet	www.ncbi.nlm.nih.gov/pubmed/35115689	Combined effects of host genetics and diet on human gut microbiota and incident disease in a single population cohort.	Coprobacillus cateniformis abundance in stool	5,959 Finnish ancestry individuals	NA	2p25.3	2	2300127		MYT1L			ENSG00000186487			rs115357073-A	rs115357073	0	115357073	intron_variant	0	0.0187817	4e-08	7.39794		0.219351	[0.14-0.3] unit increase	Illumina [7980478] (imputed)	N	gut microbiome measurement	http://www.ebi.ac.uk/efo/EFO_0007874	GCST90032333	Genome-wide genotyping array
	2022-02-24	35115689	Qin Y	2022-02-03	Nat Genet	www.ncbi.nlm.nih.gov/pubmed/35115689	Combined effects of host genetics and diet on human gut microbiota and incident disease in a single population cohort.	Coprobacillus abundance in stool	5,959 Finnish ancestry individuals	NA	2p25.3	2	2300127		MYT1L			ENSG00000186487			rs115357073-A	rs115357073	0	115357073	intron_variant	0	0.0187817	3e-08	7.52288		0.246673	[0.16-0.33] unit increase	Illumina [7980478] (imputed)	N	gut microbiome measurement	http://www.ebi.ac.uk/efo/EFO_0007874	GCST90032334	Genome-wide genotyping array
	2022-12-14	36477530	Saunders GRB	2022-12-07	Nature	www.ncbi.nlm.nih.gov/pubmed/36477530	Genetic diversity fuels gene discovery for tobacco and alcohol use.	Smoking initiation	3,382,012 European ancestry, East Asian ancestry, Hispanic or Latin American, African ancestry individuals	NA	2p25.3	2	1877687		MYT1L			ENSG00000186487			rs4557004-C	rs4557004	0	4557004	intron_variant	0	0.288	3e-11	10.5229		0.00567	[0.004-0.0073] unit increase	NR [NR] (imputed)	N	smoking initiation	http://www.ebi.ac.uk/efo/EFO_0005670	GCST90243985	Genome-wide genotyping array, Genome-wide sequencing
	2022-12-14	36477530	Saunders GRB	2022-12-07	Nature	www.ncbi.nlm.nih.gov/pubmed/36477530	Genetic diversity fuels gene discovery for tobacco and alcohol use.	Smoking initiation	3,382,012 European ancestry, East Asian ancestry, Hispanic or Latin American, African ancestry individuals	NA	2p25.3	2	1877704		MYT1L			ENSG00000186487			rs12466100-C	rs12466100	0	12466100	intron_variant	0	0.289	1e-11	11		0.00573	[0.0041-0.0074] unit increase	NR [NR] (imputed)	N	smoking initiation	http://www.ebi.ac.uk/efo/EFO_0005670	GCST90243985	Genome-wide genotyping array, Genome-wide sequencing
	2021-12-14	34594039	Sakaue S	2021-09-30	Nat Genet	www.ncbi.nlm.nih.gov/pubmed/34594039	A cross-population atlas of genetic associations for 220 human phenotypes.	Weight	360,116 European ancestry individuals, 165,419 East Asian ancestry individuals	NA	2p25.3	2	1858366		MYT1L			ENSG00000186487			rs146196645-ATCCGACTGC	rs146196645	0	146196645	intron_variant	0	NR	2e-08	7.69897		0.0095	[0.0062-0.0128] unit increase	Affymetrix, Illumina [20539548] (imputed)	N	body weight	http://www.ebi.ac.uk/efo/EFO_0004338	GCST90018949	Genome-wide genotyping array
	2014-05-02	24159190	Seppala I	2013-10-24	Eur Heart J	www.ncbi.nlm.nih.gov/pubmed/24159190	Genome-wide association study on dimethylarginines reveals novel AGXT2 variants associated with heart rate variability but not with overall mortality.	Serum dimethylarginine levels (asymmetric/symetric ratio)	5110 European ancestry individuals	NA	2p25.3	2	2541962	NR	MYT1L - LINC01250	ENSG00000186487	ENSG00000234423		210298	351607	rs181867028-T	rs181867028	0	181867028	intergenic_variant	1	0.004	8e-06	5.09691		0.911	[0.51-1.31] unit decrease	Affymetrix, Illumina [10085758] (imputed)	N	serum dimethylarginine amount	http://purl.obolibrary.org/obo/OBA_2050060	GCST002242	Genome-wide genotyping array
	2013-03-05	23218918	Sprooten E	2012-12-04	Psychiatry Res	www.ncbi.nlm.nih.gov/pubmed/23218918	White matter integrity as an intermediate phenotype: exploratory genome-wide association analysis in individuals at high risk of bipolar disorder.	White matter integrity	70 unaffected relatives of cases with bipolar disorder, 80 controls	NA	2p25.3	2	2586609	intergenic	MYT1L - LINC01250	ENSG00000186487	ENSG00000234423		254945	306960	rs2598592-?	rs2598592	0	2598592	intergenic_variant	1	0.39	7e-06	5.1549				Illumina [565404]	N	white matter integrity	http://www.ebi.ac.uk/efo/EFO_0004641	GCST001760	Genome-wide genotyping array
	2017-12-01	28928442	Tian C	2017-09-19	Nat Commun	www.ncbi.nlm.nih.gov/pubmed/28928442	Genome-wide association and HLA region fine-mapping studies identify susceptibility loci for multiple common infections.	Childhood ear infection	46,936 European ancestry cases, 74,874 European ancestry controls	NA	2p25.3	2	2544523	NR	MYT1L - LINC01250	ENSG00000186487	ENSG00000234423		212859	349046	rs112624028-?	rs112624028	0	112624028	intergenic_variant	1	NR	2e-06	5.69897		0.0419	[0.025-0.059] unit increase	Illumina [at least 560000] (imputed)	N	susceptibility to childhood ear infection measurement	http://www.ebi.ac.uk/efo/EFO_0007904	GCST005013	Genome-wide genotyping array
	2017-12-01	28928442	Tian C	2017-09-19	Nat Commun	www.ncbi.nlm.nih.gov/pubmed/28928442	Genome-wide association and HLA region fine-mapping studies identify susceptibility loci for multiple common infections.	Mononucleosis	17,457 European ancestry cases, 68,446 European ancestry controls	NA	2p25.3	2	2696646	NR	MYT1L - LINC01250	ENSG00000186487	ENSG00000234423		364982	196923	rs59171290-?	rs59171290	0	59171290	intergenic_variant	1	NR	9e-06	5.04576		0.0896	[0.05-0.129] unit increase	Illumina [at least 560000] (imputed)	N	susceptibility to mononucleosis measurement	http://www.ebi.ac.uk/efo/EFO_0008403	GCST005002	Genome-wide genotyping array
	2018-09-06	29898447	Alaraudanjoki VK	2018-06-13	Caries Res	www.ncbi.nlm.nih.gov/pubmed/29898447	Genome-Wide Association Study of Erosive Tooth Wear in a Finnish Cohort.	Erosive tooth wear (severe vs non-severe)	86 Finnish ancestry male severe erosion cases, 50 Finnish ancestry female severe erosion cases, 817 Finnish ancestry male non-severe erosion controls, 991 Finnish ancestry female non-severe erosion controls	NA	2p25.3	2	1778809	PXDN, MYT1L	PXDN - MYT1L	ENSG00000130508	ENSG00000186487		33957	10304	rs11681214-?	rs11681214	0	11681214	intergenic_variant	1	NR	4e-08	7.39794		3.5	[2.10-5.83]	Illumina [NR] (imputed)	N	erosive tooth wear attribute	http://purl.obolibrary.org/obo/OBA_2045285	GCST006218	Genome-wide genotyping array
	2018-09-06	29898447	Alaraudanjoki VK	2018-06-13	Caries Res	www.ncbi.nlm.nih.gov/pubmed/29898447	Genome-Wide Association Study of Erosive Tooth Wear in a Finnish Cohort.	Erosive tooth wear (severe vs non-severe)	86 Finnish ancestry male severe erosion cases, 50 Finnish ancestry female severe erosion cases, 817 Finnish ancestry male non-severe erosion controls, 991 Finnish ancestry female non-severe erosion controls	NA	2p25.3	2	1778365	NR	PXDN - MYT1L	ENSG00000130508	ENSG00000186487		33513	10748	rs6711954-?	rs6711954	0	6711954	intergenic_variant	1	NR	5e-06	5.30103				Illumina [NR] (imputed)	N	erosive tooth wear attribute	http://purl.obolibrary.org/obo/OBA_2045285	GCST006218	Genome-wide genotyping array
	2018-09-06	29898447	Alaraudanjoki VK	2018-06-13	Caries Res	www.ncbi.nlm.nih.gov/pubmed/29898447	Genome-Wide Association Study of Erosive Tooth Wear in a Finnish Cohort.	Erosive tooth wear (severe vs non-severe)	86 Finnish ancestry male severe erosion cases, 50 Finnish ancestry female severe erosion cases, 817 Finnish ancestry male non-severe erosion controls, 991 Finnish ancestry female non-severe erosion controls	NA	2p25.3	2	1780659	NR	PXDN - MYT1L	ENSG00000130508	ENSG00000186487		35807	8454	rs189422469-?	rs189422469	0	189422469	intergenic_variant	1	NR	9e-06	5.04576				Illumina [NR] (imputed)	N	erosive tooth wear attribute	http://purl.obolibrary.org/obo/OBA_2045285	GCST006218	Genome-wide genotyping array
	2018-09-06	29898447	Alaraudanjoki VK	2018-06-13	Caries Res	www.ncbi.nlm.nih.gov/pubmed/29898447	Genome-Wide Association Study of Erosive Tooth Wear in a Finnish Cohort.	Erosive tooth wear (severe vs none or mild)	136 Finnish ancestry severe erosion cases, 1011 Finnish ancestry mild or no erosion controls	NA	2p25.3	2	1778809	PXDN, MYT1L	PXDN - MYT1L	ENSG00000130508	ENSG00000186487		33957	10304	rs11681214-?	rs11681214	0	11681214	intergenic_variant	1	NR	5e-06	5.30103				Illumina [NR] (imputed)	N	erosive tooth wear attribute	http://purl.obolibrary.org/obo/OBA_2045285	GCST006226	Genome-wide genotyping array
	2019-02-08	29160301	Fabbri C	2017-11-21	Pharmacogenomics J	www.ncbi.nlm.nih.gov/pubmed/29160301	New insights into the pharmacogenomics of antidepressant response from the GENDEP and STAR*D studies: rare variant analysis and high-density imputation.	Response to antidepressants (symptom remission)	2,145 European ancestry individuals	NA	2p25.3	2	2404302	NR	MYT1L - LINC01250	ENSG00000186487	ENSG00000234423		72638	489267	rs74442120-?	rs74442120	0	74442120	intergenic_variant	1	NR	2e-06	5.69897		3.95883	NR	Affymetrix, Illumina [7062950] (imputed)	N	response to antidepressant	http://purl.obolibrary.org/obo/GO_0036276	GCST007061	Genome-wide genotyping array
	2019-05-21	30595370	Kichaev G	2018-12-27	Am J Hum Genet	www.ncbi.nlm.nih.gov/pubmed/30595370	Leveraging Polygenic Functional Enrichment to Improve GWAS Power.	Height	approximately 458,000 European ancestry individuals	NA	2p25.3	2	1759737		PXDN - MYT1L	ENSG00000130508	ENSG00000186487		14885	29376	rs2382562-?	rs2382562	0	2382562	intergenic_variant	1	NR	2e-14	13.699				NR [~ 8900000] (imputed)	N	body height	http://purl.obolibrary.org/obo/OBA_VT0001253	GCST007841	Genome-wide genotyping array
	2022-07-04	33462482	Ruhlemann MC	2021-01-18	Nat Genet	www.ncbi.nlm.nih.gov/pubmed/33462482	Genome-wide association study in 8,956 German individuals identifies influence of ABO histo-blood groups on gut microbiome.	G_Porphyromonadaceae abundance	8,956 German ancestry individuals	NA	2p25.3	2	2824202		MYT1L - LINC01250	ENSG00000186487	ENSG00000234423		492538	69367	rs823223-?	rs823223	0	823223	intergenic_variant	1	NR	4e-07	6.39794		0.216919	[0.13-0.3] unit decrease	NR [6900000] (imputed)	N	gut microbiome measurement	http://www.ebi.ac.uk/efo/EFO_0007874	GCST90011339	Genome-wide genotyping array
	2011-04-13	21441570	Grassi MA	2011-03-26	Hum Mol Genet	www.ncbi.nlm.nih.gov/pubmed/21441570	Genome-wide meta-analysis for severe diabetic retinopathy.	Diabetic retinopathy	973 European ancestry cases, 1,856 European ancestry controls	NA	2p25.3	2	2515741	MYT1L, LOC7029897	MYT1L - LINC01250	ENSG00000186487	ENSG00000234423		184077	377828	rs10199521-T	rs10199521	0	10199521	intergenic_variant	1	0.22	3e-06	5.52288		1.46	[NR]	Affymetrix, Illumina [2543887] (imputed)	N	diabetic retinopathy	http://www.ebi.ac.uk/efo/EFO_0003770	GCST001017	Genome-wide genotyping array
	2010-04-06	20195266	Adkins DE	2010-03-02	Mol Psychiatry	www.ncbi.nlm.nih.gov/pubmed/20195266	Genomewide pharmacogenomic study of metabolic side effects to antipsychotic drugs.	Response to antipsychotic treatment	421 European ancestry, 214 African American, and 103 cases	NA	2p25.3	2	1773378	intergenic	PXDN - MYT1L	ENSG00000130508	ENSG00000186487		28526	15735	rs6735179-?	rs6735179	0	6735179	intergenic_variant	1	0.346	1e-07	7	(perphenazine-triglycerides)			Affymetrix [492900]	N	response to perphenazine	http://purl.obolibrary.org/obo/GO_0097334	GCST000618	Genome-wide genotyping array
	2017-03-24	27622933	Li QS	2016-09-13	Transl Psychiatry	www.ncbi.nlm.nih.gov/pubmed/27622933	Analysis of 23andMe antidepressant efficacy survey data: implication of circadian rhythm and neuroplasticity in bupropion response.	Response to selective serotonin reuptake inhibitors and depression	6,348 European ancestry responder cases, 191,357 European ancestry healthy controls	NA	2p25.3	2	2696619	MYT1L, TSSC1	MYT1L - LINC01250	ENSG00000186487	ENSG00000234423		364955	196950	rs61519662-?	rs61519662	0	61519662	intergenic_variant	1	NR	2e-06	5.69897		1.10132	[1.06-1.15]	Illumina [~ 12000000] (imputed)	N	response to selective serotonin reuptake inhibitor, mood disorder, major depressive disorder	http://www.ebi.ac.uk/efo/EFO_0005658, http://www.ebi.ac.uk/efo/EFO_0004247, http://purl.obolibrary.org/obo/MONDO_0002009	GCST003809	Genome-wide genotyping array
	2017-03-17	27089181	Okbay A	2016-04-18	Nat Genet	www.ncbi.nlm.nih.gov/pubmed/27089181	Genetic variants associated with subjective well-being, depressive symptoms, and neuroticism identified through genome-wide analyses.	Neuroticism	170,911 European ancestry individuals	NA	2p25.3	2	2771967	NR	MYT1L - LINC01250	ENSG00000186487	ENSG00000234423		440303	121602	rs67723639-A	rs67723639	0	67723639	intergenic_variant	1	0.094	3e-06	5.52288		0.0276203	[0.016-0.039] unit decrease	Affymetrix [up to 6544775] (imputed)	N	neuroticism measurement	http://www.ebi.ac.uk/efo/EFO_0007660	GCST003770	Genome-wide genotyping array
	2015-09-22	25524916	Palmer ND	2014-12-18	Diabetes	www.ncbi.nlm.nih.gov/pubmed/25524916	Genetic Variants Associated With Quantitative Glucose Homeostasis Traits Translate to Type 2 Diabetes in Mexican Americans: The GUARDIAN (Genetics Underlying Diabetes in Hispanics) Consortium.	Glucose homeostasis traits	up to 4,176 Mexican American individuals	NA	2p25.3	2	2729105	MYT1L, TSSC1	MYT1L - LINC01250	ENSG00000186487	ENSG00000234423		397441	164464	rs896232-?	rs896232	0	896232	intergenic_variant	1	NR	1e-06	6	(SI+M)	0.2	[0.082-0.318] unit decrease	Illumina [693128]	N	insulin sensitivity measurement, glucose homeostasis trait	http://www.ebi.ac.uk/efo/EFO_0004471, http://purl.obolibrary.org/obo/OBA_1000528	GCST002726	Genome-wide genotyping array
	2015-04-16	25082827	Julia A	2014-07-31	Hum Mol Genet	www.ncbi.nlm.nih.gov/pubmed/25082827	A genome-wide association study identifies a novel locus at 6q22.1 associated with ulcerative colitis.	Ulcerative colitis	up to 7,483 European ancestry cases, up to 21,211 European ancestry controls	1,073 European ancestry cases, 1,279 European ancestry controls	2p25.3	2	2402716	MYTL	MYT1L - LINC01250	ENSG00000186487	ENSG00000234423		71052	490853	rs11679592-C	rs11679592	0	11679592	intergenic_variant	1	0.48	9e-06	5.04576	(Southern European)	1.16	[1.03-1.31]	Illumina [546271]	N	ulcerative colitis	http://www.ebi.ac.uk/efo/EFO_0000729	GCST002548	Genome-wide genotyping array
	2015-04-01	25147783	Keene KL	2014-08-06	Front Public Health	www.ncbi.nlm.nih.gov/pubmed/25147783	Genetic Associations with Plasma B12, B6, and Folate Levels in an Ischemic Stroke Population from the Vitamin Intervention for Stroke Prevention (VISP) Trial.	Vitamin B levels in ischemic stroke	1,725 European ancestry cases, 258 African ancestry cases, 117 cases	NA	2p25.3	2	2479854	MYT1L	MYT1L - LINC01250	ENSG00000186487	ENSG00000234423		148190	413715	rs12611820-C	rs12611820	0	12611820	intergenic_variant	1	0.245	1e-06	6	(Vitamin B9 - Folate)	0.169	[NR] unit decrease	Illumina [737081]	N	folic acid measurement	http://www.ebi.ac.uk/efo/EFO_0005111	GCST002559	Genome-wide genotyping array
	2014-10-28	24665060	Argos M	2014-03-24	J Med Genet	www.ncbi.nlm.nih.gov/pubmed/24665060	Genome-wide association study of smoking behaviours among Bangladeshi adults.	Smoking initiation	754 Bangladeshi ancestry never smoker males, 2,565 Bangladeshi ancestry never smoker females, 1,837 Bangladeshi ancestry ever smoker males, 198 Bangladeshi ancestry ever smoker females	NA	2p25.3	2	2839536	NR	MYT1L - LINC01250	ENSG00000186487	ENSG00000234423		507872	54033	rs13403149-?	rs13403149	0	13403149	intergenic_variant	1	NR	7e-06	5.1549	(males)			Illumina [1211988] (imputed)	N	smoking initiation	http://www.ebi.ac.uk/efo/EFO_0005670	GCST002396	Genome-wide genotyping array
	2017-09-05	28644415	Guenard F	2017-06-23	Nutrients	www.ncbi.nlm.nih.gov/pubmed/28644415	Genome-Wide Association Study of Dietary Pattern Scores.	Prudent dietary pattern	141 individuals	NA	2p25.3	2	2766148	LINC01250	MYT1L - LINC01250	ENSG00000186487	ENSG00000234423		434484	127421	rs62105778-?	rs62105778	0	62105778	intergenic_variant	1	NR	3e-06	5.52288				Illumina [2668805]	N	diet measurement	http://www.ebi.ac.uk/efo/EFO_0008111	GCST004639	Genome-wide genotyping array
	2021-09-09	33888907	Shelton JF	2021-04-22	Nat Genet	www.ncbi.nlm.nih.gov/pubmed/33888907	Trans-ancestry analysis reveals genetic and nongenetic associations with COVID-19 susceptibility and severity.	COVID-19 (covid respiratory support vs population)	495 European ancestry cases, 680,440 European ancestry controls, 102 Hispanic or Latin American cases, 94,330 Hispanic or Latin American controls, 39 Black or African American cases, 22,410 Black or African American controls	NA	2p25.3	2	2815772		MYT1L - LINC01250	ENSG00000186487	ENSG00000234423		484108	77797	rs11127334-?	rs11127334	0	11127334	intergenic_variant	1	NR	4e-06	5.39794		0.529652	[0.31-0.75] unit increase	Illumina [9842460] (imputed)	N	COVID-19	http://purl.obolibrary.org/obo/MONDO_0100096	GCST90027248	Genome-wide genotyping array
	2021-11-23	34241534	Lu Y	2021-07-09	Circ Genom Precis Med	www.ncbi.nlm.nih.gov/pubmed/34241534	Multiethnic Genome-wide Association Study of Subclinical Atherosclerosis in Individuals with Type 2 Diabetes.	Coronary artery calcification in type 2 diabetes (excluding prevalent cardiovascular disease)	1,248 African American individuals	NA	2p25.3	2	2601621		MYT1L - LINC01250	ENSG00000186487	ENSG00000234423		269957	291948	rs73908993-C	rs73908993	0	73908993	intergenic_variant	1	0.92	5e-07	6.30103		0.91	[0.56-1.26] unit increase	Affymetrix, Illumina [19600000] (imputed)	N	coronary artery calcification	http://www.ebi.ac.uk/efo/EFO_0004723	GCST90026643	Genome-wide genotyping array
	2024-02-23	37164013	Andreu-Sanchez S	2023-04-25	Immunity	www.ncbi.nlm.nih.gov/pubmed/37164013	Phage display sequencing reveals that genetic, environmental, and intrinsic factors influence variation of human antibody epitope repertoire.	Seropositivity for streptococcus pyogenes peptide (twist_16275)	1,745 individuals	NA	2p25.3	2	2880728		MYT1L - LINC01250	ENSG00000186487	ENSG00000234423		549064	12841	rs6741639-?	rs6741639	0	6741639	intergenic_variant	1	NR	1e-08	8	(additive)	5.672	z score increase	NR [4546708] (imputed)	N	streptococcus seropositivity	http://www.ebi.ac.uk/efo/EFO_0803651	GCST90295731	Genome-wide genotyping array
	2024-01-18	37337107	Kiryluk K	2023-06-19	Nat Genet	www.ncbi.nlm.nih.gov/pubmed/37337107	Genome-wide association analyses define pathogenic signaling pathways and prioritize drug targets for IgA nephropathy.	IgA nephropathy	5,556 European ancestry cases, 21,178 European ancestry controls	NA	2p25.3	2	2512321		MYT1L - LINC01250	ENSG00000186487	ENSG00000234423		180657	381248	rs79067042-G	rs79067042	0	79067042	intergenic_variant	1	0.176	6e-06	5.22185		1.21		Illumina [NR] (imputed)	N	IGA glomerulonephritis	http://www.ebi.ac.uk/efo/EFO_0004194	GCST90308723	Genome-wide genotyping array, Targeted genotyping array
	2021-09-24	33349686	Wendt FR	2020-12-21	Nat Hum Behav	www.ncbi.nlm.nih.gov/pubmed/33349686	Multivariate genome-wide analysis of education, socioeconomic status and brain phenome.	Neuroticism conditioned on Townsend deprivation index (multi-trait conditioning and joint analysis)	170,911 European ancestry individuals	NA	2p25.3	2	2771967		MYT1L - LINC01250	ENSG00000186487	ENSG00000234423		440303	121602	rs67723639-?	rs67723639	0	67723639	intergenic_variant	1	NR	5e-08	7.30103				NR [NR]	N	neuroticism measurement	http://www.ebi.ac.uk/efo/EFO_0007660	GCST90027240	Genome-wide genotyping array
	2021-09-24	33349686	Wendt FR	2020-12-21	Nat Hum Behav	www.ncbi.nlm.nih.gov/pubmed/33349686	Multivariate genome-wide analysis of education, socioeconomic status and brain phenome.	Neuroticism conditioned on educational attainment (multi-trait conditioning and joint analysis)	170,911 European ancestry individuals	NA	2p25.3	2	2771967		MYT1L - LINC01250	ENSG00000186487	ENSG00000234423		440303	121602	rs67723639-?	rs67723639	0	67723639	intergenic_variant	1	NR	3e-08	7.52288				NR [NR]	N	neuroticism measurement	http://www.ebi.ac.uk/efo/EFO_0007660	GCST90027241	Genome-wide genotyping array
	2021-09-24	33349686	Wendt FR	2020-12-21	Nat Hum Behav	www.ncbi.nlm.nih.gov/pubmed/33349686	Multivariate genome-wide analysis of education, socioeconomic status and brain phenome.	Neuroticism conditioned on self-rated math ability (multi-trait conditioning and joint analysis)	170,911 European ancestry individuals	NA	2p25.3	2	2771967		MYT1L - LINC01250	ENSG00000186487	ENSG00000234423		440303	121602	rs67723639-?	rs67723639	0	67723639	intergenic_variant	1	NR	4e-08	7.39794				NR [NR]	N	neuroticism measurement	http://www.ebi.ac.uk/efo/EFO_0007660	GCST90027244	Genome-wide genotyping array
	2021-09-24	33349686	Wendt FR	2020-12-21	Nat Hum Behav	www.ncbi.nlm.nih.gov/pubmed/33349686	Multivariate genome-wide analysis of education, socioeconomic status and brain phenome.	Neuroticism conditioned on highest math class (multi-trait conditioning and joint analysis)	170,911 European ancestry individuals	NA	2p25.3	2	2771967		MYT1L - LINC01250	ENSG00000186487	ENSG00000234423		440303	121602	rs67723639-?	rs67723639	0	67723639	intergenic_variant	1	NR	3e-08	7.52288				NR [NR]	N	neuroticism measurement	http://www.ebi.ac.uk/efo/EFO_0007660	GCST90027242	Genome-wide genotyping array
	2022-03-04	34353775	Galesloot TE	2021-08-02	Eur Urol Oncol	www.ncbi.nlm.nih.gov/pubmed/34353775	Genome-wide Meta-analysis Identifies Novel Genes Associated with Recurrence and Progression in Non-muscle-invasive Bladder Cancer.	Recurrence-free survival in non-muscle-invasive bladder cancer	3,400 European ancestry individuals	NA	2p25.3	2	2811839		MYT1L - LINC01250	ENSG00000186487	ENSG00000234423		480175	81730	rs4420730-T	rs4420730	0	4420730	intergenic_variant	1	NR	4e-06	5.39794		1.71	[1.36-2.14]	Illumina [7591411] (imputed)	N	event free survival time, urinary bladder cancer	http://www.ebi.ac.uk/efo/EFO_0000482, http://purl.obolibrary.org/obo/MONDO_0001187	GCST90095079	Genome-wide genotyping array
	2018-11-05	30247649	Gonzalez-Serna D	2018-09-21	Rheumatology (Oxford)	www.ncbi.nlm.nih.gov/pubmed/30247649	Analysis of the genetic component of systemic sclerosis in Iranian and Turkish populations through a genome-wide association study.	Systemic sclerosis	764 Middle Eastern ancestry cases, 1,343 Middle Eastern ancestry controls	NA	2p25.3	2	1781887	PXDN, MYT1L	PXDN - MYT1L	ENSG00000130508	ENSG00000186487		37035	7226	rs2059413-?	rs2059413	0	2059413	intergenic_variant	1	NR	6e-06	5.22185		1.40845	[1.22-1.64]	Illumina [5698748] (imputed)	N	systemic scleroderma	http://www.ebi.ac.uk/efo/EFO_0000717	GCST006493	Genome-wide genotyping array
	2017-07-11	28441456	Lee MK	2017-04-25	PLoS One	www.ncbi.nlm.nih.gov/pubmed/28441456	Genome-wide association study of facial morphology reveals novel associations with FREM1 and PARK2.	Facial morphology (factor 14, intercanthal width)	2,187 European ancestry individuals	NA	2p25.3	2	2517476	NR	MYT1L - LINC01250	ENSG00000186487	ENSG00000234423		185812	376093	rs1706867-G	rs1706867	0	1706867	intergenic_variant	1	0.4629	4e-06	5.39794		0.138	[0.079-0.197] unit increase	Illumina [10677593] (imputed)	N	eye morphology trait	http://purl.obolibrary.org/obo/OBA_VT0002092	GCST004318	Genome-wide genotyping array
	2017-12-20	29109912	Rawofi L	2017-11-02	PeerJ	www.ncbi.nlm.nih.gov/pubmed/29109912	Genome-wide association study of pigmentary traits (skin and iris color) in individuals of East Asian ancestry.	Iris heterochromicity	377 East Asian ancestry individuals	NA	2p25.3	2	2788303	intergenic	MYT1L - LINC01250	ENSG00000186487	ENSG00000234423		456639	105266	rs72776813-A	rs72776813	0	72776813	intergenic_variant	1	0.210892	4e-07	6.39794		0.481	[0.3-0.66] unit decrease	Illumina [at least 520076] (imputed)	N	eye color	http://www.ebi.ac.uk/efo/EFO_0003949	GCST005095	Genome-wide genotyping array
	2022-09-30	34391895	Kanai M	2021-08-12	Ann Oncol	www.ncbi.nlm.nih.gov/pubmed/34391895	Large-Scale Prospective Genome-Wide Association Study of Oxaliplatin in Stage II/III Colon Cancer and Neuropathy.	Oxaliplatin-induced allergic reactions in colon cancer (extreme)	57 Japanese ancestry cases, 430 Japanese ancestry controls	NA	2p25.3	2	2789275		MYT1L - LINC01250	ENSG00000186487	ENSG00000234423		457611	104294	rs79701786-A	rs79701786	0	79701786	intergenic_variant	1	NR	6e-06	5.22185		4.91	[2.47-9.77]	Illumina [6412903] (imputed)	N	drug allergy, trait in response to platinum	http://www.ebi.ac.uk/efo/EFO_0009482, http://purl.obolibrary.org/obo/OBA_2040037	GCST90060089	Genome-wide genotyping array
	2022-12-21	36477530	Saunders GRB	2022-12-07	Nature	www.ncbi.nlm.nih.gov/pubmed/36477530	Genetic diversity fuels gene discovery for tobacco and alcohol use.	Smoking initiation	2,669,029 European ancestry individuals	NA	2p25.3	2	2851058		MYT1L - LINC01250	ENSG00000186487	ENSG00000234423		519394	42511	rs823174-G	rs823174	0	823174	intergenic_variant	1	0.393	2e-09	8.69897		0.00534	[0.0036-0.0071] unit decrease	NR [NR] (imputed)	N	smoking initiation	http://www.ebi.ac.uk/efo/EFO_0005670	GCST90243968	Genome-wide genotyping array, Genome-wide sequencing
	2023-04-14	36395887	Moore A	2022-11-14	J Biol Chem	www.ncbi.nlm.nih.gov/pubmed/36395887	Genome-wide metabolite quantitative trait loci analysis (mQTL) in red blood cells from volunteer blood donors.	RBC levels of [Similar to: gamma-Glutamylcysteine; deltaMass: -146.3080 Da]	243 individuals	NA	2p25.3	2	2699913		MYT1L - LINC01250	ENSG00000186487	ENSG00000234423		368249	193656	rs76223786-G	rs76223786	0	76223786	intergenic_variant	1	0.97	2e-08	7.69897		2.03	[1.32-2.74] unit increase	NR [811782] (imputed)	N	metabolite measurement	http://www.ebi.ac.uk/efo/EFO_0004725	GCST90267425	Genome-wide genotyping array
	2019-06-25	30804565	Jansen PR	2019-02-25	Nat Genet	www.ncbi.nlm.nih.gov/pubmed/30804565	Genome-wide analysis of insomnia in 1,331,010 individuals identifies new risk loci and functional pathways.	Insomnia	651,923 European ancestry males, 679,087 European ancestry females	NA	2p25.3	2	2846768	NR	MYT1L - LINC01250	ENSG00000186487	ENSG00000234423		515104	46801	rs823247-C	rs823247	0	823247	regulatory_region_variant	1	0.521	5e-10	9.30103		1.03734	[1.03-1.05]	Affymetrix, Illumina [NR] (imputed)	N	insomnia measurement	http://www.ebi.ac.uk/efo/EFO_0007876	GCST007988	Genome-wide genotyping array
	2022-07-01	35361970	Okbay A	2022-03-31	Nat Genet	www.ncbi.nlm.nih.gov/pubmed/35361970	Polygenic prediction of educational attainment within and between families from genome-wide association analyses in 3 million individuals.	Educational attainment	3,037,499 European ancestry individuals	NA	2p25.3	2	1785075		PXDN - MYT1L	ENSG00000130508	ENSG00000186487		40223	4038	rs10519486-A	rs10519486	0	10519486	intergenic_variant	1	0.2294	2e-10	9.69897	(conditional)	0.00810028	[0.0056-0.0106] unit increase	Illumina [10675380] (imputed)	N	educational attainment	http://www.ebi.ac.uk/efo/EFO_0011015	GCST90105038	Genome-wide genotyping array
	2022-09-01	31882771	Al-Khelaifi F	2019-12-27	Sci Rep	www.ncbi.nlm.nih.gov/pubmed/31882771	Metabolic GWAS of elite athletes reveals novel genetically-influenced metabolites associated with athletic performance.	Octanoylcarnitine (C8) levels in elite athletes	490 individuals	NA	2p25.3	2	2433302		MYT1L - LINC01250	ENSG00000186487	ENSG00000234423		101638	460267	rs7577250-?	rs7577250	0	7577250	intergenic_variant	1	NR	6e-07	6.22185		0.345644	[0.21-0.48] unit decrease	Illumina [275016]	N	lipid measurement	http://www.ebi.ac.uk/efo/EFO_0004529	GCST90134025	Genome-wide genotyping array
	2022-09-01	31882771	Al-Khelaifi F	2019-12-27	Sci Rep	www.ncbi.nlm.nih.gov/pubmed/31882771	Metabolic GWAS of elite athletes reveals novel genetically-influenced metabolites associated with athletic performance.	Decanoylcarnitine (C10) levels in elite athletes	490 individuals	NA	2p25.3	2	2433302		MYT1L - LINC01250	ENSG00000186487	ENSG00000234423		101638	460267	rs7577250-?	rs7577250	0	7577250	intergenic_variant	1	NR	2e-06	5.69897		0.33152	[0.2-0.47] unit decrease	Illumina [275016]	N	lipid measurement	http://www.ebi.ac.uk/efo/EFO_0004529	GCST90133912	Genome-wide genotyping array
	2023-12-12	37359372	Nardone GG	2023-06-09	Front Genet	www.ncbi.nlm.nih.gov/pubmed/37359372	Identifying missing pieces in color vision defects: a genome-wide association study in Silk Road populations.	Color vision defects (Tritan)	12 Silk Road (founder/genetic isolate) cases, 508 Silk Road (founder/genetic isolate) controls	NA	2p25.3	2	2742635		MYT1L - LINC01250	ENSG00000186487	ENSG00000234423		410971	150934	rs116118491-A	rs116118491	0	116118491	intergenic_variant	1	0.978	4e-06	5.39794		0.172992	[0.1-0.25] unit decrease	Illumina [7783479] (imputed)	N	color vision disorder	http://purl.obolibrary.org/obo/MONDO_0001703	GCST90301671	Genome-wide genotyping array
	2023-02-09	36224396	Yengo L	2022-10-12	Nature	www.ncbi.nlm.nih.gov/pubmed/36224396	A saturated map of common genetic variants associated with human height.	Height	5,314,291 European ancestry, Hispanic or Latin American, East Asian ancestry, African ancestry, South Asian ancestry individuals	NA	2p25.3	2	1744930		PXDN - MYT1L	ENSG00000130508	ENSG00000186487		78	44183	rs736870-C	rs736870	0	736870	regulatory_region_variant	1	0.3096	1e-91	91		0.0139	[0.013-0.015] unit increase	Affymetrix, Illumina [1385132] (imputed)	N	body height	http://purl.obolibrary.org/obo/OBA_VT0001253	GCST90245848	Genome-wide genotyping array
	2023-02-09	36224396	Yengo L	2022-10-12	Nature	www.ncbi.nlm.nih.gov/pubmed/36224396	A saturated map of common genetic variants associated with human height.	Height	5,314,291 European ancestry, Hispanic or Latin American, East Asian ancestry, African ancestry, South Asian ancestry individuals	NA	2p25.3	2	2342020		MYT1L - LINC01250	ENSG00000186487	ENSG00000234423		10356	551549	rs7559111-C	rs7559111	0	7559111	intergenic_variant	1	0.2202	1e-26	26		0.008	[0.0066-0.0094] unit decrease	Affymetrix, Illumina [1385132] (imputed)	N	body height	http://purl.obolibrary.org/obo/OBA_VT0001253	GCST90245848	Genome-wide genotyping array
	2024-09-12	37984853	Eissman JM	2023-11-20	Alzheimers Dement	www.ncbi.nlm.nih.gov/pubmed/37984853	Sex-specific genetic architecture of late-life memory performance.	Memory decline in normal cognition	391 African ancestry males	NA	2p25.3	2	2696587		MYT1L - LINC01250	ENSG00000186487	ENSG00000234423		364923	196982	rs34466054-?	rs34466054	0	34466054	intergenic_variant	1	NR	6e-06	5.22185		0.028203	unit decrease	Affymetrix, Illumina [NR] (imputed)	N	memory performance	http://www.ebi.ac.uk/efo/EFO_0004874	GCST90448450	Genome-wide genotyping array
	2024-09-12	37984853	Eissman JM	2023-11-20	Alzheimers Dement	www.ncbi.nlm.nih.gov/pubmed/37984853	Sex-specific genetic architecture of late-life memory performance.	Memory decline in normal cognition	391 African ancestry males	NA	2p25.3	2	2696710		MYT1L - LINC01250	ENSG00000186487	ENSG00000234423		365046	196859	rs67404463-?	rs67404463	0	67404463	intergenic_variant	1	NR	6e-06	5.22185		0.028022	unit decrease	Affymetrix, Illumina [NR] (imputed)	N	memory performance	http://www.ebi.ac.uk/efo/EFO_0004874	GCST90448450	Genome-wide genotyping array
	2024-09-12	37984853	Eissman JM	2023-11-20	Alzheimers Dement	www.ncbi.nlm.nih.gov/pubmed/37984853	Sex-specific genetic architecture of late-life memory performance.	Memory decline in normal cognition	391 African ancestry males	NA	2p25.3	2	2689530		MYT1L - LINC01250	ENSG00000186487	ENSG00000234423		357866	204039	rs56404010-?	rs56404010	0	56404010	intergenic_variant	1	NR	9e-06	5.04576		0.024563	unit decrease	Affymetrix, Illumina [NR] (imputed)	N	memory performance	http://www.ebi.ac.uk/efo/EFO_0004874	GCST90448450	Genome-wide genotyping array
	2024-09-12	37984853	Eissman JM	2023-11-20	Alzheimers Dement	www.ncbi.nlm.nih.gov/pubmed/37984853	Sex-specific genetic architecture of late-life memory performance.	Memory decline in normal cognition	391 African ancestry males	NA	2p25.3	2	2692277		MYT1L - LINC01250	ENSG00000186487	ENSG00000234423		360613	201292	rs66612971-?	rs66612971	0	66612971	intergenic_variant	1	NR	9e-06	5.04576		0.024563	unit decrease	Affymetrix, Illumina [NR] (imputed)	N	memory performance	http://www.ebi.ac.uk/efo/EFO_0004874	GCST90448450	Genome-wide genotyping array
	2024-09-12	37984853	Eissman JM	2023-11-20	Alzheimers Dement	www.ncbi.nlm.nih.gov/pubmed/37984853	Sex-specific genetic architecture of late-life memory performance.	Memory decline in normal cognition x sex interaction	1,775 African ancestry individuals	NA	2p25.3	2	2685420		MYT1L - LINC01250	ENSG00000186487	ENSG00000234423		353756	208149	rs6737079-?	rs6737079	0	6737079	intergenic_variant	1	NR	9e-06	5.04576		0.021615	unit increase	Affymetrix, Illumina [NR] (imputed)	N	memory performance, sex interaction measurement	http://www.ebi.ac.uk/efo/EFO_0004874, http://www.ebi.ac.uk/efo/EFO_0008343	GCST90448468	Genome-wide genotyping array
	2024-09-12	37984853	Eissman JM	2023-11-20	Alzheimers Dement	www.ncbi.nlm.nih.gov/pubmed/37984853	Sex-specific genetic architecture of late-life memory performance.	Memory decline in normal cognition x sex interaction	1,775 African ancestry individuals	NA	2p25.3	2	2689530		MYT1L - LINC01250	ENSG00000186487	ENSG00000234423		357866	204039	rs56404010-?	rs56404010	0	56404010	intergenic_variant	1	NR	5e-06	5.30103		0.029479	unit increase	Affymetrix, Illumina [NR] (imputed)	N	memory performance, sex interaction measurement	http://www.ebi.ac.uk/efo/EFO_0004874, http://www.ebi.ac.uk/efo/EFO_0008343	GCST90448468	Genome-wide genotyping array
	2024-09-12	37984853	Eissman JM	2023-11-20	Alzheimers Dement	www.ncbi.nlm.nih.gov/pubmed/37984853	Sex-specific genetic architecture of late-life memory performance.	Memory decline in normal cognition x sex interaction	1,775 African ancestry individuals	NA	2p25.3	2	2696587		MYT1L - LINC01250	ENSG00000186487	ENSG00000234423		364923	196982	rs34466054-?	rs34466054	0	34466054	intergenic_variant	1	NR	6e-06	5.22185		0.032151	unit increase	Affymetrix, Illumina [NR] (imputed)	N	memory performance, sex interaction measurement	http://www.ebi.ac.uk/efo/EFO_0004874, http://www.ebi.ac.uk/efo/EFO_0008343	GCST90448468	Genome-wide genotyping array
	2024-09-12	37984853	Eissman JM	2023-11-20	Alzheimers Dement	www.ncbi.nlm.nih.gov/pubmed/37984853	Sex-specific genetic architecture of late-life memory performance.	Memory decline in normal cognition x sex interaction	1,775 African ancestry individuals	NA	2p25.3	2	2692277		MYT1L - LINC01250	ENSG00000186487	ENSG00000234423		360613	201292	rs66612971-?	rs66612971	0	66612971	intergenic_variant	1	NR	7e-06	5.1549		0.029047	unit increase	Affymetrix, Illumina [NR] (imputed)	N	memory performance, sex interaction measurement	http://www.ebi.ac.uk/efo/EFO_0004874, http://www.ebi.ac.uk/efo/EFO_0008343	GCST90448468	Genome-wide genotyping array
	2024-09-12	37984853	Eissman JM	2023-11-20	Alzheimers Dement	www.ncbi.nlm.nih.gov/pubmed/37984853	Sex-specific genetic architecture of late-life memory performance.	Memory decline in normal cognition x sex interaction	1,775 African ancestry individuals	NA	2p25.3	2	2696710		MYT1L - LINC01250	ENSG00000186487	ENSG00000234423		365046	196859	rs67404463-?	rs67404463	0	67404463	intergenic_variant	1	NR	7e-06	5.1549		0.031819	unit increase	Affymetrix, Illumina [NR] (imputed)	N	memory performance, sex interaction measurement	http://www.ebi.ac.uk/efo/EFO_0004874, http://www.ebi.ac.uk/efo/EFO_0008343	GCST90448468	Genome-wide genotyping array
Yes	2025-01-30	39794498	Konieczny MJ	2025-01-10	Commun Biol	www.ncbi.nlm.nih.gov/pubmed/39794498	The genomic architecture of circulating cytokine levels points to drug targets for immune-related diseases.	Interleukin-1 beta levels	38,868 European ancestry individuals	NA	2p25.3	2	2739335		MYT1L - LINC01250	ENSG00000186487	ENSG00000234423		407671	154234	rs79668485-?	rs79668485	0	79668485	intergenic_variant	1	0.0062	2e-08	7.69897		0.257288	[0.17-0.35] unit increase	Affymetrix, Illumina [7810021] (imputed)	N	interleukin-1 beta measurement	http://www.ebi.ac.uk/efo/EFO_0004812	GCST90428412	Genome-wide genotyping array
	2024-03-28	37500982	He D	2023-07-27	Osteoporos Int	www.ncbi.nlm.nih.gov/pubmed/37500982	A longitudinal genome-wide association study of bone mineral density mean and variability in the UK Biobank.	Bone mineral density mean	5,862 South Asian ancestry individuals	NA	2p25.3	2	2752250		MYT1L - LINC01250	ENSG00000186487	ENSG00000234423		420586	141319	rs142272354-?	rs142272354	0	142272354	intergenic_variant	1	NR	1e-93	93				NR [NR] (imputed)	N	bone density	http://purl.obolibrary.org/obo/OBA_1000110	GCST90321120	Genome-wide genotyping array
	2024-05-24	38652878	Im C	2024-04-23	J Clin Oncol	www.ncbi.nlm.nih.gov/pubmed/38652878	Trans-Ancestral Genetic Risk Factors for Treatment-Related Type 2 Diabetes Mellitus in Survivors of Childhood Cancer.	Type 2 diabetes in childhood cancer survivors	261 European ancestry cases, 2,841 European ancestry controls, 43 African American or Afro-Caribbean cases, 531 African American or Afro-Caribbean controls	NA	2p25.3	2	2434310		MYT1L - LINC01250	ENSG00000186487	ENSG00000234423		102646	459259	rs143578296-A	rs143578296	0	143578296	intergenic_variant	1	0.1	5e-08	7.30103				NR [8986646]	N	type 2 diabetes mellitus	http://purl.obolibrary.org/obo/MONDO_0005148	GCST90428871	Genome-wide sequencing
	2022-08-05	35835914	Watanabe K	2022-07-14	Nat Genet	www.ncbi.nlm.nih.gov/pubmed/35835914	Genome-wide meta-analysis of insomnia prioritizes genes associated with metabolic and psychiatric pathways.	Insomnia	593,724 European ancestry cases, 1,771,286 European ancestry controls	NA	2p25.3	2	2846862		MYT1L - LINC01250	ENSG00000186487	ENSG00000234423		515198	46707	rs823248-T	rs823248	0	823248	regulatory_region_variant	1	NR	5e-10	9.30103		0.006	[0.004-0.008] unit decrease	Illumina [10713943] (imputed)	N	insomnia	http://www.ebi.ac.uk/efo/EFO_0004698	GCST90131901	Genome-wide genotyping array
	2022-12-14	36477530	Saunders GRB	2022-12-07	Nature	www.ncbi.nlm.nih.gov/pubmed/36477530	Genetic diversity fuels gene discovery for tobacco and alcohol use.	Smoking initiation	3,382,012 European ancestry, East Asian ancestry, Hispanic or Latin American, African ancestry individuals	NA	2p25.3	2	2523343		MYT1L - LINC01250	ENSG00000186487	ENSG00000234423		191679	370226	rs6727479-G	rs6727479	0	6727479	intergenic_variant	1	0.0791	4e-11	10.3979		0.00985	[0.0069-0.0128] unit increase	NR [NR] (imputed)	N	smoking initiation	http://www.ebi.ac.uk/efo/EFO_0005670	GCST90243985	Genome-wide genotyping array, Genome-wide sequencing
	2022-12-14	36477530	Saunders GRB	2022-12-07	Nature	www.ncbi.nlm.nih.gov/pubmed/36477530	Genetic diversity fuels gene discovery for tobacco and alcohol use.	Smoking initiation	3,382,012 European ancestry, East Asian ancestry, Hispanic or Latin American, African ancestry individuals	NA	2p25.3	2	2880728		MYT1L - LINC01250	ENSG00000186487	ENSG00000234423		549064	12841	rs6741639-C	rs6741639	0	6741639	intergenic_variant	1	0.422	2e-11	10.699		0.00524	[0.0037-0.0068] unit decrease	NR [NR] (imputed)	N	smoking initiation	http://www.ebi.ac.uk/efo/EFO_0005670	GCST90243985	Genome-wide genotyping array, Genome-wide sequencing
	2023-01-11	36228427	Yuan J	2022-10-08	Asian J Psychiatr	www.ncbi.nlm.nih.gov/pubmed/36228427	Discovery of a genome-wide significant locus associated with antidepressant response in Han Chinese population.	Response to antidepressants (symptom improvement) in major depressive disorder	724 Han Chinese ancestry individuals	NA	2p25.3	2	2729334		MYT1L - LINC01250	ENSG00000186487	ENSG00000234423		397670	164235	rs745581-C	rs745581	0	745581	intergenic_variant	1	NR	4e-06	5.39794		0.057	unit decrease	Illumina [8307703] (imputed)	N	depressive symptom measurement, response to antidepressant	http://www.ebi.ac.uk/efo/EFO_0007006, http://purl.obolibrary.org/obo/GO_0036276	GCST90244558	Genome-wide genotyping array
	2023-01-11	36228427	Yuan J	2022-10-08	Asian J Psychiatr	www.ncbi.nlm.nih.gov/pubmed/36228427	Discovery of a genome-wide significant locus associated with antidepressant response in Han Chinese population.	Response to antidepressants in major depressive disorder	465 Han Chinese ancestry cases, 259 Han Chinese ancestry controls	NA	2p25.3	2	2729334		MYT1L - LINC01250	ENSG00000186487	ENSG00000234423		397670	164235	rs745581-C	rs745581	0	745581	intergenic_variant	1	NR	2e-06	5.69897		0.572	unit increase	Illumina [8307703] (imputed)	N	response to antidepressant	http://purl.obolibrary.org/obo/GO_0036276	GCST90244559	Genome-wide genotyping array
	2025-02-14	38326779	Boahen CK	2024-02-08	BMC Genomics	www.ncbi.nlm.nih.gov/pubmed/38326779	Sex-biased genetic regulation of inflammatory proteins in the Dutch population.	TRANCE levels	359 European ancestry females	NA	2p25.3	2	2764926		MYT1L - LINC01250	ENSG00000186487	ENSG00000234423		433262	128643	rs7565315-?	rs7565315	0	7565315	intergenic_variant	1	NR	6e-06	5.22185		4.524	z score increase	Illumina [4296841] (imputed)	N	TNF-related activation-induced cytokine measurement	http://www.ebi.ac.uk/efo/EFO_0010929	GCST90503465	Genome-wide genotyping array
	2025-01-06	39024449	Verma A	2024-07-19	Science	www.ncbi.nlm.nih.gov/pubmed/39024449	Diversity and scale: Genetic architecture of 2068 traits in the VA Million Veteran Program.	Acute prostatitis (PheCode 601.11)	683 African American or Afro-Caribbean cases, 102,430 African American or Afro-Caribbean controls, 1,997 European ancestry cases, 410,015 European ancestry controls, 285 Hispanic or Latin American cases, 52,788 Hispanic or Latin American controls	NA	2p25.3	2	1747872		PXDN - MYT1L	ENSG00000130508	ENSG00000186487		3020	41241	rs568184630-C	rs568184630	0	568184630	intergenic_variant	1	0.9995	4e-12	11.3979		2.68	[2.64-2.72] unit decrease	NR [44300000] (imputed)	N	prostatitis	http://www.ebi.ac.uk/efo/EFO_0003830	GCST90480407	Genome-wide genotyping array
	2020-07-28	32450446	Wang H	2020-04-29	Neurobiol Aging	www.ncbi.nlm.nih.gov/pubmed/32450446	Genome-wide interaction analysis of pathological hallmarks in Alzheimer's disease.	Total PHF-tau (SNP x SNP interaction)	1,285 individuals	NA	10q23.1 x 2p25.3	10 x 2	85994586 x 2771923	NR x NR	GRID1 x MYT1L - LINC01250						rs12773130-? x rs11686290-?	rs12773130 x rs11686290	0		intron_variant x intergenic_variant		NR	2e-08	7.69897				Affymetrix, Illumina [279409] (imputed)	N	PHF-tau measurement	http://www.ebi.ac.uk/efo/EFO_0010750	GCST010340	Genome-wide genotyping array
	2020-07-28	32450446	Wang H	2020-04-29	Neurobiol Aging	www.ncbi.nlm.nih.gov/pubmed/32450446	Genome-wide interaction analysis of pathological hallmarks in Alzheimer's disease.	Total PHF-tau (SNP x SNP interaction)	1,285 individuals	NA	2p25.3 x 1q41	2 x 1	2124813 x 218548839	NR x NR	MYT1L x U3 - NXNP1						rs1620250-? x rs1764697-?	rs1620250 x rs1764697	0		intron_variant x intergenic_variant		NR	2e-08	7.69897				Affymetrix, Illumina [279409] (imputed)	N	PHF-tau measurement	http://www.ebi.ac.uk/efo/EFO_0010750	GCST010340	Genome-wide genotyping array
	2020-07-28	32450446	Wang H	2020-04-29	Neurobiol Aging	www.ncbi.nlm.nih.gov/pubmed/32450446	Genome-wide interaction analysis of pathological hallmarks in Alzheimer's disease.	Diffuse plaques (SNP x SNP interaction)	1,316 individuals	NA	2p25.3 x 5q13.3	2 x 5	2709171 x 75044502	NR x NR	MYT1L - LINC01250 x GCNT4						rs7589592-? x rs7714420-?	rs7589592 x rs7714420	0		intergenic_variant x intron_variant		NR	1e-07	7				Affymetrix, Illumina [279409] (imputed)	N	diffuse plaque measurement	http://www.ebi.ac.uk/efo/EFO_0010699	GCST010341	Genome-wide genotyping array
	2020-07-28	32450446	Wang H	2020-04-29	Neurobiol Aging	www.ncbi.nlm.nih.gov/pubmed/32450446	Genome-wide interaction analysis of pathological hallmarks in Alzheimer's disease.	Diffuse plaques (SNP x SNP interaction)	1,316 individuals	NA	2p25.3 x 3p24.3	2 x 3	2211431 x 21258017	NR x NR	MYT1L x SGO1-AS1 - VENTXP7						rs13012468-? x rs4858304-?	rs13012468 x rs4858304	0		intron_variant x intergenic_variant		NR	1e-07	7				Affymetrix, Illumina [279409] (imputed)	N	diffuse plaque measurement	http://www.ebi.ac.uk/efo/EFO_0010699	GCST010341	Genome-wide genotyping array
	2016-01-27	25673413	Locke AE	2015-02-12	Nature	www.ncbi.nlm.nih.gov/pubmed/25673413	Genetic studies of body mass index yield new insights for obesity biology.	Body mass index	up to 104,666 European ancestry male individuals, up to 132,115 European ancestry female individuals, 370 African American male individuals, 517 African American female individuals, 512 Hispanic male individuals, 764 Hispanic female individuals	up to 48,274 European ancestry male individuals, up to 39,864 European ancestry female individuals, 2,441 African American or Afro-Caribbean male individuals, 6,314 African American or Afro-Caribbean female individuals, 919 Filipino male individuals, 828 Filipino female individuals, 205 Seychellois male individuals, 287 Seychellois female individuals, 2,964 South Asian ancestry male individuals, …	14q31.1	14	79433111	NRXN3	NRXN3			ENSG00000021645			rs7141420-T	rs7141420	0	7141420	intron_variant	0	0.528	6e-08	7.22185	(EA, men)	0.022	[0.014-0.03] kg/m2 increase	Affymetrix, Illumina [2550021]	N	body mass index	http://www.ebi.ac.uk/efo/EFO_0004340	GCST002783	Genome-wide genotyping array
	2017-12-05	29064472	Lencer R	2017-10-24	Transl Psychiatry	www.ncbi.nlm.nih.gov/pubmed/29064472	Genome-wide association studies of smooth pursuit and antisaccade eye movements in psychotic disorders: findings from the B-SNIP study.	Initial pursuit acceleration	114 African ancestry schizophrenia cases, 69 African schizo-affective cases, 41 African ancestry bipolar disorder cases, 76 African ancestry controls, 116 European ancestry schizophrenia cases, 86 European ancestry schizo-affective cases, 165 European ancestry bipolar disorder cases, 182 European ancestry controls	NA	14q31.1	14	78849039	IPO8	NRXN3			ENSG00000021645			rs142754384-C	rs142754384	1	75503662	intron_variant	0	0.004819	8e-11	10.0969				Illumina [4404269] (imputed)	N	initial pursuit acceleration	http://www.ebi.ac.uk/efo/EFO_0008434	GCST005023	Genome-wide genotyping array
	2017-12-05	29064472	Lencer R	2017-10-24	Transl Psychiatry	www.ncbi.nlm.nih.gov/pubmed/29064472	Genome-wide association studies of smooth pursuit and antisaccade eye movements in psychotic disorders: findings from the B-SNIP study.	Initial pursuit acceleration	114 African ancestry schizophrenia cases, 69 African schizo-affective cases, 41 African ancestry bipolar disorder cases, 76 African ancestry controls, 116 European ancestry schizophrenia cases, 86 European ancestry schizo-affective cases, 165 European ancestry bipolar disorder cases, 182 European ancestry controls	NA	14q31.1	14	78849039	IPO8	NRXN3			ENSG00000021645			rs142754384-C	rs142754384	1	75503662	intron_variant	0	0.0125	2e-10	9.69897	(African)			Illumina [4404269] (imputed)	N	initial pursuit acceleration	http://www.ebi.ac.uk/efo/EFO_0008434	GCST005023	Genome-wide genotyping array
	2017-11-30	29059683	Michailidou K	2017-10-23	Nature	www.ncbi.nlm.nih.gov/pubmed/29059683	Association analysis identifies 65 new breast cancer risk loci.	Breast cancer	76,192 European ancestry cases, 63,082 European ancestry controls	46,785 European ancestry cases, 42,892 European ancestry controls, 14,068 East Asian ancestry cases, 13,104 East Asian ancestry controls	14q24.3	14	78743396	NR	NRXN3			ENSG00000021645			rs112056657-G	rs112056657	0	112056657	intron_variant	0	0.0103	2e-06	5.69897	(EA)	0.1986	[0.12-0.28] unit decrease	Illumina [~ 11800000] (imputed)	N	breast carcinoma	http://www.ebi.ac.uk/efo/EFO_0000305	GCST004988	Genome-wide genotyping array
	2018-07-24	26426971	Winkler TW	2015-10-01	PLoS Genet	www.ncbi.nlm.nih.gov/pubmed/26426971	The Influence of Age and Sex on Genetic Associations with Adult Body Size and Shape: A Large-Scale Genome-Wide Interaction Study.	Body mass index	up to 309,889 European ancestry individuals	NA	14q31.1	14	79433111	NR	NRXN3			ENSG00000021645			rs7141420-T	rs7141420	0	7141420	intron_variant	0	0.523141	1e-24	24		0.0274895	unit increase	Affymetrix, Illumina, Perlegen [up to 2800000] (imputed)	N	body mass index	http://www.ebi.ac.uk/efo/EFO_0004340	GCST005951	Genome-wide genotyping array, Targeted genotyping array [Metabochip, CardioMetabochip]
	2017-12-01	28928442	Tian C	2017-09-19	Nat Commun	www.ncbi.nlm.nih.gov/pubmed/28928442	Genome-wide association and HLA region fine-mapping studies identify susceptibility loci for multiple common infections.	Mumps	31,227 European ancestry cases, 54,153 European ancestry controls	NA	14q24.3	14	78648839	NR	NRXN3			ENSG00000021645			rs72683573-?	rs72683573	0	72683573	intron_variant	0	NR	3e-06	5.52288		0.1131	[0.065-0.161] unit decrease	Illumina [at least 560000] (imputed)	N	susceptibility to mumps measurement	http://www.ebi.ac.uk/efo/EFO_0008404	GCST005003	Genome-wide genotyping array
	2017-05-11	28031287	Sasayama D	2016-11-26	Hum Mol Genet	www.ncbi.nlm.nih.gov/pubmed/28031287	Genome-wide quantitative trait loci mapping of the human cerebrospinal fluid proteome.	Cerebrospinal fluid biomarker levels	133 Japanese ancestry individuals.	NA	14q31.1	14	79860739	NR	NRXN3			ENSG00000021645			rs2293847-?	rs2293847	0	2293847	intron_variant	0	NR	4e-09	8.39794	(ATP synthase subunit beta, mitochondrial)			Illumina [514227]	N	cerebrospinal fluid composition attribute	http://purl.obolibrary.org/obo/OBA_2045291	GCST004000	Genome-wide genotyping array
	2019-11-04	30239722	Pulit SL	2018-09-14	Hum Mol Genet	www.ncbi.nlm.nih.gov/pubmed/30239722	Meta-analysis of genome-wide association studies for body fat distribution in 694,649 individuals of European ancestry.	Waist-hip ratio	697,734 European ancestry individuals	NA	14q31.1	14	79473650	NA	NRXN3			ENSG00000021645			rs17109256-A	rs17109256	0	17109256	intron_variant	0	0.2324	2e-16	15.699		0.0169	[0.013-0.021] unit increase	NR [~ 27400000] (imputed)	N	waist-hip ratio	http://www.ebi.ac.uk/efo/EFO_0004343	GCST008996	Genome-wide genotyping array
	2019-03-28	30631343	Rolfe S	2018-12-18	Front Genet	www.ncbi.nlm.nih.gov/pubmed/30631343	Associations Between Genetic Data and Quantitative Assessment of Normal Facial Asymmetry.	Normal facial asymmetry (angle of deformation score)	3,186 European ancestry individuals	NA	14q24.3	14	78345840	NRXN3	NRXN3			ENSG00000021645			rs17107396-?	rs17107396	0	17107396	intron_variant	0	NR	5e-06	5.30103				Illumina [747780]	N	facial asymmetry measurement	http://www.ebi.ac.uk/efo/EFO_0009751	GCST007449	Genome-wide genotyping array
	2018-11-16	30072576	Emilsson V	2018-08-02	Science	www.ncbi.nlm.nih.gov/pubmed/30072576	Co-regulatory networks of human serum proteins link genetics to disease.	Blood protein levels	3,200 European ancestry individuals	NA	14q31.1	14	79105688	NRXN3	NRXN3			ENSG00000021645			rs2370901-T	rs2370901	0	2370901	intron_variant	0	0.654062	6e-14	13.2218	(NRXN3, 5111_15_3)	0.189308	[0.14-0.24] unit increase	Illumina [> 1000000] (imputed)	N	blood protein measurement	http://www.ebi.ac.uk/efo/EFO_0007937	GCST006585	Targeted genotyping array
	2017-01-25	27171184	Kuo HC	2016-05-12	PLoS One	www.ncbi.nlm.nih.gov/pubmed/27171184	Genome-Wide Association Study Identifies Novel Susceptibility Genes Associated with Coronary Artery Aneurysm Formation in Kawasaki Disease.	Coronary artery aneurysm in Kawasaki disease	11 Taiwanese ancestry cases, 146 Taiwanese ancestry controls	NA	14q24.3	14	78319734	NRXN3	NRXN3			ENSG00000021645			rs11624704-?	rs11624704	0	11624704	intron_variant	0	0.0274	6e-06	5.22185		10.44	[NR]	Affymetrix [559609]	N	coronary aneurysm	http://www.ebi.ac.uk/efo/EFO_1000881	GCST003560	Genome-wide genotyping array
	2019-02-06	30595370	Kichaev G	2018-12-27	Am J Hum Genet	www.ncbi.nlm.nih.gov/pubmed/30595370	Leveraging Polygenic Functional Enrichment to Improve GWAS Power.	Body mass index	approximately 458,000 European ancestry individuals	NA	14q31.1	14	79029342		NRXN3			ENSG00000021645			rs8009329-?	rs8009329	0	8009329	intron_variant	0	NR	2e-10	9.69897				NR [~ 8900000] (imputed)	N	body mass index	http://www.ebi.ac.uk/efo/EFO_0004340	GCST007039	Genome-wide genotyping array
	2019-02-06	30595370	Kichaev G	2018-12-27	Am J Hum Genet	www.ncbi.nlm.nih.gov/pubmed/30595370	Leveraging Polygenic Functional Enrichment to Improve GWAS Power.	Body mass index	approximately 458,000 European ancestry individuals	NA	14q31.1	14	79464301		NRXN3			ENSG00000021645			rs72690737-?	rs72690737	0	72690737	intron_variant	0	NR	1e-32	32				NR [~ 8900000] (imputed)	N	body mass index	http://www.ebi.ac.uk/efo/EFO_0004340	GCST007039	Genome-wide genotyping array
	2019-02-08	29160301	Fabbri C	2017-11-21	Pharmacogenomics J	www.ncbi.nlm.nih.gov/pubmed/29160301	New insights into the pharmacogenomics of antidepressant response from the GENDEP and STAR*D studies: rare variant analysis and high-density imputation.	Response to antidepressants (symptom improvement)	2,145 European ancestry individuals	NA	14q31.1	14	79252119	NRXN3	NRXN3			ENSG00000021645			rs76191705-?	rs76191705	0	76191705	intron_variant	0	NR	2e-06	5.69897		0.1863	NR unit decrease	Affymetrix, Illumina [7062950] (imputed)	N	response to antidepressant	http://purl.obolibrary.org/obo/GO_0036276	GCST007059	Genome-wide genotyping array
	2019-12-06	31530798	Alliey-Rodriguez N	2019-09-17	Transl Psychiatry	www.ncbi.nlm.nih.gov/pubmed/31530798	NRXN1 is associated with enlargement of the temporal horns of the lateral ventricles in psychosis.	Medial orbital frontal cortex volume	87 European ancestry Schizophrenia cases, 85 African American Schizophrenia cases, 15 Schizophrenia cases, 67 European ancestry Schizoaffective disorder cases, 53 African American Schizoaffective disorder cases, 7 Schizoaffective disorder cases, 130 European ancestry Bipolar disorders cases, 33 African American Bipolar disorders cases, 6 Bipolar disorders cases, 199 European ancestry controls, 79…	NA	14q31.1	14	79319356	NRXN3	NRXN3			ENSG00000021645			rs2218786-?	rs2218786	0	2218786	intron_variant	0	NR	6e-06	5.22185				Illumina [4322238] (imputed)	N	medial orbital frontal cortex volume	http://purl.obolibrary.org/obo/OBA_2050037	GCST009190	Genome-wide genotyping array
	2019-11-05	30239722	Pulit SL	2018-09-14	Hum Mol Genet	www.ncbi.nlm.nih.gov/pubmed/30239722	Meta-analysis of genome-wide association studies for body fat distribution in 694,649 individuals of European ancestry.	Body mass index	434,794 European ancestry female individuals	NA	14q31.1	14	79433111	NA	NRXN3			ENSG00000021645			rs7141420-T	rs7141420	0	7141420	intron_variant	0	0.5463	2e-37	36.699		0.0209	[0.018-0.024] unit increase	NR [~ 27400000] (imputed)	N	body mass index	http://www.ebi.ac.uk/efo/EFO_0004340	GCST009003	Genome-wide genotyping array
	2019-11-04	30239722	Pulit SL	2018-09-14	Hum Mol Genet	www.ncbi.nlm.nih.gov/pubmed/30239722	Meta-analysis of genome-wide association studies for body fat distribution in 694,649 individuals of European ancestry.	Body mass index	374,756 European ancestry male individuals	NA	14q31.1	14	79473650	NA	NRXN3			ENSG00000021645			rs17109256-A	rs17109256	0	17109256	intron_variant	0	0.2335	1e-39	39		0.0261	[0.022-0.03] unit increase	NR [~ 27400000] (imputed)	N	body mass index	http://www.ebi.ac.uk/efo/EFO_0004340	GCST009001	Genome-wide genotyping array
	2019-11-04	30239722	Pulit SL	2018-09-14	Hum Mol Genet	www.ncbi.nlm.nih.gov/pubmed/30239722	Meta-analysis of genome-wide association studies for body fat distribution in 694,649 individuals of European ancestry.	Waist-hip ratio	316,772 European ancestry male individuals	NA	14q31.1	14	79473650	NR	NRXN3			ENSG00000021645			rs17109256-A	rs17109256	0	17109256	intron_variant	0	0.2324	2e-16	15.699		0.0169	[0.013-0.021] unit increase	NR [~ 27400000] (imputed)	N	waist-hip ratio	http://www.ebi.ac.uk/efo/EFO_0004343	GCST008998	Genome-wide genotyping array
	2019-11-05	30239722	Pulit SL	2018-09-14	Hum Mol Genet	www.ncbi.nlm.nih.gov/pubmed/30239722	Meta-analysis of genome-wide association studies for body fat distribution in 694,649 individuals of European ancestry.	Body mass index	806,834 European ancestry individuals	NA	14q31.1	14	79474040	NA	NRXN3			ENSG00000021645			rs7144011-T	rs7144011	0	7144011	intron_variant	0	0.2334	2e-40	39.699		0.0263	[0.022-0.03] unit increase	NR [~ 27400000] (imputed)	N	body mass index	http://www.ebi.ac.uk/efo/EFO_0004340	GCST009004	Genome-wide genotyping array
	2019-09-12	31409800	Pazoki R	2019-08-13	Nat Commun	www.ncbi.nlm.nih.gov/pubmed/31409800	GWAS for urinary sodium and potassium excretion highlights pathways shared with cardiovascular traits.	Urinary sodium excretion	446,237 European ancestry individuals	7,612 African ancestry individuals, 10,095 South Asian ancestry individuals	14q31.1	14	79427703	NRXN3	NRXN3			ENSG00000021645			rs10136360-G	rs10136360	0	10136360	intron_variant	0	0.779217	2e-10	9.69897	(EA)	0.00957388	[0.0066-0.0125] unit decrease	Affymetrix [~ 8800000] (imputed)	N	sodium measurement	http://www.ebi.ac.uk/efo/EFO_0009282	GCST008647	Genome-wide genotyping array
	2019-09-23	31501611	Karlsson T	2019-09-09	Nat Med	www.ncbi.nlm.nih.gov/pubmed/31501611	Contribution of genetics to visceral adiposity and its relation to cardiovascular and metabolic disease.	Predicted visceral adipose tissue	325,153 British ancestry individuals	NA	14q31.1	14	79476304	NR	NRXN3			ENSG00000021645			rs7156625-A	rs7156625	0	7156625	intron_variant	0	0.2224	2e-19	18.699		0.0268651	[0.021-0.033] unit increase	Affymetrix [10549349] (imputed)	N	visceral adipose tissue quantity	http://purl.obolibrary.org/obo/OBA_2045224	GCST008744	Genome-wide genotyping array
	2019-07-12	31043756	Stahl EA	2019-05-01	Nat Genet	www.ncbi.nlm.nih.gov/pubmed/31043756	Genome-wide association study identifies 30 loci associated with bipolar disorder.	Schizoaffective disorder-bipolar type	977 European ancestry cases, 31,358 European ancestry controls	NA	14q24.3	14	78645876	NR	NRXN3			ENSG00000021645			rs11849937-T	rs11849937	0	11849937	intron_variant	0	0.034	8e-07	6.09691		1.80273	[NR]	NR [9372253] (imputed)	N	Schizoaffective disorder-bipolar type	http://www.ebi.ac.uk/efo/EFO_0009965	GCST008117	Genome-wide genotyping array
	2020-01-08	30297969	Mahajan A	2018-10-08	Nat Genet	www.ncbi.nlm.nih.gov/pubmed/30297969	Fine-mapping type 2 diabetes loci to single-variant resolution using high-density imputation and islet-specific epigenome maps.	Type 2 diabetes	74,124 European ancestry cases, 824,006 European ancestry controls	NA	14q31.1	14	79465698	NRXN3	NRXN3			ENSG00000021645			rs17836088-C	rs17836088	0	17836088	intron_variant	0	0.2171	7e-14	13.1549		1.06	[1.04-1.08]	Affymetrix, Illumina [~ 27000000] (imputed)	N	type 2 diabetes mellitus	http://purl.obolibrary.org/obo/MONDO_0005148	GCST009379	Genome-wide genotyping array
	2019-02-08	30595370	Kichaev G	2018-12-27	Am J Hum Genet	www.ncbi.nlm.nih.gov/pubmed/30595370	Leveraging Polygenic Functional Enrichment to Improve GWAS Power.	Morning person	approximately 410,000 European ancestry individuals	NA	14q24.3	14	78289738		NRXN3			ENSG00000021645			rs112306229-?	rs112306229	0	112306229	intron_variant	0	NR	3e-08	7.52288				NR [~ 8900000] (imputed)	N	chronotype measurement	http://www.ebi.ac.uk/efo/EFO_0008328	GCST007083	Genome-wide genotyping array
	2021-05-19	33082346	Xu K	2020-10-20	Nat Commun	www.ncbi.nlm.nih.gov/pubmed/33082346	Genome-wide association study of smoking trajectory and meta-analysis of smoking status in 842,000 individuals.	Smoking initiation	842,717 European ancestry individuals	NA	14q31.1	14	79113875	NRXN3	NRXN3			ENSG00000021645			rs34121288-T	rs34121288	0	34121288	intron_variant	0	NR	5e-08	7.30103		1.02	[NR]	Affymetrix [up to 79000000] (imputed)	N	smoking initiation	http://www.ebi.ac.uk/efo/EFO_0005670	GCST011703	Genome-wide genotyping array
	2013-09-27	20197096	Stein JL	2010-03-01	Neuroimage	www.ncbi.nlm.nih.gov/pubmed/20197096	Genome-wide analysis reveals novel genes influencing temporal lobe structure with relevance to neurodegeneration in Alzheimer's disease.	Brain structure (temporal lobe volume)	173 European ancestry Alzheimer's disease cases, 361 European ancestry Mild Cognitive Impairment cases, 208 European ancestry controls	NA	14q24.3	14	78308963	KIAA0743	NRXN3			ENSG00000021645			rs7155434-A	rs7155434	0	7155434	intron_variant	0	0.27	8e-06	5.09691		3643	[NR] unit increase	Illumina [546314]	N	Alzheimer disease	http://purl.obolibrary.org/obo/MONDO_0004975	GCST000614	Genome-wide genotyping array
	2009-07-01	19557197	Heard-Costa NL	2009-06-26	PLoS Genet	www.ncbi.nlm.nih.gov/pubmed/19557197	NRXN3 is a novel locus for waist circumference: a genome-wide association study from the CHARGE Consortium.	Waist circumference	31,373 European ancestry individuals	38,641 individuals	14q31.1	14	79478819	NRXN3	NRXN3			ENSG00000021645			rs10146997-G	rs10146997	0	10146997	intron_variant	0	NR	5e-08	7.30103		0.65	[NR] cm increase	Affymetrix, Illumina [up to 512349]	N	waist circumference	http://purl.obolibrary.org/obo/OBA_1001085	GCST000427	Genome-wide genotyping array
	2012-11-20	22959728	Ahmeti KB	2012-09-05	Neurobiol Aging	www.ncbi.nlm.nih.gov/pubmed/22959728	Age of onset of amyotrophic lateral sclerosis is modulated by a locus on 1p34.1.	Amyotrophic lateral sclerosis (age of onset)	4,243 European ancestry cases	NA	14q31.1	14	79535753	NRXN3	NRXN3			ENSG00000021645			rs7147705-T	rs7147705	0	7147705	intron_variant	0	0.29	6e-06	5.22185	(Meta)			Illumina [254145]	N	amyotrophic lateral sclerosis, age at onset	http://purl.obolibrary.org/obo/MONDO_0004976, http://www.ebi.ac.uk/efo/EFO_0004847	GCST001663	Genome-wide genotyping array
	2011-05-28	21552555	Wang K	2011-04-28	PLoS One	www.ncbi.nlm.nih.gov/pubmed/21552555	A genome-wide association study on obesity and obesity-related traits.	Obesity	520 European ancestry cases, 540 European ancestry controls	1,196 European ancestry individuals	14q24.3	14	78319734	NRXN3	NRXN3			ENSG00000021645			rs11624704-?	rs11624704	0	11624704	intron_variant	0	NR	3e-09	8.52288	(WHR)			Illumina [~ 550000]	N	obesity	http://www.ebi.ac.uk/efo/EFO_0001073	GCST001057	Genome-wide genotyping array
	2013-09-12	23563607	Berndt SI	2013-04-07	Nat Genet	www.ncbi.nlm.nih.gov/pubmed/23563607	Genome-wide meta-analysis identifies 11 new loci for anthropometric traits and provides insights into genetic architecture.	Obesity	93,015 European ancestry overweight individuals, 32,858 European ancestry class I obese individuals, 9,889 European ancestry class II obese individuals, 2,896 European ancestry class III obese individuals, up to 65,840 European ancestry controls	65,332 European ancestry overweight individuals, 22,373 European ancestry class I obese individuals, 5,476 European ancestry class II obese individuals, 1,162 European ancestry class III obese individuals, up to 39,294 European ancestry controls	14q31.1	14	79433111	NRXN3	NRXN3			ENSG00000021645			rs7141420-T	rs7141420	0	7141420	intron_variant	0	0.52	1e-17	17	(Obesity class I)	1.08	[NR]	Affymetrix, Illumina [~ 2800000] (imputed)	N	obesity	http://www.ebi.ac.uk/efo/EFO_0001073	GCST001953	Genome-wide genotyping array
	2013-09-12	23563607	Berndt SI	2013-04-07	Nat Genet	www.ncbi.nlm.nih.gov/pubmed/23563607	Genome-wide meta-analysis identifies 11 new loci for anthropometric traits and provides insights into genetic architecture.	Obesity	93,015 European ancestry overweight individuals, 32,858 European ancestry class I obese individuals, 9,889 European ancestry class II obese individuals, 2,896 European ancestry class III obese individuals, up to 65,840 European ancestry controls	65,332 European ancestry overweight individuals, 22,373 European ancestry class I obese individuals, 5,476 European ancestry class II obese individuals, 1,162 European ancestry class III obese individuals, up to 39,294 European ancestry controls	14q31.1	14	79437033	NRXN3	NRXN3			ENSG00000021645			rs2370983-A	rs2370983	0	2370983	intron_variant	0	0.62	3e-09	8.52288	(Overweight)	1.04	[NR]	Affymetrix, Illumina [~ 2800000] (imputed)	N	obesity	http://www.ebi.ac.uk/efo/EFO_0001073	GCST001953	Genome-wide genotyping array
	2012-11-13	20125193	Cirulli ET	2010-02-03	Eur J Hum Genet	www.ncbi.nlm.nih.gov/pubmed/20125193	Common genetic variation and performance on standardized cognitive tests.	Cognitive performance	Up to 813 European ancestry individuals, up to 167 East Asian ancestry individuals, up to 7 Hispanic/Latin American individuals, up to 74 South Asian ancestry individuals	NA	14q24.3	14	78319816	AC007056.4-3	NRXN3			ENSG00000021645			rs6574433-?	rs6574433	0	6574433	intron_variant	0	NR	6e-06	5.22185	(Animals)			Illumina [up to 563855]	N	neuropsychological test	http://www.ebi.ac.uk/efo/EFO_0003926	GCST000579	Genome-wide genotyping array
	2017-05-23	25673412	Shungin D	2015-02-12	Nature	www.ncbi.nlm.nih.gov/pubmed/25673412	New genetic loci link adipose and insulin biology to body fat distribution.	Hip circumference	up to 56,910 European ancestry men, up to 86,570 European ancestry women	up to 36,570 European ancestry men, 30,172 European ancestry women, 915 Filipino ancestry men, 735 Filipino ancestry women, 2,351 African American/Afro-Caribbean ancestry men, 6,258 African American/Afro-Caribbean ancestry women, 2,285 South Asian ancestry men, 506 South Asian ancestry women, 195 Seychellois ancestry men, 266 Seychellois ancestry women	14q31.1	14	79474040	NRXN3	NRXN3			ENSG00000021645			rs7144011-T	rs7144011	0	7144011	intron_variant	0	0.219	9e-13	12.0458	(EA)	0.0304	[0.022-0.039] unit increase	Affymetrix, Illumina, Perlegen [up to 2542447] (imputed)	N	hip circumference	http://purl.obolibrary.org/obo/OBA_1000032	GCST004066	Genome-wide genotyping array
	2017-05-23	25673412	Shungin D	2015-02-12	Nature	www.ncbi.nlm.nih.gov/pubmed/25673412	New genetic loci link adipose and insulin biology to body fat distribution.	Hip circumference	up to 56,910 European ancestry men, up to 86,570 European ancestry women	up to 36,570 European ancestry men, 30,172 European ancestry women, 915 Filipino ancestry men, 735 Filipino ancestry women, 2,351 African American/Afro-Caribbean ancestry men, 6,258 African American/Afro-Caribbean ancestry women, 2,285 South Asian ancestry men, 506 South Asian ancestry women, 195 Seychellois ancestry men, 266 Seychellois ancestry women	14q31.1	14	79474040	NRXN3	NRXN3			ENSG00000021645			rs7144011-T	rs7144011	0	7144011	intron_variant	0	0.219	2e-11	10.699	(EA, men)	0.0395	[0.028-0.051] unit increase	Affymetrix, Illumina, Perlegen [up to 2542447] (imputed)	N	hip circumference	http://purl.obolibrary.org/obo/OBA_1000032	GCST004066	Genome-wide genotyping array
	2016-01-27	25673413	Locke AE	2015-02-12	Nature	www.ncbi.nlm.nih.gov/pubmed/25673413	Genetic studies of body mass index yield new insights for obesity biology.	Body mass index	up to 104,666 European ancestry male individuals, up to 132,115 European ancestry female individuals, 370 African American male individuals, 517 African American female individuals, 512 Hispanic male individuals, 764 Hispanic female individuals	up to 48,274 European ancestry male individuals, up to 39,864 European ancestry female individuals, 2,441 African American or Afro-Caribbean male individuals, 6,314 African American or Afro-Caribbean female individuals, 919 Filipino male individuals, 828 Filipino female individuals, 205 Seychellois male individuals, 287 Seychellois female individuals, 2,964 South Asian ancestry male individuals, …	14q31.1	14	79433111	NRXN3	NRXN3			ENSG00000021645			rs7141420-T	rs7141420	0	7141420	intron_variant	0	0.526	1e-11	11	(EA, women)	0.026	[0.019-0.034] kg/m2 increase	Affymetrix, Illumina [2550021]	N	body mass index	http://www.ebi.ac.uk/efo/EFO_0004340	GCST002783	Genome-wide genotyping array
	2016-01-27	25673413	Locke AE	2015-02-12	Nature	www.ncbi.nlm.nih.gov/pubmed/25673413	Genetic studies of body mass index yield new insights for obesity biology.	Body mass index	up to 104,666 European ancestry male individuals, up to 132,115 European ancestry female individuals, 370 African American male individuals, 517 African American female individuals, 512 Hispanic male individuals, 764 Hispanic female individuals	up to 48,274 European ancestry male individuals, up to 39,864 European ancestry female individuals, 2,441 African American or Afro-Caribbean male individuals, 6,314 African American or Afro-Caribbean female individuals, 919 Filipino male individuals, 828 Filipino female individuals, 205 Seychellois male individuals, 287 Seychellois female individuals, 2,964 South Asian ancestry male individuals, …	14q31.1	14	79433111	NRXN3	NRXN3			ENSG00000021645			rs7141420-T	rs7141420	0	7141420	intron_variant	0	0.529	9e-15	14.0458		0.023	[0.017-0.028] kg/m2 increase	Affymetrix, Illumina [2550021]	N	body mass index	http://www.ebi.ac.uk/efo/EFO_0004340	GCST002783	Genome-wide genotyping array
	2017-05-12	27958378	Floyd JS	2016-12-13	Pharmacogenomics J	www.ncbi.nlm.nih.gov/pubmed/27958378	Large-scale pharmacogenomic study of sulfonylureas and the QT, JT and QRS intervals: CHARGE Pharmacogenomics Working Group.	JT interval (sulfonylurea treatment interaction)	2,095 European ancestry exposed individuals, 42,907 European ancestry unexposed individuals, 1,167 African American exposed individuals, 10,564 African American unexposed individuals, 794 Hispanic/Latino American exposed individuals, 14,330 Hispanic/Latino American unexposed individuals	NA	14q24.3	14	78425799	NRXN3	NRXN3			ENSG00000021645			rs17107548-?	rs17107548	0	17107548	intron_variant	0	NR	1e-06	6	(Hispanic/Latino)	6.6	[4.05-9.15] ms increase	Affymetrix, Illumina [~ 2500000] (imputed)	N	JT interval, response to sulfonylurea	http://www.ebi.ac.uk/efo/EFO_0007885, http://www.ebi.ac.uk/efo/EFO_0007922	GCST004032	Genome-wide genotyping array
	2015-09-15	25387706	Vaidyanathan U	2014-12-01	Psychophysiology	www.ncbi.nlm.nih.gov/pubmed/25387706	Heritability and molecular genetic basis of electrodermal activity: a genome-wide association study.	Electrodermal activity	Up to 4,424 European ancestry twins and their parents	NA	14q24.3	14	78228725	NRXN3	NRXN3			ENSG00000021645			rs10129666-?	rs10129666	0	10129666	intron_variant	0	NR	8e-06	5.09691	(SCR Amplitude)	0.021	[0.011-0.031] unit increase	Illumina [527829]	N	skin amplitude trait	http://purl.obolibrary.org/obo/OBA_2050202	GCST002706	Genome-wide genotyping array
	2015-09-15	25387706	Vaidyanathan U	2014-12-01	Psychophysiology	www.ncbi.nlm.nih.gov/pubmed/25387706	Heritability and molecular genetic basis of electrodermal activity: a genome-wide association study.	Electrodermal activity	Up to 4,424 European ancestry twins and their parents	NA	14q24.3	14	78284644	NRXN3	NRXN3			ENSG00000021645			rs11159346-?	rs11159346	0	11159346	intron_variant	0	NR	5e-06	5.30103	(EDA Factor scores)	0.108	[0.061-0.155] unit increase	Illumina [527829]	N	skin amplitude trait	http://purl.obolibrary.org/obo/OBA_2050202	GCST002706	Genome-wide genotyping array
	2010-11-17	20935630	Speliotes EK	2010-10-10	Nat Genet	www.ncbi.nlm.nih.gov/pubmed/20935630	Association analyses of 249,796 individuals reveal 18 new loci associated with body mass index.	Body mass index	Up to 123,865 European ancestry individuals	Up to 125,931 European ancestry individuals	14q31.1	14	79470621	NRXN3	NRXN3			ENSG00000021645			rs10150332-C	rs10150332	0	10150332	intron_variant	0	0.21	3e-11	10.5229		0.13	[0.07-0.19] kg/m2 increase	Affymetrix, Illumina, Perlegen [~ 2800000] (imputed)	N	body mass index	http://www.ebi.ac.uk/efo/EFO_0004340	GCST000830	Genome-wide genotyping array
	2015-04-23	25133637	Scannell Bryan M	2014-08-18	PLoS One	www.ncbi.nlm.nih.gov/pubmed/25133637	Genome-wide association studies and heritability estimates of body mass index related phenotypes in Bangladeshi adults.	Underweight status	953 Bangladeshi ancestry underweight females, 1,269 Bangladeshi ancestry normal weight females, 1,146 Bangladeshi ancestry underweight males, 1,106 normal weight males	NA	14q31.1	14	79380895	NRXN3	NRXN3			ENSG00000021645			rs12882679-G	rs12882679	0	12882679	intron_variant	0	0.687	1e-06	6		0.057	[0.033-0.081] unit increase	Illumina [1208102] (imputed)	N	underweight body mass index status	http://www.ebi.ac.uk/efo/EFO_0005936	GCST002569	Genome-wide genotyping array
	2020-01-09	23823483	Rhee EP	2013-07-02	Cell Metab	www.ncbi.nlm.nih.gov/pubmed/23823483	A genome-wide association study of the human metabolome in a community-based cohort.	Metabolite levels	2,076 European ancestry individuals	NA	14q31.1	14	79104267	DIO2	NRXN3			ENSG00000021645			rs11623049-?	rs11623049	0	11623049	intron_variant	0	NR	8e-06	5.09691	(TAG 58:12)	0.272044	[0.15-0.39] unit decrease	Affymetrix [at least 2500000] (imputed)	N	triacylglycerol 58:12 measurement	http://www.ebi.ac.uk/efo/EFO_0010439	GCST009391	Genome-wide genotyping array
	2017-08-04	27989323	Ahola-Olli AV	2016-12-13	Am J Hum Genet	www.ncbi.nlm.nih.gov/pubmed/27989323	Genome-wide Association Study Identifies 27 Loci Influencing Concentrations of Circulating Cytokines and Growth Factors.	Fibroblast growth factor basic levels	7,565 Finnish ancestry individuals	NA	14q24.3	14	78224988	NR	NRXN3			ENSG00000021645			rs36182263-G	rs36182263	0	36182263	intron_variant	0	NR	8e-06	5.09691		0.1273	[0.071-0.183] SD units decrease	NR [10700000] (imputed)	N	fibroblast growth factor 2 amount	http://purl.obolibrary.org/obo/OBA_2050154	GCST004459	Genome-wide genotyping array
Yes	2017-08-04	27989323	Ahola-Olli AV	2016-12-13	Am J Hum Genet	www.ncbi.nlm.nih.gov/pubmed/27989323	Genome-wide Association Study Identifies 27 Loci Influencing Concentrations of Circulating Cytokines and Growth Factors.	Interleukin-5 levels	3,364 Finnish ancestry individuals	NA	14q31.1	14	79363724	NR	NRXN3			ENSG00000021645			rs74811276-G	rs74811276	0	74811276	intron_variant	0	NR	6e-06	5.22185		0.2152	[0.12-0.31] SD units decrease	NR [10700000] (imputed)	N	interleukin 5 measurement	http://www.ebi.ac.uk/efo/EFO_0008185	GCST004452	Genome-wide genotyping array
	2019-05-21	30595370	Kichaev G	2018-12-27	Am J Hum Genet	www.ncbi.nlm.nih.gov/pubmed/30595370	Leveraging Polygenic Functional Enrichment to Improve GWAS Power.	Height	approximately 458,000 European ancestry individuals	NA	14q31.1	14	79433111		NRXN3			ENSG00000021645			rs7141420-?	rs7141420	0	7141420	intron_variant	0	NR	5e-09	8.30103				NR [~ 8900000] (imputed)	N	body height	http://purl.obolibrary.org/obo/OBA_VT0001253	GCST007841	Genome-wide genotyping array
	2024-10-18	39349817	Park S	2024-09-30	Nat Genet	www.ncbi.nlm.nih.gov/pubmed/39349817	Multivariate genomic analysis of 5‚Äâmillion people elucidates the genetic architecture of shared components of the metabolic syndrome.	Metabolic syndrome	1,384,348 European ancestry individuals	NA	14q31.1	14	79704791		NRXN3			ENSG00000021645			rs4486812-?	rs4486812	0	4486812	intron_variant	0	NR	4e-10	9.39794				NR [2265555] (imputed)	N	metabolic syndrome	http://www.ebi.ac.uk/efo/EFO_0000195	GCST90444487	Genome-wide genotyping array
	2024-10-18	39349817	Park S	2024-09-30	Nat Genet	www.ncbi.nlm.nih.gov/pubmed/39349817	Multivariate genomic analysis of 5‚Äâmillion people elucidates the genetic architecture of shared components of the metabolic syndrome.	Metabolic syndrome	1,384,348 European ancestry individuals	NA	14q31.1	14	79033507		NRXN3			ENSG00000021645			rs10146527-?	rs10146527	0	10146527	intron_variant	0	NR	8e-12	11.0969		0.00900092	[0.0065-0.0115] unit increase	NR [2265555] (imputed)	N	metabolic syndrome	http://www.ebi.ac.uk/efo/EFO_0000195	GCST90444487	Genome-wide genotyping array
	2024-10-18	39349817	Park S	2024-09-30	Nat Genet	www.ncbi.nlm.nih.gov/pubmed/39349817	Multivariate genomic analysis of 5‚Äâmillion people elucidates the genetic architecture of shared components of the metabolic syndrome.	Metabolic syndrome	1,384,348 European ancestry individuals	NA	14q31.1	14	79412984		NRXN3			ENSG00000021645			rs2574750-?	rs2574750	0	2574750	intron_variant	0	NR	5e-18	17.301				NR [2265555] (imputed)	N	metabolic syndrome	http://www.ebi.ac.uk/efo/EFO_0000195	GCST90444487	Genome-wide genotyping array
	2024-10-18	39349817	Park S	2024-09-30	Nat Genet	www.ncbi.nlm.nih.gov/pubmed/39349817	Multivariate genomic analysis of 5‚Äâmillion people elucidates the genetic architecture of shared components of the metabolic syndrome.	Metabolic syndrome	1,384,348 European ancestry individuals	NA	14q31.1	14	79474040		NRXN3			ENSG00000021645			rs7144011-?	rs7144011	0	7144011	intron_variant	0	NR	3e-46	45.5229		0.0225312	[0.019-0.026] unit decrease	NR [2265555] (imputed)	N	metabolic syndrome	http://www.ebi.ac.uk/efo/EFO_0000195	GCST90444487	Genome-wide genotyping array
[truncated: 271 more rows]
